# Supplementary material for: Discretization of Gene Expression Data Unmasks Molecular Subgroups Recurring in Different Human Cancer Types
Source: PLoS One. 2016 Aug 18;11(8):e0161514. doi: 10.1371/journal.pone.0161514 (PMC4990327; doi:10.1371/journal.pone.0161514)
Supplement: S1 Table — (XLSX) [file pone.0161514.s001.xlsx]

## Sheet: Studies overview
Beleut et al. S1 Table
Gene expression DataSets from Gene Expression Omnibus (GEO) repository used for calculations.
Tumor Type	GSE	Total number of arrays	hgu133a	hgu133b	hgu133plus2
Bladder	GSE5287	30	30	0	0
Brain Tumor	GSE28026, GSE33331, GSE4412	188	85	85	18
Breast Cancer	GSE11121, GSE12093, GSE1456, GSE17705, GSE2034, GSE2034, GSE25065, GSE25066, GSE2603, GSE26971, GSE42568, GSE45255, GSE4922, GSE5327, GSE6532, GSE7390	4177	3194	775	208
Colon Cancer	GSE17536, GSE33113, GSE52513, GSE52847	347	0	0	347
Gastric Cancer	GSE38749	15	0	0	15
Laryngeal Cancer	GSE27020	109	109	0	0
Leukemia	GSE12417, GSE22762, GSE28462, GSE37168, GSE8970	777	246	207	324
Lung Cancer	GSE14814, GSE29013, GSE30219	495	133	0	362
Lymphoma	GSE16131, GSE34771, GSE4475, GSE53786	742	405	184	153
Normal	GSE1133, GSE 2361, GSE 53757	266	194	0	72
Ovarian Cancer	GSE14764, GSE26712, GSE44104, GSE18520	388	275	0	113
Pancreatic Cancer	GSE16515	36	0	0	36
Renal Cancer	GSE11151, GSE14994, GSE22541, GSE53757, GSE781; GSE31403	513	306	0	207
Sarcoma	GSE17674, GSE17679, GSE30929	314	135	0	179
all	55 DataSets	8397	5112	1251	2034
