# Supplementary material for: Discretization of Gene Expression Data Unmasks Molecular Subgroups Recurring in Different Human Cancer Types
Source: PLoS One. 2016 Aug 18;11(8):e0161514. doi: 10.1371/journal.pone.0161514 (PMC4990327; doi:10.1371/journal.pone.0161514)
Supplement: S3 Table — (XLSX) [file pone.0161514.s003.xlsx]

## Sheet: CTP calculation with subsets
Beleut et al. S3 Table
CTP affiliation with distinct subsets of genes. CTPs were calculated on GSE19949 and transduced to other cancer types. Results are presented in percent similarity, relative to the situation in which all probesets on the array were used for CTP calculation. Shown are results for individual studies and the summary (please scroll down).
Individual Studies
GSE Entry Number	Tumor Type	Number of datasets used	Tumor Suppressor Genes - 716 probesets	OncoGenes - 690 probesets	Random Genes - 700 probesets
GSE5287	Bladder Cancer	30	73.3333	86.6667	86.6667
GSE33331	Brain Tumor	4	75	75	75
GSE4412	Brain Tumor	170	72.9412	75.2941	77.6471
GSE28026	Brain Tumor	14	71.4286	78.5714	100
GSE42568	Breast Cancer	121	82.6446	82.6446	87.6033
GSE25066	Breast Cancer	508	79.9213	83.8583	85.0394
GSE25065	Breast Cancer	198	80.8081	80.303	87.8788
GSE5327	Breast Cancer	58	67.2414	75.8621	75.8621
GSE7390	Breast Cancer	198	74.7475	70.202	78.7879
GSE6532	Breast Cancer	741	81.6514	81.0398	87.4618
GSE2603	Breast Cancer	121	79.3388	85.9504	90.0826
GSE26971	Breast Cancer	277	83.7545	81.2274	87.0036
GSE12093	Breast Cancer	136	83.8235	88.2353	88.2353
GSE4922	Breast Cancer	578	84.4291	81.3149	86.5052
GSE17705	Breast Cancer	298	86.5772	82.5503	86.5772
GSE45255	Breast Cancer	139	80.5755	76.259	89.2086
GSE1456	Breast Cancer	318	70.4403	77.3585	84.2767
GSE2034	Breast Cancer	286	82.8671	81.1189	87.4126
GSE11121	Breast Cancer	200	79	78	78.5
GSE52513	Colon Cancer	37	81.0811	91.8919	91.8919
GSE33113	Colon Cancer	96	75	66.6667	80.2083
GSE52847	Colon Cancer	37	81.0811	91.8919	91.8919
GSE17536	Colon Cancer	177	80.226	76.8362	78.5311
GSE38749	Gastric Cancer	15	80	93.3333	73.3333
GSE27020	Laryngeal Cancer	109	75.2294	80.7339	88.9908
GSE12417	Leukemia	405	68.7117	77.9141	80.9816
GSE37168	Leukemia	40	77.5	80	92.5
GSE8970	Leukemia	39	87.1795	66.6667	92.3077
GSE22762	Leukemia	195	52.2727	70.4545	70.4545
GSE28462	Leukemia	98	70.4082	75.5102	78.5714
GSE30219	Lung Cancer	307	70.684	71.3355	82.7362
GSE29013	Lung Cancer	55	69.0909	70.9091	72.7273
GSE14814	Lung Cancer	133	85.7143	78.1955	78.9474
GSE34771	Lymphoma	34	91.1765	73.5294	82.3529
GSE53786	Lymphoma	119	77.3109	63.8655	84.8739
GSE16131	Lymphoma	368	75	76.6304	87.5
GSE4475	Lymphoma	221	70.5882	71.4932	77.3756
GSE44104	Ovarian Cancer	60	85	80	81.6667
GSE14764	Ovarian Cancer	80	72.5	83.75	75
GSE26712	Ovarian Cancer	195	88.2051	87.6923	89.2308
GSE18520	Ovarian Cancer	53	90.566	84.9057	84.9057
GSE16515	Pancreatic Cancer	36	86.1111	75	91.6667
GSE11151	Renal Cell Carcinoma	67	89.5522	88.0597	94.0299
GSE14994	Renal Cell Carcinoma	70	88.5714	92.8571	98.5714
GSE22541	Renal Cell Carcinoma	68	91.1765	91.1765	91.1765
GSE53757	Renal Cell Carcinoma	72	90.2778	90.2778	93.0556
GSE781	Renal Cell Carcinoma	12	91.6667	91.6667	100
GSE31403	Renal Cell Carcinoma Wilms tumor	224	76.7857	81.6964	83.9286
GSE30929	Sarcoma	135	74.8148	85.1852	88.8889
GSE17674	Sarcoma	62	69.3548	82.2581	90.3226
GSE17679	Sarcoma	117	80.3419	82.0513	91.453
			74.8372	83.1649	90.2215
Overall Summary - mean values
	Cancer Type		Tumor Suppressor Genes - 716 probesets	OncoGenes - 690 probesets	Random Genes - 700 probesets
	RCC - GSE19949		100	100	100
	Bladder Cancer		73.3333	86.6667	86.6667
	Brain Tumor		73.1758	76.2885	84.2157
	Breast Cancer		79.8547	80.395	85.3623
	Colon Cancer		79.347	81.8217	85.6308
	Gastric Cancer		80	93.3333	73.3333
	Laryngeal Cancer		75.2294	80.7339	88.9908
	Leukemia		71.2144	74.1091	82.963
	Lung Cancer		75.1631	73.48	78.137
	Lymphoma		78.5189	71.3796	83.0256
	Ovarian Cancer		84.0678	84.087	82.7008
	Pancreatic Cancer		86.1111	75	91.6667
	Renal Cell Carcinoma		88.005	89.289	93.4603
	Sarcoma		74.8372	83.1649	90.2215
	mean		79.9184	80.7499	86.1696
	standard deviation		7.65372	8.16336	6.59563
