# Supplementary material for: Discretization of Gene Expression Data Unmasks Molecular Subgroups Recurring in Different Human Cancer Types
Source: PLoS One. 2016 Aug 18;11(8):e0161514. doi: 10.1371/journal.pone.0161514 (PMC4990327; doi:10.1371/journal.pone.0161514)
Supplement: S5 Table — (XLSX) [file pone.0161514.s005.xlsx]

## Sheet: Oncogenes exp. dev. per CTP
ProbesetID	Symbol	Value - RCC CTP-A	Value - RCC CTP-B	Value - RCC CTP-C	Profile - RCC CTP-A	Profile - RCC CTP-B	Profile - RCC CTP-C	Bladder Cancer A	Bladder Cancer B	Bladder Cancer C	Brain Tumor A	Brain Tumor B	Brain Tumor C	Breast Cancer A	Breast Cancer B	Breast Cancer C	Colon Cancer A	Colon Cancer B	Colon Cancer C	Gastric Cancer A	Gastric Cancer B	Gastric Cancer C	Laryngeal Cancer A	Laryngeal Cancer B	Laryngeal Cancer C	Leukaemia A	Leukaemia B	Leukaemia C	Lung Cancer A	Lung Cancer B	Lung Cancer C	Lymphoma A	Lymphoma B	Lymphoma C	Ovarian Cancer A	Ovarian Cancer B	Ovarian Cancer C	Renal Cell Carcinoma A	Renal Cell Carcinoma B	Renal Cell Carcinoma C	Renal Cancer A - (Wilms tumor)	Renal Cancer B - (Wilms tumor)	Renal Cancer C - (Wilms tumor)	Sarcoma A	Sarcoma B	Sarcoma C
202643_s_at	TNFAIP3	0.238095	-0.111111	-0.357143	0.238095	-0.111111	-0.357143	0.314779	0.136675	-0.451454	1.44993	-0.419468	-1.03046	0.269809	0.049616	-0.319424	0.382692	0.089837	-0.47253	NA	NA	NA	0.433449	-0.165728	-0.267721	0.169867	0.101887	-0.271754	0.600956	-0.261179	-0.339777	0.519876	0.124765	-0.644641	0.691055	-0.145132	-0.545923	0.739563	0.326886	-1.06645	0.139644	0.055748	-0.195392	0.267249	0.059923	-0.327172
206363_at	MAF	0.333333	0	-0.357143	0.333333	0	-0.357143	0.508422	0.04399	-0.552412	0.581648	-0.21172	-0.369929	0.482711	-0.107687	-0.375024	0.444595	0.163995	-0.608591	1.02769	0.023251	-1.05094	0.369682	-0.077012	-0.29267	0.541166	-0.089939	-0.451227	0.3128	-0.127855	-0.184944	0.735331	-0.273994	-0.461337	0.708771	-0.177704	-0.531067	NA	NA	NA	0.052024	0.046187	-0.098211	0.712974	0.457406	-1.17038
202246_s_at	CDK4	0.214286	-0.888889	0.5	0.214286	-0.888889	0.5	-0.162393	-0.263931	0.426324	0.048672	-0.315529	0.266857	0.116245	-0.409383	0.293138	-0.031622	-0.29986	0.331482	NA	NA	NA	-0.142131	-0.21352	0.355651	-0.110932	-0.79091	0.901842	-0.113815	-0.672522	0.786336	NA	NA	NA	-0.02052	-0.602732	0.623252	0.064004	-0.250311	0.186308	-0.00212	-0.260881	0.263001	-0.092531	-0.223568	0.316099
209348_s_at	MAF	0.404762	0	-0.571429	0.404762	0	-0.571429	0.778147	-0.090043	-0.688103	0.509918	-0.244863	-0.265054	0.748622	-0.176126	-0.572495	0.622024	0.089539	-0.711563	0.69258	-0.129679	-0.562901	0.291563	-0.110704	-0.180859	NA	NA	NA	NA	NA	NA	0.678738	-0.266295	-0.412443	1.11043	-0.368556	-0.741876	0.400515	-0.192855	-0.20766	0.165321	0.149219	-0.31454	0.784816	0.462066	-1.24688
210538_s_at	BIRC3	0.119048	-0.111111	-0.142857	0.119048	-0.111111	-0.142857	0.452042	0.061173	-0.513215	0.461973	-0.122818	-0.339155	0.198478	0.008803	-0.207281	0.449304	-0.078693	-0.370611	NA	NA	NA	0.482476	-0.048491	-0.433986	0.224432	-0.053564	-0.170867	0.421673	-0.172883	-0.24879	NA	NA	NA	0.280761	-0.11188	-0.168881	1.06691	0.272512	-1.33942	0.006062	-0.002683	-0.00338	0.23418	-0.07638	-0.157799
212436_at	TRIM33	0.047619	-0.777778	0.0714286	0.047619	-0.777778	0.0714286	NA	NA	NA	-0.009262	-0.116485	0.125747	0.065351	-0.213575	0.148224	-0.076678	-0.277562	0.35424	0.026135	-0.391225	0.365089	-0.058842	-0.064812	0.123654	0.043852	-0.18068	0.136828	-0.184467	-0.391973	0.576439	NA	NA	NA	-0.136852	-0.356642	0.493493	0.083128	-0.230435	0.147307	0.007447	-0.156017	0.14857	-0.200967	-0.398941	0.599908
200605_s_at	PRKAR1A	0.452381	-1	0.357143	0.452381	-1	0.357143	0.236074	-0.342434	0.10636	0.184375	-0.131838	-0.052536	0.349656	-0.557929	0.208274	0.21898	-0.172252	-0.046728	NA	NA	NA	0.278169	-0.306302	0.028133	NA	NA	NA	NA	NA	NA	0.240192	-0.316208	0.076016	0.769253	-1.15444	0.385183	0.289871	-0.465875	0.176005	0.167992	-0.294231	0.126239	0.489709	-0.271429	-0.21828
202520_s_at	MLH1	0.190476	-0.888889	0.428571	0.190476	-0.888889	0.428571	0.020878	-0.24705	0.226172	NA	NA	NA	0.162354	-0.342828	0.180473	0.027028	-0.096068	0.069041	NA	NA	NA	NA	NA	NA	0.03454	-0.45178	0.41724	0.095013	-0.495048	0.400035	-0.067414	-0.169022	0.236436	0.066807	-0.528474	0.461667	-0.002699	-0.187945	0.190643	0.000284	-0.146903	0.14662	0.009854	-0.081316	0.071463
203358_s_at	EZH2	-0.190476	0.111111	0.285714	-0.190476	0.111111	0.285714	NA	NA	NA	-0.415437	-0.096149	0.511586	-0.410098	-0.186491	0.596589	-0.387392	-0.147335	0.534727	-0.515514	0.059075	0.456438	-0.241342	-0.077189	0.318531	NA	NA	NA	-0.718112	-0.40256	1.12067	-0.280219	-0.181606	0.461825	-0.473524	-0.199104	0.672628	NA	NA	NA	-0.257849	-0.048423	0.306272	-1.09699	-0.629454	1.72645
203934_at	KDR	0.595238	-0.222222	-0.857143	0.595238	-0.222222	-0.857143	0.322994	-0.088685	-0.234309	0.613882	-0.151485	-0.462397	0.404294	-0.115821	-0.288473	0.342111	0.080857	-0.422969	0.703385	-0.056503	-0.646882	0.123511	-0.024689	-0.098822	NA	NA	NA	0.226296	-0.04549	-0.180806	0.273145	-0.12275	-0.150394	NA	NA	NA	1.34473	0.209963	-1.55469	0.210117	-0.016929	-0.193188	NA	NA	NA
208758_at	ATIC	0.166667	-0.777778	0.5	0.166667	-0.777778	0.5	0.119159	-0.321817	0.202658	0.016289	-0.255104	0.238815	0.075638	-0.310881	0.235243	-0.14336	-0.18189	0.32525	NA	NA	NA	-0.009458	-0.164182	0.17364	-0.075314	-0.71612	0.791435	-0.044962	-0.602929	0.647891	NA	NA	NA	-0.040809	-0.3695	0.410308	-0.025702	-0.21657	0.242272	-0.033666	-0.196657	0.230323	NA	NA	NA
209959_at	NR4A3	0.119048	-0.555556	-0.642857	0.119048	-0.555556	-0.642857	0.323392	0.059211	-0.382603	0.137812	0.133896	-0.271709	NA	NA	NA	0.310829	0.117553	-0.428382	NA	NA	NA	0.167268	0.031312	-0.19858	0.495546	0.0673	-0.562846	0.415175	0.056571	-0.471746	0.08076	0.058263	-0.139022	0.741349	0.096429	-0.837778	0.309742	0.116754	-0.426496	NA	NA	NA	0.341939	0.210223	-0.552162
210044_s_at	LYL1	-0.166667	0.888889	-0.5	-0.166667	0.888889	-0.5	0.027089	0.135396	-0.162485	NA	NA	NA	0.082374	0.15305	-0.235424	NA	NA	NA	0.168688	0.173111	-0.341798	0.015485	0.0793	-0.094785	NA	NA	NA	0.011453	0.112462	-0.123915	0.040186	0.100317	-0.140503	0.017637	0.082059	-0.099696	0.117234	0.232201	-0.349434	-0.027484	0.058454	-0.03097	0.085759	0.205359	-0.291119
210131_x_at	SDHC	0.261905	-1	0.571429	0.261905	-1	0.571429	-0.005594	-0.224369	0.229962	NA	NA	NA	0.113927	-0.429085	0.315159	0.091913	-0.271889	0.179976	NA	NA	NA	0.150843	-0.36368	0.212837	-0.029419	-0.504699	0.534118	0.025704	-0.52484	0.499136	-0.017555	-0.186988	0.204543	0.052609	-0.690246	0.637637	0.123873	-0.563828	0.439955	0.046177	-0.326805	0.280628	NA	NA	NA
210541_s_at	TRIM27	-0.0952381	-0.666667	0.285714	-0.0952381	-0.666667	0.285714	0.125928	-0.842755	0.716826	0.203423	-0.434105	0.230682	0.165315	-0.38044	0.215126	0.05908	-0.322221	0.263141	NA	NA	NA	-0.011011	-0.286425	0.297435	-0.122501	-0.509331	0.631833	0.062232	-0.519726	0.457494	NA	NA	NA	-0.093834	-0.492608	0.586442	NA	NA	NA	0.164723	-0.506667	0.341945	-0.203393	-0.437103	0.640495
211339_s_at	ITK	-0.214286	-0.222222	-0.642857	-0.214286	-0.222222	-0.642857	0.311578	0.063004	-0.374582	NA	NA	NA	0.175981	0.00193	-0.177911	0.404701	0.001572	-0.406272	0.606808	0.002888	-0.609695	0.218708	-0.076386	-0.142322	0.413302	0.07833	-0.491632	0.460545	-0.038651	-0.421893	0.922125	-0.145687	-0.776438	NA	NA	NA	0.700371	0.372184	-1.07255	NA	NA	NA	0.242039	-0.016437	-0.225603
213541_s_at	ERG	0.47619	-0.777778	-0.785714	0.47619	-0.777778	-0.785714	0.179299	-0.007634	-0.171665	NA	NA	NA	0.296458	-0.002991	-0.293468	0.35046	0.007755	-0.358215	0.832911	-0.138641	-0.69427	0.031406	0.005022	-0.036428	NA	NA	NA	0.321413	-0.071531	-0.249882	0.167006	-0.049306	-0.1177	NA	NA	NA	0.979463	0.120247	-1.09971	0.050435	0.012035	-0.06247	0.482897	0.205435	-0.688332
215404_x_at	FGFR1	-0.404762	1	0	-0.404762	1	0	-0.274909	0.309678	-0.034769	-0.206736	0.241176	-0.034441	-0.207113	0.393075	-0.185961	-0.209723	0.332191	-0.122469	-0.137088	0.077722	0.059365	-0.303352	0.547803	-0.244451	NA	NA	NA	NA	NA	NA	NA	NA	NA	-0.646198	0.83005	-0.183852	-0.21998	0.304057	-0.084077	-0.314877	0.538088	-0.22321	-0.170947	0.262611	-0.091665
218656_s_at	LHFP	0.619048	-0.666667	-0.714286	0.619048	-0.666667	-0.714286	0.518365	-0.073446	-0.444919	0.498867	-0.026815	-0.472052	1.01118	-0.166182	-0.844997	0.626139	0.0508	-0.676939	1.03936	-0.278028	-0.761332	0.802638	-0.394177	-0.408461	0.13369	-0.053176	-0.080515	NA	NA	NA	NA	NA	NA	1.07257	-0.30341	-0.769163	0.816175	0.199395	-1.01557	0.444256	0.388071	-0.832326	NA	NA	NA
200600_at	MSN	0.261905	-0.111111	-0.142857	0.261905	-0.111111	-0.142857	0.560242	-0.007602	-0.55264	0.883267	-0.368115	-0.515153	0.365534	-0.082149	-0.283385	0.520034	0.05265	-0.572684	NA	NA	NA	0.246072	-0.05498	-0.191092	NA	NA	NA	0.464763	-0.212948	-0.251815	NA	NA	NA	0.220251	-0.064468	-0.155783	0.263308	-0.041375	-0.221933	0.316558	-0.045685	-0.270874	NA	NA	NA
200631_s_at	SET	0.452381	-1	0.5	0.452381	-1	0.5	-0.012281	-0.139048	0.15133	NA	NA	NA	NA	NA	NA	-0.083524	-0.126354	0.209879	NA	NA	NA	-0.099329	-0.198565	0.297894	-0.032877	-0.268955	0.301832	-0.053333	-0.540162	0.593496	-0.070235	-0.112388	0.182623	0.190388	-0.486119	0.295731	NA	NA	NA	-0.023139	-0.203689	0.226828	-0.203297	-0.247016	0.450313
201464_x_at	JUN	0.190476	0.111111	-0.714286	0.190476	0.111111	-0.714286	NA	NA	NA	0.36895	-0.176729	-0.192221	0.230793	0.075284	-0.306076	NA	NA	NA	0.240139	-0.097168	-0.142971	0.292735	-0.114726	-0.178009	NA	NA	NA	0.100587	-0.035875	-0.064712	0.357985	0.215961	-0.573947	0.049553	0.027016	-0.076569	0.271546	0.039854	-0.3114	0.157431	0.110009	-0.26744	NA	NA	NA
201586_s_at	SFPQ	0.119048	-0.777778	0.642857	0.119048	-0.777778	0.642857	0.011531	-0.206053	0.194522	NA	NA	NA	0.11765	-0.303075	0.185426	-0.052584	-0.10699	0.159575	NA	NA	NA	-0.053267	-0.1139	0.167167	0.006738	-0.248424	0.241686	-0.10359	-0.384544	0.488134	NA	NA	NA	0.102326	-0.54973	0.447404	NA	NA	NA	-0.068558	-0.081289	0.149846	-0.26752	-0.361232	0.628752
201754_at	COX6C	0.119048	-0.555556	0.428571	0.119048	-0.555556	0.428571	0.098929	-0.302734	0.203805	NA	NA	NA	-0.105871	-0.210047	0.315918	0.012473	-0.125477	0.113004	NA	NA	NA	NA	NA	NA	-0.117485	-0.342737	0.460222	-0.124043	-0.521534	0.645577	NA	NA	NA	-0.054273	-0.235815	0.290088	0.003016	-0.17655	0.173533	0.009685	-0.16638	0.156695	0.028818	-0.102945	0.074127
202004_x_at	SDHC	0.238095	-0.888889	0.5	0.238095	-0.888889	0.5	NA	NA	NA	NA	NA	NA	0.085001	-0.347035	0.262034	0.06747	-0.198578	0.131108	NA	NA	NA	0.08382	-0.210875	0.127055	-0.117415	-0.371161	0.488576	0.060339	-0.631061	0.570722	-0.022758	-0.130767	0.153525	0.080976	-0.572812	0.491836	0.069174	-0.434822	0.365648	0.032353	-0.253011	0.220658	NA	NA	NA
202273_at	PDGFRB	0.357143	0.333333	-0.714286	0.357143	0.333333	-0.714286	0.497294	0.236184	-0.733478	0.342872	-0.042781	-0.300091	0.54877	0.1435	-0.69227	0.409829	0.149252	-0.55908	NA	NA	NA	0.321053	0.019097	-0.34015	NA	NA	NA	0.367742	0.014613	-0.382356	0.280419	0.111287	-0.391706	0.323826	0.07147	-0.395297	0.817531	0.524012	-1.34154	NA	NA	NA	NA	NA	NA
202644_s_at	TNFAIP3	0.190476	0.111111	-0.428571	0.190476	0.111111	-0.428571	0.37116	0.185509	-0.556669	1.42758	-0.351097	-1.07649	0.355135	0.098443	-0.453579	NA	NA	NA	NA	NA	NA	0.286641	-0.01521	-0.271431	0.160864	0.108469	-0.269333	0.477037	0.005559	-0.482596	0.410667	0.16032	-0.570987	0.755698	-0.041502	-0.714197	0.596481	0.327398	-0.923879	NA	NA	NA	NA	NA	NA
203033_x_at	FH	0.0714286	-0.777778	0.571429	0.0714286	-0.777778	0.571429	0.09786	-0.248383	0.150523	NA	NA	NA	0.014624	-0.203956	0.189332	-0.074733	-0.122758	0.197491	NA	NA	NA	NA	NA	NA	0.003104	-0.466538	0.463434	-0.058942	-0.591167	0.65011	NA	NA	NA	0.034235	-0.368777	0.334542	-0.112988	-0.278841	0.391829	-0.010135	-0.120437	0.130572	-0.050029	-0.294685	0.344714
203795_s_at	BCL7A	-0.285714	-0.222222	0.357143	-0.285714	-0.222222	0.357143	NA	NA	NA	-0.871126	0.418537	0.452589	NA	NA	NA	NA	NA	NA	-0.367771	0.059736	0.308035	-0.086882	0.038416	0.048466	NA	NA	NA	-0.329762	-0.217654	0.547416	-0.3726	0.10602	0.26658	-0.17048	-0.040621	0.211101	-0.266028	-0.094624	0.360652	-0.179405	-0.163275	0.34268	-0.359115	-0.205242	0.564357
203805_s_at	FANCA	0.0714286	0.111111	0.214286	0.0714286	0.111111	0.214286	-0.140733	0.061108	0.079626	NA	NA	NA	-0.093927	-0.027636	0.121564	-0.162372	-0.021565	0.183937	-0.895049	0.405693	0.489356	NA	NA	NA	NA	NA	NA	-0.295022	-0.206419	0.501441	-0.409057	0.043589	0.365468	-0.075359	-0.063744	0.139103	NA	NA	NA	-0.18684	0.088764	0.098075	-0.315158	-0.167628	0.482786
204977_at	DDX10	0.047619	-0.666667	0.0714286	0.047619	-0.666667	0.0714286	-0.192105	-0.42325	0.615355	NA	NA	NA	0.176295	-0.355575	0.17928	NA	NA	NA	0.053332	-0.401087	0.347755	-0.027526	-0.239382	0.266908	0.002529	-0.688653	0.686124	-0.205969	-0.537004	0.742974	NA	NA	NA	0.031979	-0.515579	0.4836	0.052094	-0.456691	0.404598	0.019607	-0.213916	0.194309	NA	NA	NA
205292_s_at	HNRNPA2B1	0.047619	-0.777778	0.642857	0.047619	-0.777778	0.642857	-0.025303	-0.069311	0.094614	-0.045503	-0.078915	0.124418	0.035454	-0.204097	0.168643	NA	NA	NA	-0.002642	-0.169639	0.172281	NA	NA	NA	-0.039297	-0.360126	0.399424	-0.095238	-0.449634	0.544872	-0.090079	-0.121246	0.211326	-0.020398	-0.279067	0.299465	NA	NA	NA	NA	NA	NA	-0.176019	-0.182519	0.358538
205908_s_at	OMD	0.0238095	0	0	0.0238095	0	0	NA	NA	NA	0.175224	-0.046622	-0.128602	0.793498	-0.218001	-0.575497	0.38917	-0.045854	-0.343317	0.461281	0.078539	-0.53982	0.550562	-0.2563	-0.294262	NA	NA	NA	0.484673	-0.238182	-0.246492	0.083457	-0.021574	-0.061883	0.269899	-0.088521	-0.181378	NA	NA	NA	NA	NA	NA	0.541297	0.128065	-0.669362
206074_s_at	HMGA1	-0.547619	0.222222	0.642857	-0.547619	0.222222	0.642857	NA	NA	NA	NA	NA	NA	-0.31447	-0.122077	0.436547	-0.230934	-0.088643	0.319576	-0.883732	0.262773	0.620959	-0.504877	-0.069694	0.574571	-0.229021	-0.167633	0.396655	NA	NA	NA	-0.444957	0.171707	0.273249	-0.500287	-0.233211	0.733498	-0.575171	-0.065861	0.641032	NA	NA	NA	-0.569294	-0.28759	0.856884
207004_at	BCL2	-0.571429	0.555556	-0.357143	-0.571429	0.555556	-0.357143	-0.03993	0.069036	-0.029106	-0.036624	0.034276	0.002348	-0.199284	0.214416	-0.015133	-0.008984	0.014928	-0.005944	-0.15876	0.162112	-0.003352	-0.025865	0.039394	-0.013529	NA	NA	NA	NA	NA	NA	-0.154613	0.154396	0.000217	-0.077215	0.140258	-0.063044	NA	NA	NA	-0.087643	0.159858	-0.072215	NA	NA	NA
207493_x_at	SSX2	0.0238095	0.111111	0.0714286	0.0238095	0.111111	0.0714286	-0.104074	0.145518	-0.041444	-0.068708	0.104179	-0.035471	-0.04821	0.036744	0.011467	-0.017061	0.021254	-0.004193	-0.520478	0.914633	-0.394155	-0.047284	0.068695	-0.021412	NA	NA	NA	-0.069037	0.058157	0.01088	NA	NA	NA	NA	NA	NA	-0.098849	0.073298	0.025551	-0.018922	0.027713	-0.008791	NA	NA	NA
207961_x_at	MYH11	0.166667	0.111111	-0.714286	0.166667	0.111111	-0.714286	NA	NA	NA	NA	NA	NA	0.439519	0.286599	-0.726118	0.544232	0.287124	-0.831355	1.16994	-0.188079	-0.981864	0.216878	-0.057898	-0.15898	NA	NA	NA	0.31696	0.018097	-0.335057	0.240774	0.003774	-0.244548	0.446512	0.043133	-0.489646	0.4176	0.273168	-0.690768	NA	NA	NA	0.417836	0.177018	-0.594855
208309_s_at	MALT1	0.190476	-0.666667	0.142857	0.190476	-0.666667	0.142857	0.764235	-0.747292	-0.016943	0.544402	-0.339837	-0.204564	0.25705	-0.268984	0.011933	0.331237	-0.479677	0.148441	NA	NA	NA	0.355174	-0.35036	-0.004814	0.409254	-0.235494	-0.173759	NA	NA	NA	0.227706	-0.268951	0.041245	0.335309	-0.379897	0.044588	NA	NA	NA	0.268405	-0.260933	-0.007472	NA	NA	NA
208938_at	PRCC	0.047619	-0.222222	0.142857	0.047619	-0.222222	0.142857	0.125182	-0.341304	0.216122	0.031128	-0.197563	0.166435	-0.028399	-0.282831	0.31123	0.003813	-0.082886	0.079073	NA	NA	NA	-0.160932	-0.183473	0.344405	NA	NA	NA	-0.117061	-0.436703	0.553763	NA	NA	NA	-0.210221	-0.353735	0.563957	NA	NA	NA	0.010107	-0.296441	0.286334	-0.168388	-0.282961	0.451349
209344_at	TPM4	0.309524	-0.888889	-0.142857	0.309524	-0.888889	-0.142857	0.408885	-0.379734	-0.029151	0.791169	-0.456471	-0.334699	0.293466	-0.21297	-0.080496	0.269969	-0.142551	-0.127418	NA	NA	NA	0.235745	-0.434922	0.199177	NA	NA	NA	0.389942	-0.626981	0.237038	0.403446	-0.31442	-0.089026	0.388735	-0.700661	0.311927	NA	NA	NA	0.369679	-0.536524	0.166844	NA	NA	NA
210774_s_at	NCOA4	0.428571	-1	0.142857	0.428571	-1	0.142857	0.153833	-0.188097	0.034264	NA	NA	NA	0.207314	-0.198597	-0.008717	0.134191	-0.085074	-0.049117	0.358647	-0.322599	-0.036048	NA	NA	NA	0.10253	-0.159736	0.057206	0.303017	-0.563237	0.260219	0.216527	-0.159932	-0.056595	0.406861	-0.524488	0.117627	0.213285	-0.321425	0.108141	NA	NA	NA	NA	NA	NA
212676_at	NF1	0.0238095	-0.444444	0.571429	0.0238095	-0.444444	0.571429	-0.014091	-0.368671	0.382762	NA	NA	NA	NA	NA	NA	0.052271	-0.107609	0.055338	-0.003106	-0.396817	0.399924	-0.02177	-0.113636	0.135406	-0.018848	-0.337432	0.35628	0.040682	-0.480094	0.439412	NA	NA	NA	NA	NA	NA	0.045573	-0.211205	0.165631	-0.001868	-0.107606	0.109475	-0.04541	-0.214357	0.259767
214709_s_at	KTN1	0.0952381	-0.777778	0.357143	0.0952381	-0.777778	0.357143	0.036941	-0.170518	0.133578	NA	NA	NA	NA	NA	NA	NA	NA	NA	0.034714	-0.405912	0.371198	0.005112	-0.07997	0.074858	-0.032675	-0.228039	0.260714	-0.104336	-0.342632	0.446968	0.045483	-0.142141	0.096658	0.09172	-0.444781	0.353061	0.081692	-0.234318	0.152626	0.05103	-0.141919	0.09089	NA	NA	NA
215088_s_at	SDHC	0.0952381	-0.666667	0.5	0.0952381	-0.666667	0.5	NA	NA	NA	NA	NA	NA	0.086225	-0.300685	0.21446	0.002303	-0.123573	0.121269	NA	NA	NA	0.011222	-0.144076	0.132854	0.034394	-0.488888	0.454494	-0.064744	-0.414301	0.479045	0.02338	-0.193278	0.169899	0.069953	-0.528801	0.458848	-0.033918	-0.358095	0.392013	0.00447	-0.208631	0.20416	NA	NA	NA
215236_s_at	PICALM	0.380952	-1	0	0.380952	-1	0	NA	NA	NA	0.52389	-0.734387	0.210498	0.520969	-0.662485	0.141516	0.47567	-0.51455	0.03888	NA	NA	NA	0.6092	-0.714364	0.105163	NA	NA	NA	NA	NA	NA	0.291521	-0.485785	0.194264	0.326201	-0.622132	0.295931	0.565521	-0.786446	0.220925	0.602617	-0.772361	0.169744	0.61934	-0.677041	0.0577
215904_at	MLLT4	0.047619	0.555556	0.0714286	0.047619	0.555556	0.0714286	NA	NA	NA	NA	NA	NA	-0.055331	0.063796	-0.008464	-0.078942	0.05375	0.025192	-0.008952	0.0107	-0.001748	-0.012633	0.015913	-0.00328	-0.007831	0.009762	-0.001931	-0.037944	0.064341	-0.026397	-0.023521	0.026202	-0.002681	NA	NA	NA	-0.105289	0.077529	0.02776	-0.036377	0.06541	-0.029034	NA	NA	NA
216591_s_at	SDHC	0.190476	-1	0.357143	0.190476	-1	0.357143	-0.071258	-0.405613	0.476871	NA	NA	NA	0.223276	-0.684909	0.461633	0.131277	-0.386447	0.25517	NA	NA	NA	NA	NA	NA	-0.115854	-0.610423	0.726276	0.069859	-0.81133	0.741471	0.049986	-0.373708	0.323722	0.064387	-0.894827	0.83044	0.1114	-0.952413	0.841013	0.333946	-0.710704	0.376759	NA	NA	NA
216645_at	TCF3	0	0.555556	0.214286	0	0.555556	0.214286	-0.119479	0.12916	-0.009681	-0.173002	0.205487	-0.032485	-0.103735	0.160234	-0.056498	-0.048916	0.081401	-0.032484	-0.024348	0.043734	-0.019386	-0.031558	0.053178	-0.02162	NA	NA	NA	NA	NA	NA	-0.047593	0.081598	-0.034006	-0.108258	0.197114	-0.088856	NA	NA	NA	-0.113629	0.192139	-0.07851	NA	NA	NA
216647_at	TCF3	0	0.666667	0.142857	0	0.666667	0.142857	-0.081518	0.138444	-0.056926	-0.101477	0.088848	0.012629	-0.131592	0.142678	-0.011086	NA	NA	NA	-0.115713	0.078872	0.036842	-0.087315	0.131123	-0.043808	-0.224639	0.20099	0.02365	NA	NA	NA	-0.252824	0.226495	0.026329	-0.223438	0.142488	0.08095	NA	NA	NA	-0.061201	0.097394	-0.036193	NA	NA	NA
221732_at	CANT1	0.0238095	-0.666667	0.5	0.0238095	-0.666667	0.5	0.217259	-0.636977	0.419719	NA	NA	NA	-0.056896	-0.263774	0.32067	-0.083442	-0.144351	0.227792	NA	NA	NA	-0.023882	-0.144132	0.168014	0.076775	-0.17625	0.099476	-0.030663	-0.252987	0.28365	NA	NA	NA	0.000508	-0.212955	0.212447	NA	NA	NA	-0.037913	-0.091512	0.129425	-0.201567	-0.240721	0.442288
38964_r_at	WAS	-0.190476	0.444444	-0.285714	-0.190476	0.444444	-0.285714	0.072571	0.10778	-0.180351	NA	NA	NA	-0.025715	0.142168	-0.116454	NA	NA	NA	-0.012897	0.407526	-0.394629	0.0501	0.11511	-0.16521	NA	NA	NA	0.152838	0.195917	-0.348756	-0.02449	0.230158	-0.205668	-0.048474	0.10034	-0.051865	0.155781	0.26265	-0.418431	NA	NA	NA	0.059342	0.227208	-0.28655
40189_at	SET	0.452381	-1	0.5	0.452381	-1	0.5	NA	NA	NA	NA	NA	NA	NA	NA	NA	-0.0772	-0.147194	0.224394	NA	NA	NA	-0.055506	-0.202722	0.258229	-0.052703	-0.23948	0.292183	-0.045866	-0.662301	0.708168	-0.029585	-0.169182	0.198767	0.132087	-0.512235	0.380148	0.125911	-0.291148	0.165237	-0.009214	-0.185081	0.194295	-0.120081	-0.307447	0.427527
200614_at	CLTC	0.309524	-1	0.714286	0.309524	-1	0.714286	NA	NA	NA	NA	NA	NA	0.070508	-0.267128	0.19662	0.013502	-0.095441	0.081939	NA	NA	NA	-0.019402	-0.129852	0.149254	-0.006935	-0.349475	0.356411	0.082663	-0.459652	0.376989	NA	NA	NA	0.125953	-0.408588	0.282635	0.065918	-0.292584	0.226667	NA	NA	NA	-0.134442	-0.281576	0.416017
202312_s_at	COL1A1	0	0.444444	0	0	0.444444	0	-0.009838	0.019675	-0.009838	-0.003761	0.020031	-0.01627	NA	NA	NA	NA	NA	NA	-0.005428	0.010855	-0.005428	0.000768	0.018264	-0.019032	-0.029307	0.087724	-0.058417	-0.03367	0.099752	-0.066082	NA	NA	NA	NA	NA	NA	NA	NA	NA	-0.009675	0.026987	-0.017313	0.0092	0.052053	-0.061253
202370_s_at	CBFB	0.285714	-0.888889	0.5	0.285714	-0.888889	0.5	-0.088822	-0.23966	0.328483	NA	NA	NA	NA	NA	NA	-0.002291	-0.078406	0.080697	-0.001493	-0.37762	0.379113	NA	NA	NA	0.161957	-0.567083	0.405125	0.126266	-0.587099	0.460833	-0.062039	-0.197852	0.259892	NA	NA	NA	NA	NA	NA	0.096001	-0.232574	0.136574	-0.009486	-0.336125	0.345611
202675_at	SDHB	0.333333	-1	0.357143	0.333333	-1	0.357143	NA	NA	NA	NA	NA	NA	0.230375	-0.54279	0.312414	0.061734	-0.237508	0.175773	NA	NA	NA	0.045936	-0.275651	0.229715	0.081821	-0.508974	0.427153	0.059668	-0.680429	0.62076	0.019531	-0.290491	0.27096	0.178823	-0.795594	0.61677	0.073402	-0.446367	0.372965	NA	NA	NA	NA	NA	NA
202816_s_at	SS18	0.0952381	-0.666667	0.285714	0.0952381	-0.666667	0.285714	0.236829	-0.55404	0.31721	NA	NA	NA	0.189249	-0.471845	0.282596	NA	NA	NA	NA	NA	NA	NA	NA	NA	-0.035324	-0.461581	0.496905	0.117555	-0.668147	0.550592	-0.013432	-0.19304	0.206472	-0.080128	-0.411434	0.491562	NA	NA	NA	0.19192	-0.54361	0.35169	-0.009235	-0.496071	0.505305
203525_s_at	APC	0.428571	-1	-0.0714286	0.428571	-1	-0.0714286	NA	NA	NA	NA	NA	NA	0.380062	-0.400193	0.020131	0.211763	-0.137832	-0.073931	0.436705	-0.748226	0.311522	NA	NA	NA	NA	NA	NA	NA	NA	NA	0.138329	-0.215249	0.07692	0.301235	-0.382961	0.081726	0.473168	-0.432609	-0.040559	0.169849	-0.303583	0.133734	0.275797	-0.390538	0.114742
204200_s_at	PDGFB	0.238095	0.333333	-0.928571	0.238095	0.333333	-0.928571	-0.088039	0.220783	-0.132744	NA	NA	NA	-0.071224	0.14824	-0.077015	NA	NA	NA	NA	NA	NA	0.013824	0.049732	-0.063555	NA	NA	NA	0.028471	0.098592	-0.127063	-0.028912	0.139423	-0.110511	-0.067595	0.151031	-0.083436	NA	NA	NA	-0.003475	0.082072	-0.078596	0.134734	0.308259	-0.442993
204891_s_at	LCK	0.047619	0	-0.5	0.047619	0	-0.5	1.0286	-0.249387	-0.77921	0.160101	-0.04713	-0.112971	0.36017	0.071734	-0.431904	0.524638	-0.149432	-0.375205	NA	NA	NA	0.349759	-0.01537	-0.334389	NA	NA	NA	0.52521	0.029961	-0.555171	NA	NA	NA	NA	NA	NA	0.672413	0.50196	-1.17437	NA	NA	NA	0.1196	0.115103	-0.234703
205297_s_at	CD79B	-0.166667	0.111111	-0.642857	-0.166667	0.111111	-0.642857	0.149305	0.180843	-0.330148	NA	NA	NA	-0.015592	0.213125	-0.197532	0.088312	0.098766	-0.187078	NA	NA	NA	-0.001108	0.202345	-0.201237	NA	NA	NA	NA	NA	NA	NA	NA	NA	-0.097114	0.314232	-0.217118	0.156222	0.197534	-0.353756	-0.066272	0.169857	-0.103585	0.030776	0.200169	-0.230945
208129_x_at	RUNX1	-0.642857	0.666667	-0.428571	-0.642857	0.666667	-0.428571	-0.075664	0.074557	0.001107	-0.044097	0.053587	-0.009489	-0.117711	0.215545	-0.097834	NA	NA	NA	-0.438326	0.37646	0.061866	NA	NA	NA	NA	NA	NA	NA	NA	NA	NA	NA	NA	-0.124361	0.210518	-0.086157	-0.218361	0.255098	-0.036737	-0.040973	0.078123	-0.03715	-0.122237	0.101408	0.020829
209289_at	NFIB	0.261905	-0.111111	-0.357143	0.261905	-0.111111	-0.357143	0.55213	0.015748	-0.567877	NA	NA	NA	0.37672	0.104489	-0.481209	0.124331	-0.026758	-0.097574	NA	NA	NA	0.128183	-0.058801	-0.069382	0.045357	0.001718	-0.047075	0.109014	-0.009877	-0.099137	0.525443	-0.037041	-0.488402	NA	NA	NA	0.346346	-0.066139	-0.280207	NA	NA	NA	NA	NA	NA
209552_at	PAX8	-0.285714	0.777778	0.5	-0.285714	0.777778	0.5	NA	NA	NA	-0.017559	0.023128	-0.005569	-0.10645	0.065117	0.041333	NA	NA	NA	-0.469103	0.2484	0.220703	-0.140766	0.13171	0.009056	-0.05299	0.081589	-0.028599	-0.017342	0.012487	0.004855	-0.034357	0.05193	-0.017574	NA	NA	NA	NA	NA	NA	NA	NA	NA	-0.057866	0.104304	-0.046438
210018_x_at	MALT1	0.238095	-0.777778	0.0714286	0.238095	-0.777778	0.0714286	0.590787	-0.587527	-0.00326	NA	NA	NA	0.20663	-0.229737	0.023108	0.323618	-0.490958	0.16734	NA	NA	NA	0.342494	-0.313269	-0.029226	0.371184	-0.187698	-0.183486	NA	NA	NA	0.24007	-0.258671	0.018601	0.15854	-0.290528	0.131988	NA	NA	NA	0.23565	-0.264971	0.029321	NA	NA	NA
210962_s_at	AKAP9	0.119048	0	0.142857	0.119048	0	0.142857	0.055339	-0.629565	0.574226	NA	NA	NA	NA	NA	NA	-0.015133	-0.103259	0.118392	0.27679	-0.626636	0.349846	0.116159	-0.298972	0.182813	-0.117856	-0.177845	0.295702	-0.153613	-0.342752	0.496365	NA	NA	NA	0.050053	-0.349209	0.299157	-0.021686	-0.0818	0.103487	NA	NA	NA	NA	NA	NA
211914_x_at	NF1	-0.047619	0.666667	0	-0.047619	0.666667	0	NA	NA	NA	-0.092934	0.103826	-0.010892	-0.031245	0.044867	-0.013621	-0.015549	0.030825	-0.015276	-0.004148	0.006704	-0.002556	NA	NA	NA	-0.039805	0.040843	-0.001038	NA	NA	NA	-0.010062	0.008759	0.001303	NA	NA	NA	-0.033477	0.048545	-0.015068	-0.018282	0.01418	0.004102	NA	NA	NA
212511_at	PICALM	0.261905	-0.222222	-0.0714286	0.261905	-0.222222	-0.0714286	0.328161	-0.201573	-0.126587	NA	NA	NA	0.439374	-0.265136	-0.174238	NA	NA	NA	0.543745	-0.319856	-0.22389	0.137326	-0.137821	0.000495	0.29684	-0.396855	0.100016	NA	NA	NA	0.226239	-0.276049	0.04981	NA	NA	NA	0.159739	-0.156382	-0.003357	NA	NA	NA	0.345503	-0.212641	-0.132862
212610_at	PTPN11	0.0714286	-0.555556	0.5	0.0714286	-0.555556	0.5	NA	NA	NA	NA	NA	NA	0.11064	-0.250168	0.139528	-0.011009	-0.109238	0.120247	NA	NA	NA	-0.067555	-0.075339	0.142894	-0.027009	-0.287699	0.314709	-0.04564	-0.335132	0.380772	0.008767	-0.170027	0.161259	0.131517	-0.373993	0.242476	NA	NA	NA	0.01217	-0.067094	0.054924	NA	NA	NA
212670_at	ELN	-0.190476	-0.333333	-0.928571	-0.190476	-0.333333	-0.928571	0.70578	0.001237	-0.707017	NA	NA	NA	0.551824	0.289717	-0.841541	0.455846	-0.063059	-0.392787	0.776333	0.17723	-0.953562	NA	NA	NA	NA	NA	NA	0.609831	0.237406	-0.847237	NA	NA	NA	0.286895	0.168865	-0.45576	NA	NA	NA	0.450087	0.20846	-0.658546	0.347401	0.206188	-0.553589
214170_x_at	FH	-0.047619	-0.555556	0.5	-0.047619	-0.555556	0.5	0.013419	-0.149419	0.135999	NA	NA	NA	-0.032812	-0.188061	0.220874	NA	NA	NA	NA	NA	NA	NA	NA	NA	0.038468	-0.503048	0.464581	-0.116254	-0.505533	0.621787	NA	NA	NA	0.094917	-0.359548	0.264631	-0.254575	-0.318549	0.573124	-0.020772	-0.13029	0.151062	-0.028032	-0.278756	0.306788
214617_at	PRF1	0.357143	-0.222222	-0.714286	0.357143	-0.222222	-0.714286	NA	NA	NA	0.702004	-0.210366	-0.491639	NA	NA	NA	0.193796	0.029647	-0.223443	NA	NA	NA	0.532114	-0.149747	-0.382367	NA	NA	NA	0.488771	-0.04888	-0.439891	0.588261	0.062169	-0.65043	0.153296	-0.027201	-0.126095	1.09843	0.143421	-1.24185	NA	NA	NA	0.313445	0.038642	-0.352087
215311_at	NTRK3	-0.047619	0.222222	-0.857143	-0.047619	0.222222	-0.857143	-0.17551	0.351551	-0.176041	NA	NA	NA	-0.062061	0.136751	-0.07469	NA	NA	NA	NA	NA	NA	-0.009725	0.022723	-0.012998	-0.017075	0.052446	-0.03537	-0.027986	0.081632	-0.053646	NA	NA	NA	0.016653	0.047285	-0.063938	0.014462	0.03035	-0.044812	-0.021547	0.106559	-0.085012	NA	NA	NA
216503_s_at	MLLT10	0.0714286	0	0.285714	0.0714286	0	0.285714	NA	NA	NA	-0.014906	-0.110409	0.125315	NA	NA	NA	-0.033064	-0.092017	0.125081	NA	NA	NA	NA	NA	NA	-0.108829	-0.253519	0.362348	-0.172672	-0.264112	0.436784	0.018115	-0.214557	0.196442	-0.059035	-0.191317	0.250352	NA	NA	NA	-0.019181	-0.026562	0.045743	0.023038	-0.298885	0.275848
216928_at	TAL1	0.047619	0.111111	0	0.047619	0.111111	0	-0.002937	0.005873	-0.002937	-0.015387	0.031697	-0.016309	NA	NA	NA	NA	NA	NA	NA	NA	NA	-0.007102	0.014204	-0.007102	NA	NA	NA	-0.009489	0.028788	-0.019298	-0.001453	0.004531	-0.003079	-0.013952	0.038494	-0.024542	NA	NA	NA	-0.0107	0.021399	-0.0107	-0.000517	0.020391	-0.019873
217839_at	TFG	0.166667	-0.777778	0.571429	0.166667	-0.777778	0.571429	NA	NA	NA	NA	NA	NA	0.138118	-0.357678	0.21956	-0.033531	-0.061024	0.094555	NA	NA	NA	0.065588	-0.220537	0.154949	0.00309	-0.217987	0.214897	0.022267	-0.409961	0.387694	NA	NA	NA	0.029836	-0.479921	0.450085	NA	NA	NA	0.075613	-0.161969	0.086355	-0.147958	-0.239757	0.387714
218241_at	GOLGA5	0.261905	-0.888889	0	0.261905	-0.888889	0	0.180257	-0.219665	0.039408	NA	NA	NA	0.243901	-0.364598	0.120697	0.16335	-0.176375	0.013025	0.334354	-0.283863	-0.05049	NA	NA	NA	NA	NA	NA	NA	NA	NA	0.204101	-0.180823	-0.023278	NA	NA	NA	0.345631	-0.196714	-0.148917	0.126517	-0.208553	0.082036	0.143577	-0.210598	0.067021
218648_at	CRTC3	0.5	-0.444444	-0.571429	0.5	-0.444444	-0.571429	0.116932	0.033743	-0.150675	0.077603	0.053773	-0.131375	0.182755	-0.021974	-0.16078	0.129931	-0.019086	-0.110845	NA	NA	NA	NA	NA	NA	0.246394	-0.095308	-0.151087	NA	NA	NA	0.472589	0.12446	-0.597049	0.297734	-0.127019	-0.170716	0.366828	0.139317	-0.506144	NA	NA	NA	NA	NA	NA
218689_at	FANCF	-0.0952381	-0.222222	0.285714	-0.0952381	-0.222222	0.285714	-0.098449	-0.233847	0.332296	NA	NA	NA	NA	NA	NA	NA	NA	NA	NA	NA	NA	0.005842	-0.075663	0.069821	-0.035913	-0.789044	0.824958	-0.206997	-0.294431	0.501428	0.106378	-0.264169	0.157791	0.066076	-0.134151	0.068075	NA	NA	NA	-0.020281	-0.146902	0.167183	-0.236433	-0.490649	0.727082
220773_s_at	GPHN	0	-0.444444	0.357143	0	-0.444444	0.357143	NA	NA	NA	NA	NA	NA	-0.063152	-0.214806	0.277958	-0.088206	-0.375805	0.464011	-0.103991	-0.265417	0.369408	-0.069073	-0.102758	0.171831	-0.083851	-0.115999	0.19985	-0.071442	-0.438672	0.510113	NA	NA	NA	-0.080491	-0.122861	0.203352	-0.2871	-0.698144	0.985244	NA	NA	NA	NA	NA	NA
222079_at	ERG	0.214286	0.222222	0	0.214286	0.222222	0	-0.012191	0.024383	-0.012191	-0.003044	0.006612	-0.003568	NA	NA	NA	0.00085	0.002618	-0.003468	-0.001671	0.003343	-0.001671	-0.000198	0.000395	-0.000198	NA	NA	NA	NA	NA	NA	-0.002846	0.00591	-0.003063	NA	NA	NA	NA	NA	NA	-0.000479	0.000957	-0.000479	0.002096	0.017794	-0.019889
200915_x_at	KTN1	0.142857	-0.666667	0.428571	0.142857	-0.666667	0.428571	NA	NA	NA	NA	NA	NA	NA	NA	NA	NA	NA	NA	0.059516	-0.373876	0.314359	-0.008846	-0.058182	0.067028	-0.031489	-0.216367	0.247857	-0.143995	-0.315201	0.459196	NA	NA	NA	0.106392	-0.353841	0.247449	0.012338	-0.160546	0.148209	-0.013957	-0.077014	0.090971	NA	NA	NA
201011_at	RPN1	0.0238095	-0.333333	0.5	0.0238095	-0.333333	0.5	NA	NA	NA	NA	NA	NA	0.014654	-0.246916	0.232261	NA	NA	NA	NA	NA	NA	NA	NA	NA	-0.010652	-0.308879	0.319531	0.068709	-0.414668	0.34596	0.026789	-0.060906	0.034117	-0.113821	-0.277048	0.390869	NA	NA	NA	0.034957	-0.139331	0.104374	-0.051606	-0.116831	0.168438
201585_s_at	SFPQ	-0.0238095	-0.666667	0.428571	-0.0238095	-0.666667	0.428571	0.050817	-0.214091	0.163274	NA	NA	NA	-0.087229	-0.153396	0.240625	-0.040628	-0.137658	0.178286	NA	NA	NA	NA	NA	NA	NA	NA	NA	-0.150436	-0.475088	0.625524	NA	NA	NA	-0.131522	-0.251505	0.383027	NA	NA	NA	-0.047021	-0.10683	0.153851	-0.244943	-0.308327	0.55327
202012_s_at	EXT2	0.47619	-1	-0.142857	0.47619	-1	-0.142857	0.203985	-0.348257	0.144272	0.396316	-0.298199	-0.098117	0.323184	-0.300237	-0.022947	NA	NA	NA	NA	NA	NA	0.206398	-0.327936	0.121538	NA	NA	NA	NA	NA	NA	0.311973	-0.284347	-0.027626	0.361613	-0.470184	0.108571	NA	NA	NA	0.174772	-0.16285	-0.011922	NA	NA	NA
202102_s_at	BRD4	-0.333333	1	-0.214286	-0.333333	1	-0.214286	NA	NA	NA	NA	NA	NA	-0.278929	0.392163	-0.113234	-0.124819	0.131604	-0.006785	-0.898635	0.449428	0.449207	NA	NA	NA	-0.49887	0.271496	0.227374	NA	NA	NA	-0.179533	0.190312	-0.010779	-0.271511	0.201804	0.069707	NA	NA	NA	NA	NA	NA	-0.424611	0.370283	0.054329
202310_s_at	COL1A1	0.166667	0.111111	-0.214286	0.166667	0.111111	-0.214286	0.843558	0.064989	-0.908547	2.30701	-0.612872	-1.69414	0.732153	0.144944	-0.877097	0.55228	0.047285	-0.599565	NA	NA	NA	0.452181	0.009251	-0.461432	NA	NA	NA	NA	NA	NA	NA	NA	NA	0.456553	0.062223	-0.518776	NA	NA	NA	0.39083	0.32221	-0.71304	NA	NA	NA
202315_s_at	BCR	-0.0238095	0	0.142857	-0.0238095	0	0.142857	NA	NA	NA	-0.277975	-0.129769	0.407744	NA	NA	NA	NA	NA	NA	NA	NA	NA	-0.281386	0.100178	0.181208	-0.238473	-0.172242	0.410716	NA	NA	NA	-0.105698	-0.010332	0.11603	-0.141006	0.000839	0.140167	-0.23992	-0.079618	0.319538	NA	NA	NA	-0.075663	-0.039876	0.115539
202817_s_at	SS18	0.261905	-1	0.285714	0.261905	-1	0.285714	NA	NA	NA	NA	NA	NA	NA	NA	NA	NA	NA	NA	NA	NA	NA	NA	NA	NA	-0.139902	-0.330873	0.470775	0.103976	-0.684646	0.580671	-0.039169	-0.121789	0.160959	-0.119237	-0.508876	0.628113	0.189258	-0.405831	0.216573	0.234016	-0.547281	0.313264	0.23468	-0.520148	0.285468
203265_s_at	MAP2K4	0.0238095	-1	0.357143	0.0238095	-1	0.357143	NA	NA	NA	0.00031	-0.242512	0.242201	NA	NA	NA	NA	NA	NA	0.060766	-0.266967	0.206202	0.133265	-0.333774	0.200509	0.085373	-0.170878	0.085505	0.088789	-0.570744	0.481955	NA	NA	NA	0.079605	-0.282302	0.202697	NA	NA	NA	0.081397	-0.165921	0.084524	NA	NA	NA
203526_s_at	APC	0.142857	-0.555556	-0.0714286	0.142857	-0.555556	-0.0714286	NA	NA	NA	NA	NA	NA	0.147423	-0.164034	0.01661	0.210325	-0.150011	-0.060314	NA	NA	NA	NA	NA	NA	NA	NA	NA	NA	NA	NA	0.19766	-0.261118	0.063458	0.092028	-0.14493	0.052903	0.54121	-0.372651	-0.168559	0.128137	-0.25388	0.125743	0.231787	-0.433456	0.201668
203639_s_at	FGFR2	0.0952381	-0.777778	0.357143	0.0952381	-0.777778	0.357143	0.05978	-0.32083	0.26105	NA	NA	NA	-0.031738	-0.192206	0.223944	NA	NA	NA	NA	NA	NA	-0.029235	-0.083284	0.112519	NA	NA	NA	0.175167	-0.497593	0.322427	NA	NA	NA	-0.249071	-0.285176	0.534246	-0.040107	-0.600917	0.641024	0.057548	-0.521486	0.463937	NA	NA	NA
203796_s_at	BCL7A	-0.261905	0.111111	0.357143	-0.261905	0.111111	0.357143	NA	NA	NA	-0.503558	0.220036	0.283522	NA	NA	NA	-0.088659	-0.009007	0.097666	NA	NA	NA	NA	NA	NA	-0.324307	0.078277	0.24603	-0.37412	0.044163	0.329957	-0.2401	-0.065228	0.305327	NA	NA	NA	NA	NA	NA	-0.2819	0.013485	0.268414	-0.245584	-0.00069	0.246274
204009_s_at	KRAS	0.214286	-0.777778	0.214286	0.214286	-0.777778	0.214286	NA	NA	NA	NA	NA	NA	NA	NA	NA	NA	NA	NA	NA	NA	NA	-0.022039	-0.194818	0.216856	-0.06086	-0.077477	0.138337	0.024006	-0.748526	0.724521	-0.002702	-0.186756	0.189458	0.073867	-0.615013	0.541146	NA	NA	NA	0.011936	-0.196734	0.184798	0.149785	-0.483043	0.333258
204908_s_at	BCL3	-0.047619	0.444444	-0.357143	-0.047619	0.444444	-0.357143	NA	NA	NA	NA	NA	NA	0.039154	0.074883	-0.114037	0.025464	0.13084	-0.156304	NA	NA	NA	0.00425	0.150758	-0.155008	0.116429	0.205444	-0.321873	NA	NA	NA	NA	NA	NA	0.044342	0.256249	-0.300591	NA	NA	NA	0.035653	0.043883	-0.079536	0.141279	0.147431	-0.288709
205841_at	JAK2	0.166667	-0.333333	-0.285714	0.166667	-0.333333	-0.285714	NA	NA	NA	NA	NA	NA	0.121224	-0.074152	-0.047072	0.368729	-0.185147	-0.183582	NA	NA	NA	0.152595	-0.12498	-0.027615	0.151964	-0.298112	0.146149	0.2615	-0.206395	-0.055105	NA	NA	NA	0.251073	-0.133438	-0.117635	0.325449	-0.166003	-0.159446	NA	NA	NA	NA	NA	NA
205879_x_at	RET	0.047619	0.333333	0.0714286	0.047619	0.333333	0.0714286	NA	NA	NA	-0.041967	0.06382	-0.021853	NA	NA	NA	NA	NA	NA	NA	NA	NA	-0.032771	0.045657	-0.012886	-0.065377	0.121021	-0.055644	NA	NA	NA	-0.006523	0.01269	-0.006168	-0.064064	0.080871	-0.016807	-0.056806	0.043167	0.013639	NA	NA	NA	-0.077729	0.117025	-0.039297
207822_at	FGFR1	0.0714286	0.555556	0.0714286	0.0714286	0.555556	0.0714286	-0.035957	0.072823	-0.036866	-0.012521	0.233117	-0.220596	NA	NA	NA	-0.024155	0.052693	-0.028539	-0.01249	0.02498	-0.01249	NA	NA	NA	NA	NA	NA	NA	NA	NA	NA	NA	NA	NA	NA	NA	0.013859	0.065405	-0.079264	-0.11649	0.280848	-0.164358	-0.016055	0.20422	-0.188165
207978_s_at	NR4A3	0.261905	0.111111	0	0.261905	0.111111	0	0.113769	0.003093	-0.116862	0.093	-0.023497	-0.069503	NA	NA	NA	0.200459	0.141897	-0.342356	NA	NA	NA	0.139697	-0.021356	-0.118341	NA	NA	NA	0.25737	-0.082533	-0.174837	NA	NA	NA	0.238972	-0.003566	-0.235405	NA	NA	NA	NA	NA	NA	0.168871	0.164491	-0.333362
208586_s_at	SSX4	0	0.444444	0.0714286	0	0.444444	0.0714286	-0.046943	0.084186	-0.037243	-0.009362	0.017455	-0.008093	-0.02187	0.030757	-0.008887	NA	NA	NA	-0.524617	0.554079	-0.029463	NA	NA	NA	NA	NA	NA	-0.020045	0.027719	-0.007675	NA	NA	NA	NA	NA	NA	-0.026319	0.019299	0.00702	NA	NA	NA	-0.026418	0.038939	-0.012521
208986_at	TCF12	0.166667	-0.777778	0.357143	0.166667	-0.777778	0.357143	0.047232	-0.25634	0.209108	NA	NA	NA	NA	NA	NA	-0.027161	-0.051235	0.078396	NA	NA	NA	NA	NA	NA	-0.083717	-0.537833	0.62155	-0.088812	-0.402148	0.49096	0.099543	-0.228943	0.1294	0.194304	-0.450367	0.256063	NA	NA	NA	NA	NA	NA	0.027129	-0.361204	0.334075
209193_at	PIM1	-0.142857	0.555556	-0.142857	-0.142857	0.555556	-0.142857	NA	NA	NA	NA	NA	NA	0.109983	0.200831	-0.310814	NA	NA	NA	NA	NA	NA	NA	NA	NA	0.003147	0.13678	-0.139928	0.062919	0.06938	-0.132299	0.003725	0.25151	-0.255235	NA	NA	NA	0.058321	0.064504	-0.122825	0.095186	0.168503	-0.263689	-0.027518	0.198843	-0.171325
209855_s_at	KLK2	0.0238095	0.222222	0.0714286	0.0238095	0.222222	0.0714286	-0.066956	0.130155	-0.0632	NA	NA	NA	-0.054677	0.096817	-0.04214	-0.015961	0.022145	-0.006184	NA	NA	NA	-0.030188	0.055664	-0.025476	NA	NA	NA	-0.034539	0.050764	-0.016225	NA	NA	NA	-0.068979	0.132519	-0.06354	-0.045083	0.066406	-0.021323	NA	NA	NA	NA	NA	NA
209895_at	PTPN11	0.0238095	-0.777778	0.571429	0.0238095	-0.777778	0.571429	NA	NA	NA	0.061141	-0.293413	0.232273	0.115964	-0.29011	0.174145	0.135154	-0.420041	0.284887	NA	NA	NA	-0.00932	-0.16494	0.174261	NA	NA	NA	-0.002871	-0.663903	0.666774	-0.051471	-0.278418	0.329889	-0.184124	-0.268264	0.452388	NA	NA	NA	NA	NA	NA	NA	NA	NA
211179_at	RUNX1	0	0.333333	0	0	0.333333	0	-0.011627	0.023255	-0.011627	-0.003907	0.017087	-0.01318	NA	NA	NA	NA	NA	NA	-0.006226	0.012453	-0.006226	-0.001939	0.012297	-0.010359	-0.003176	0.012297	-0.009122	-0.010934	0.023727	-0.012793	NA	NA	NA	-0.011447	0.04281	-0.031363	NA	NA	NA	NA	NA	NA	NA	NA	NA
211300_s_at	TP53	-0.309524	-1	-0.214286	-0.309524	-1	-0.214286	0.017271	-0.217137	0.199866	0.118405	-0.269826	0.151421	-0.009034	-0.183971	0.193005	0.224528	-0.478814	0.254286	NA	NA	NA	NA	NA	NA	NA	NA	NA	0.053956	-0.390462	0.336506	NA	NA	NA	0.063951	-0.312628	0.248677	NA	NA	NA	NA	NA	NA	-0.273937	-0.386075	0.660012
211400_at	FGFR2	0	0.222222	0	0	0.222222	0	-0.002408	0.00501	-0.002602	-0.022277	0.045035	-0.022758	NA	NA	NA	NA	NA	NA	NA	NA	NA	-0.006925	0.019692	-0.012766	-0.000405	0.010392	-0.009987	NA	NA	NA	-0.000517	0.004138	-0.003621	-0.026944	0.059586	-0.032643	NA	NA	NA	-0.000782	0.001836	-0.001054	NA	NA	NA
211808_s_at	CREBBP	0.0714286	0.333333	0.142857	0.0714286	0.333333	0.142857	NA	NA	NA	-0.070244	0.064799	0.005445	NA	NA	NA	-0.007931	0.006038	0.001893	NA	NA	NA	NA	NA	NA	NA	NA	NA	-0.041746	0.032225	0.009521	-0.007103	0.012647	-0.005544	-0.028912	0.02517	0.003742	-0.051675	0.032258	0.019417	NA	NA	NA	-0.04332	0.060584	-0.017264
212151_at	PBX1	0.047619	-0.444444	0.285714	0.047619	-0.444444	0.285714	0.082104	-0.176388	0.094284	NA	NA	NA	0.00718	-0.117628	0.110448	NA	NA	NA	NA	NA	NA	NA	NA	NA	NA	NA	NA	-0.044015	-0.310398	0.354414	NA	NA	NA	0.030844	-0.250642	0.219798	0.02348	-0.417	0.39352	0.014326	-0.073349	0.059023	0.044477	-0.152905	0.108428
212196_at	IL6ST	0.261905	-1	-0.214286	0.261905	-1	-0.214286	NA	NA	NA	0.392216	-0.47506	0.082844	0.470547	-0.471011	0.000464	NA	NA	NA	NA	NA	NA	0.365596	-0.236954	-0.128642	NA	NA	NA	0.502252	-0.286905	-0.215346	NA	NA	NA	0.434306	-0.344346	-0.08996	0.440258	-0.387172	-0.053086	0.438748	-0.290804	-0.147944	NA	NA	NA
212413_at	2006-09-01	0.0238095	0	-0.0714286	0.0238095	0	-0.0714286	0.172617	0.113925	-0.286542	0.20322	0.12329	-0.32651	0.242434	-0.019762	-0.222672	0.303237	0.023266	-0.326503	0.128851	0.114825	-0.243676	NA	NA	NA	NA	NA	NA	0.165597	-0.032099	-0.133498	NA	NA	NA	0.106417	-0.015078	-0.091339	NA	NA	NA	NA	NA	NA	NA	NA	NA
212481_s_at	TPM4	0.190476	-0.555556	-0.428571	0.190476	-0.555556	-0.428571	0.29375	-0.322837	0.029086	NA	NA	NA	0.181917	-0.159645	-0.022272	0.314614	-0.23306	-0.081554	NA	NA	NA	0.29871	-0.425015	0.126305	NA	NA	NA	0.322998	-0.527831	0.204833	0.21784	-0.161428	-0.056412	NA	NA	NA	NA	NA	NA	0.272889	-0.324544	0.051655	NA	NA	NA
212506_at	PICALM	0.166667	-0.111111	0.0714286	0.166667	-0.111111	0.0714286	0.019952	-0.026924	0.006972	NA	NA	NA	0.215687	-0.108531	-0.107155	NA	NA	NA	0.107286	-0.157813	0.050526	0.13309	-0.123509	-0.009581	0.155098	-0.217175	0.062077	NA	NA	NA	NA	NA	NA	0.182252	-0.249685	0.067433	0.080909	-0.114854	0.033944	NA	NA	NA	NA	NA	NA
212678_at	NF1	0.238095	-1	0.428571	0.238095	-1	0.428571	0.056579	-0.556387	0.499808	NA	NA	NA	NA	NA	NA	0.095746	-0.196225	0.100479	0.237086	-0.624661	0.387574	-0.07821	-0.081549	0.159759	-0.060974	-0.162829	0.223803	0.025609	-0.528215	0.502606	NA	NA	NA	0.14235	-0.309067	0.166718	NA	NA	NA	NA	NA	NA	NA	NA	NA
212784_at	CIC	-0.0952381	0.666667	0	-0.0952381	0.666667	0	NA	NA	NA	NA	NA	NA	NA	NA	NA	NA	NA	NA	-0.403696	0.35951	0.044186	-0.036855	0.036912	-5.7e-05	-0.287013	0.269395	0.017618	NA	NA	NA	-0.146789	0.243005	-0.096216	-0.294214	0.28893	0.005285	-0.201353	0.223424	-0.022071	NA	NA	NA	-0.145115	0.081719	0.063396
213281_at	JUN	0.0714286	0.111111	-0.642857	0.0714286	0.111111	-0.642857	NA	NA	NA	NA	NA	NA	0.038967	0.219232	-0.258198	NA	NA	NA	NA	NA	NA	-0.013526	0.133765	-0.120239	NA	NA	NA	NA	NA	NA	-0.044146	0.197712	-0.153566	0.010683	0.057316	-0.068	0.159069	0.164601	-0.32367	-0.002242	0.289813	-0.287571	0.336942	0.36473	-0.701672
214166_at	SDHB	0.119048	0.333333	0.142857	0.119048	0.333333	0.142857	-0.00596	0.009995	-0.004035	-0.031629	0.047844	-0.016214	-0.019457	0.030311	-0.010854	NA	NA	NA	NA	NA	NA	-0.00901	0.015024	-0.006014	NA	NA	NA	NA	NA	NA	-0.015161	0.018729	-0.003569	-0.024113	0.035524	-0.01141	NA	NA	NA	-0.008787	0.016913	-0.008126	NA	NA	NA
214513_s_at	CREB1	0.047619	-0.222222	0.0714286	0.047619	-0.222222	0.0714286	-0.020425	-0.128907	0.149332	NA	NA	NA	NA	NA	NA	0.133718	-0.302499	0.168781	NA	NA	NA	NA	NA	NA	-0.174189	-0.204249	0.378437	0.03801	-0.550331	0.512321	0.026464	-0.371624	0.34516	-0.017581	-0.167728	0.185309	NA	NA	NA	NA	NA	NA	0.113307	-0.488735	0.375428
214815_at	TRIM33	-0.380952	0.777778	0	-0.380952	0.777778	0	NA	NA	NA	NA	NA	NA	-0.03898	0.057374	-0.018394	-0.187386	0.289685	-0.102298	NA	NA	NA	NA	NA	NA	NA	NA	NA	-0.151031	0.163521	-0.01249	-0.027959	0.025948	0.002011	-0.10359	0.120387	-0.016798	-0.205111	0.324466	-0.119355	-0.067676	0.123917	-0.056241	NA	NA	NA
215605_at	NCOA2	-0.52381	1	-0.214286	-0.52381	1	-0.214286	NA	NA	NA	-0.221467	0.174194	0.047273	-0.134887	0.184879	-0.049992	-0.122757	0.18644	-0.063683	NA	NA	NA	NA	NA	NA	-0.035158	0.061666	-0.026508	NA	NA	NA	NA	NA	NA	-0.108051	0.190662	-0.082612	-0.337741	0.368141	-0.0304	-0.518421	0.760223	-0.241802	NA	NA	NA
215832_x_at	PICALM	0.261905	-1	0.0714286	0.261905	-1	0.0714286	NA	NA	NA	0.198581	-0.235848	0.037267	0.182894	-0.186715	0.003821	0.194283	-0.123379	-0.070903	NA	NA	NA	0.171935	-0.17612	0.004186	NA	NA	NA	0.226802	-0.438109	0.211307	NA	NA	NA	NA	NA	NA	NA	NA	NA	0.278208	-0.276952	-0.001256	0.319959	-0.287687	-0.032272
216061_x_at	PDGFB	0.119048	0.444444	-0.928571	0.119048	0.444444	-0.928571	NA	NA	NA	0.021538	0.208654	-0.230192	NA	NA	NA	0.041962	0.058942	-0.100904	0.024611	0.098831	-0.123442	NA	NA	NA	-0.050019	0.133032	-0.083014	0.040815	0.270453	-0.311268	NA	NA	NA	NA	NA	NA	NA	NA	NA	-0.065599	0.134005	-0.068406	0.033482	0.368218	-0.401699
216115_at	NF1	-0.714286	0.666667	-0.142857	-0.714286	0.666667	-0.142857	NA	NA	NA	NA	NA	NA	-0.076317	0.094452	-0.018134	-0.239125	0.390807	-0.151682	NA	NA	NA	-0.004923	0.007267	-0.002345	NA	NA	NA	-0.105581	0.110464	-0.004883	NA	NA	NA	-0.184206	0.321218	-0.137012	NA	NA	NA	-0.217776	0.298492	-0.080716	-0.17368	0.092438	0.081242
216300_x_at	RARA	-0.047619	0.777778	-0.642857	-0.047619	0.777778	-0.642857	-0.09283	0.229077	-0.136247	NA	NA	NA	NA	NA	NA	NA	NA	NA	NA	NA	NA	-0.046975	0.116802	-0.069827	-0.036491	0.073058	-0.036566	-0.010372	0.197687	-0.187315	-0.014732	0.08567	-0.070938	-0.015167	0.330712	-0.315545	NA	NA	NA	-0.041797	0.103082	-0.061285	NA	NA	NA
217886_at	EPS15	0.309524	-0.777778	0.214286	0.309524	-0.777778	0.214286	0.321549	-0.258142	-0.063407	NA	NA	NA	0.391807	-0.197682	-0.194124	NA	NA	NA	0.668499	-0.389829	-0.27867	0.145633	-0.167941	0.022308	NA	NA	NA	0.168502	-0.168237	-0.000265	0.17402	-0.163669	-0.01035	0.274319	-0.3257	0.051382	NA	NA	NA	NA	NA	NA	NA	NA	NA
217887_s_at	EPS15	0.380952	-0.555556	-0.214286	0.380952	-0.555556	-0.214286	0.409097	-0.25847	-0.150626	NA	NA	NA	0.266376	-0.208297	-0.058079	NA	NA	NA	0.271641	-0.217898	-0.053743	0.186113	-0.194667	0.008554	NA	NA	NA	NA	NA	NA	0.168862	-0.142531	-0.026331	0.223458	-0.32902	0.105562	NA	NA	NA	0.084869	-0.168126	0.083257	NA	NA	NA
219530_at	PALB2	-0.190476	-0.333333	0.5	-0.190476	-0.333333	0.5	-0.060195	-0.091477	0.151672	NA	NA	NA	0.050364	-0.14724	0.096877	NA	NA	NA	NA	NA	NA	NA	NA	NA	0.036256	-0.304919	0.268662	-0.151426	-0.450165	0.601591	-0.056591	-0.210006	0.266597	-0.083366	-0.154993	0.238359	0.077509	-0.167385	0.089875	NA	NA	NA	NA	NA	NA
219661_at	RANBP17	-0.309524	0.555556	0.285714	-0.309524	0.555556	0.285714	NA	NA	NA	-0.207411	0.28458	-0.077169	-0.082131	0.050373	0.031758	NA	NA	NA	NA	NA	NA	-0.011176	0.016459	-0.005283	-0.066286	0.066284	2e-06	NA	NA	NA	NA	NA	NA	NA	NA	NA	-0.231245	0.128817	0.102429	-0.118715	0.091014	0.027701	-0.174072	0.188116	-0.014044
219840_s_at	TCL6	0.047619	0.333333	0.0714286	0.047619	0.333333	0.0714286	NA	NA	NA	NA	NA	NA	-0.027631	0.042443	-0.014812	NA	NA	NA	-0.006966	0.005126	0.00184	-0.025784	0.041535	-0.015751	-0.079963	0.127366	-0.047403	NA	NA	NA	NA	NA	NA	-0.030939	0.034077	-0.003138	NA	NA	NA	-0.011227	0.020048	-0.00882	-0.014474	0.014336	0.000138
221768_at	SFPQ	-0.190476	0.888889	0.142857	-0.190476	0.888889	0.142857	NA	NA	NA	-0.063881	0.038218	0.025663	NA	NA	NA	-0.312509	0.47755	-0.165041	NA	NA	NA	NA	NA	NA	-0.263721	0.15759	0.106131	-0.229205	0.156531	0.072674	-0.234665	0.422497	-0.187832	-0.482397	0.369437	0.11296	NA	NA	NA	-0.19703	0.242988	-0.045958	NA	NA	NA
222103_at	ATF1	0.309524	-1	0.214286	0.309524	-1	0.214286	0.225387	-0.35008	0.124692	0.225142	-0.172694	-0.052448	0.412041	-0.554254	0.142213	NA	NA	NA	0.462543	-0.305993	-0.15655	NA	NA	NA	NA	NA	NA	NA	NA	NA	NA	NA	NA	NA	NA	NA	0.311151	-0.367906	0.056756	0.171893	-0.335057	0.163163	0.361132	-0.341355	-0.019777
36829_at	PER1	-0.119048	0.777778	-0.642857	-0.119048	0.777778	-0.642857	NA	NA	NA	NA	NA	NA	0.046644	0.129102	-0.175746	0.116345	0.12793	-0.244275	NA	NA	NA	NA	NA	NA	-0.004131	0.185511	-0.18138	0.032331	0.307955	-0.340286	0.017228	0.09723	-0.114458	0.066621	0.130022	-0.196643	NA	NA	NA	NA	NA	NA	0.035332	0.432872	-0.468204
46323_at	CANT1	0.0238095	-0.777778	0.571429	0.0238095	-0.777778	0.571429	0.290132	-0.657587	0.367455	NA	NA	NA	-0.027368	-0.286145	0.313513	-0.066928	-0.164429	0.231357	NA	NA	NA	0.042058	-0.264685	0.222627	NA	NA	NA	0.051007	-0.284574	0.233567	NA	NA	NA	0.027322	-0.35184	0.324518	NA	NA	NA	NA	NA	NA	-0.169467	-0.248335	0.417801
50221_at	TFEB	-0.166667	1	-0.285714	-0.166667	1	-0.285714	NA	NA	NA	NA	NA	NA	NA	NA	NA	0.063149	0.110736	-0.173884	-0.157032	0.886814	-0.729782	-0.004862	0.012529	-0.007667	NA	NA	NA	NA	NA	NA	0.029453	0.178498	-0.20795	0.059003	0.157887	-0.216891	0.013029	0.140742	-0.153771	NA	NA	NA	0.238317	0.318905	-0.557222
200057_s_at	NONO	0.238095	-0.666667	0.357143	0.238095	-0.666667	0.357143	-0.074592	-0.235799	0.310391	NA	NA	NA	0.037434	-0.138402	0.100968	NA	NA	NA	NA	NA	NA	0.024979	-0.098802	0.073824	NA	NA	NA	-0.102714	-0.281153	0.383867	NA	NA	NA	-0.075896	-0.1772	0.253096	NA	NA	NA	-0.023777	-0.048082	0.071859	NA	NA	NA
200603_at	PRKAR1A	0.428571	-0.888889	0.357143	0.428571	-0.888889	0.357143	0.227628	-0.142843	-0.084785	NA	NA	NA	0.220167	-0.300045	0.079878	NA	NA	NA	0.359071	-0.258689	-0.100382	0.080909	-0.05275	-0.028159	NA	NA	NA	NA	NA	NA	0.140729	-0.141629	0.000901	0.427559	-0.575586	0.148027	NA	NA	NA	NA	NA	NA	NA	NA	NA
200604_s_at	PRKAR1A	0.190476	-1	0.285714	0.190476	-1	0.285714	0.302865	-0.652723	0.349858	NA	NA	NA	0.280777	-0.741042	0.460265	NA	NA	NA	NA	NA	NA	NA	NA	NA	0.095486	-0.992144	0.896657	0.368291	-0.87413	0.505839	0.136944	-0.369545	0.232601	0.363935	-0.764836	0.400902	NA	NA	NA	NA	NA	NA	NA	NA	NA
200912_s_at	EIF4A2	0.0714286	-0.555556	0.428571	0.0714286	-0.555556	0.428571	NA	NA	NA	NA	NA	NA	NA	NA	NA	NA	NA	NA	0.150487	-0.365739	0.215252	0.007944	-0.07474	0.066796	NA	NA	NA	-0.12047	-0.23738	0.35785	0.008539	-0.098355	0.089816	0.052024	-0.3576	0.305576	0.118503	-0.247297	0.128794	NA	NA	NA	NA	NA	NA
201193_at	IDH1	0.142857	-1	0.285714	0.142857	-1	0.285714	NA	NA	NA	NA	NA	NA	NA	NA	NA	-0.077031	-0.109749	0.18678	NA	NA	NA	NA	NA	NA	0.38056	-0.844958	0.464398	0.18189	-0.758651	0.576761	NA	NA	NA	0.141408	-0.546825	0.405417	NA	NA	NA	0.04764	-0.108147	0.060507	-0.004612	-0.178719	0.183331
201335_s_at	ARHGEF12	0.428571	-0.888889	-0.214286	0.428571	-0.888889	-0.214286	NA	NA	NA	NA	NA	NA	NA	NA	NA	NA	NA	NA	0.203625	-0.345022	0.141397	NA	NA	NA	0.089346	-0.067504	-0.021843	0.07216	-0.096251	0.024091	0.024879	-0.018876	-0.006003	0.070416	-0.113062	0.042646	NA	NA	NA	NA	NA	NA	0.138608	-0.101284	-0.037324
201495_x_at	MYH11	0.0952381	0	0	0.0952381	0	0	NA	NA	NA	NA	NA	NA	0.010918	0.000331	-0.011248	0.382258	0.059517	-0.441775	0.341593	0.002936	-0.344528	NA	NA	NA	0.003196	0.002746	-0.005941	NA	NA	NA	NA	NA	NA	0.09883	-0.028317	-0.070514	0.057958	-0.017853	-0.040105	NA	NA	NA	NA	NA	NA
201648_at	JAK1	0.452381	-0.888889	0.142857	0.452381	-0.888889	0.142857	0.247318	-0.264312	0.016994	0.190437	-0.117269	-0.073168	0.40588	-0.204847	-0.201034	NA	NA	NA	NA	NA	NA	0.207178	-0.141102	-0.066076	NA	NA	NA	0.344194	-0.484816	0.140622	NA	NA	NA	0.435005	-0.490121	0.055116	NA	NA	NA	NA	NA	NA	NA	NA	NA
201662_s_at	ACSL3	0.190476	-0.777778	0.214286	0.190476	-0.777778	0.214286	NA	NA	NA	NA	NA	NA	0.193099	-0.416524	0.223425	-0.043735	-0.097003	0.140737	NA	NA	NA	NA	NA	NA	NA	NA	NA	0.123757	-0.602574	0.478817	0.10006	-0.28007	0.18001	0.051427	-0.423991	0.372564	-0.115785	-0.260653	0.376438	NA	NA	NA	NA	NA	NA
201700_at	CCND3	0.119048	-0.222222	-0.142857	0.119048	-0.222222	-0.142857	0.293647	-0.422417	0.12877	0.233368	-0.121438	-0.11193	0.122806	-0.102338	-0.020468	NA	NA	NA	NA	NA	NA	0.160205	-0.242027	0.081822	NA	NA	NA	0.255742	-0.258157	0.002415	NA	NA	NA	0.108321	-0.142531	0.03421	NA	NA	NA	NA	NA	NA	NA	NA	NA
203685_at	BCL2	0.190476	0.111111	0	0.190476	0.111111	0	NA	NA	NA	NA	NA	NA	NA	NA	NA	0.273053	0.040797	-0.313849	1.17779	-0.563138	-0.614649	NA	NA	NA	NA	NA	NA	NA	NA	NA	0.403272	0.252066	-0.655338	0.351246	-0.091319	-0.259927	0.660921	-0.265676	-0.395244	NA	NA	NA	0.667526	-0.068145	-0.599381
203806_s_at	FANCA	-0.0952381	0.444444	0.142857	-0.0952381	0.444444	0.142857	-0.232421	0.312035	-0.079614	-0.089826	0.068973	0.020852	-0.05577	0.032965	0.022804	NA	NA	NA	NA	NA	NA	-0.01623	0.018325	-0.002094	NA	NA	NA	NA	NA	NA	NA	NA	NA	NA	NA	NA	-0.092502	0.131392	-0.03889	-0.15428	0.100557	0.053723	NA	NA	NA
203825_at	BRD3	-0.404762	1	0.5	-0.404762	1	0.5	NA	NA	NA	-0.420357	0.259912	0.160445	-0.05114	0.079052	-0.027912	-0.103706	0.109494	-0.005788	NA	NA	NA	NA	NA	NA	NA	NA	NA	NA	NA	NA	NA	NA	NA	-0.26494	0.213948	0.050992	-0.118385	0.1213	-0.002915	NA	NA	NA	-0.362242	0.228888	0.133354
204323_x_at	NF1	-0.690476	0.222222	-0.285714	-0.690476	0.222222	-0.285714	NA	NA	NA	-0.128821	0.107095	0.021726	-0.055552	0.07917	-0.023619	-0.05486	0.08009	-0.02523	NA	NA	NA	NA	NA	NA	NA	NA	NA	NA	NA	NA	NA	NA	NA	-0.01083	0.017688	-0.006858	NA	NA	NA	-0.029259	0.057407	-0.028148	-0.043469	0.037005	0.006464
204369_at	PIK3CA	0.261905	-0.777778	0.214286	0.261905	-0.777778	0.214286	NA	NA	NA	NA	NA	NA	0.289321	-0.364496	0.075175	0.222178	-0.253281	0.031104	NA	NA	NA	NA	NA	NA	NA	NA	NA	NA	NA	NA	0.156234	-0.294336	0.138102	NA	NA	NA	0.364279	-0.381114	0.016835	0.286394	-0.310235	0.023841	0.378794	-0.483307	0.104514
204784_s_at	MLF1	0	-0.555556	0.428571	0	-0.555556	0.428571	NA	NA	NA	NA	NA	NA	0.124046	-0.397868	0.273823	NA	NA	NA	NA	NA	NA	-0.060745	-0.151404	0.21215	NA	NA	NA	-0.134484	-0.616682	0.751166	NA	NA	NA	-0.056712	-0.530559	0.587272	-0.172048	-0.349614	0.521662	0.006973	-0.288892	0.281919	NA	NA	NA
204832_s_at	BMPR1A	0.0238095	-0.444444	0	0.0238095	-0.444444	0	NA	NA	NA	NA	NA	NA	0.237983	-0.284187	0.046204	0.16747	-0.233316	0.065846	0.326794	-0.307808	-0.018986	NA	NA	NA	NA	NA	NA	NA	NA	NA	NA	NA	NA	NA	NA	NA	0.218518	-0.361171	0.142653	0.19605	-0.315797	0.119747	0.202392	-0.266908	0.064515
204863_s_at	IL6ST	-0.0714286	0.666667	-0.142857	-0.0714286	0.666667	-0.142857	NA	NA	NA	NA	NA	NA	-0.035629	0.137043	-0.101413	NA	NA	NA	NA	NA	NA	0.003931	0.029967	-0.033898	-0.060031	0.254549	-0.194518	NA	NA	NA	NA	NA	NA	NA	NA	NA	0.215011	0.360154	-0.575165	-0.115656	0.521798	-0.406142	0.18381	0.231236	-0.415046
204909_at	DDX6	-0.761905	0.777778	-0.142857	-0.761905	0.777778	-0.142857	-0.037519	0.066516	-0.028997	-0.082926	0.119164	-0.036238	-0.051311	0.084411	-0.0331	-0.066724	0.098388	-0.031664	NA	NA	NA	NA	NA	NA	-0.219578	0.169057	0.050521	NA	NA	NA	NA	NA	NA	-0.114069	0.160328	-0.046259	NA	NA	NA	NA	NA	NA	NA	NA	NA
205253_at	PBX1	-0.166667	-0.222222	0.142857	-0.166667	-0.222222	0.142857	0.069031	-0.279481	0.210449	NA	NA	NA	0.026193	-0.337732	0.311539	NA	NA	NA	NA	NA	NA	NA	NA	NA	NA	NA	NA	-0.169933	-0.376425	0.546358	NA	NA	NA	-0.051201	-0.215368	0.266569	-0.156082	-0.277766	0.433848	NA	NA	NA	-0.148622	-0.165112	0.313734
205263_at	BCL10	0.261905	-0.777778	-0.142857	0.261905	-0.777778	-0.142857	NA	NA	NA	NA	NA	NA	0.246904	-0.354091	0.107187	NA	NA	NA	NA	NA	NA	NA	NA	NA	0.17967	-0.204517	0.024848	0.153088	-0.243622	0.090534	0.191838	-0.195313	0.003474	NA	NA	NA	0.182872	-0.155177	-0.027695	0.13717	-0.178232	0.041062	NA	NA	NA
205385_at	MDM2	0	0.444444	0	0	0.444444	0	-0.007005	0.01401	-0.007005	0.000188	0.000744	-0.000933	NA	NA	NA	NA	NA	NA	NA	NA	NA	NA	NA	NA	-0.008156	0.017977	-0.009821	0.003264	0.00974	-0.013005	NA	NA	NA	-0.002138	0.015712	-0.013574	NA	NA	NA	-0.002971	0.005943	-0.002971	NA	NA	NA
205667_at	WRN	-0.214286	0.222222	0.571429	-0.214286	0.222222	0.571429	-0.167978	0.013176	0.154803	NA	NA	NA	NA	NA	NA	-0.05414	-0.040089	0.094229	NA	NA	NA	NA	NA	NA	NA	NA	NA	-0.241238	-0.187329	0.428567	NA	NA	NA	-0.178737	0.036494	0.142244	NA	NA	NA	-0.240499	0.050273	0.190225	-0.423846	-0.201123	0.624969
205732_s_at	NCOA2	-0.428571	-0.666667	-0.357143	-0.428571	-0.666667	-0.357143	NA	NA	NA	-0.050524	-0.231144	0.281668	0.10475	-0.223902	0.119152	NA	NA	NA	NA	NA	NA	0.032302	-0.09031	0.058008	NA	NA	NA	0.066998	-0.565359	0.498361	NA	NA	NA	-0.011963	-0.043866	0.055829	0.212085	-0.5488	0.336715	NA	NA	NA	NA	NA	NA
206044_s_at	BRAF	-0.285714	0.555556	0.214286	-0.285714	0.555556	0.214286	-0.070918	0.099381	-0.028463	NA	NA	NA	-0.124068	0.092809	0.031259	NA	NA	NA	NA	NA	NA	-0.052051	0.060088	-0.008037	-0.048768	0.051501	-0.002734	NA	NA	NA	NA	NA	NA	-0.190757	0.2402	-0.049442	NA	NA	NA	-0.092953	0.125769	-0.032816	NA	NA	NA
206283_s_at	TAL1	0.119048	0.444444	-0.642857	0.119048	0.444444	-0.642857	NA	NA	NA	0.018081	0.122317	-0.140398	-0.002209	0.045283	-0.043074	NA	NA	NA	NA	NA	NA	NA	NA	NA	NA	NA	NA	0.049544	0.0506	-0.100143	NA	NA	NA	-0.013891	0.065724	-0.051833	NA	NA	NA	-0.018606	0.037211	-0.018606	-0.039745	0.213435	-0.17369
206462_s_at	NTRK3	-0.261905	0	-0.928571	-0.261905	0	-0.928571	-0.166144	0.338261	-0.172117	NA	NA	NA	-0.03351	0.08464	-0.05113	NA	NA	NA	-0.002238	0.004475	-0.002238	NA	NA	NA	-0.006562	0.023204	-0.016642	NA	NA	NA	NA	NA	NA	-0.003612	0.049773	-0.046161	0.013532	0.046599	-0.060131	NA	NA	NA	NA	NA	NA
206607_at	CBL	0.047619	0.222222	0	0.047619	0.222222	0	-0.024299	0.048598	-0.024299	0.00152	0.002694	-0.004214	NA	NA	NA	NA	NA	NA	-0.003649	0.007299	-0.003649	-0.003888	0.012024	-0.008136	-0.048634	0.116998	-0.068363	NA	NA	NA	NA	NA	NA	-0.019742	0.040534	-0.020792	NA	NA	NA	NA	NA	NA	NA	NA	NA
206802_at	PAX5	0.0238095	0.222222	0.142857	0.0238095	0.222222	0.142857	NA	NA	NA	-0.022783	0.038336	-0.015554	-0.095398	0.125299	-0.029901	-0.010742	0.017313	-0.006571	NA	NA	NA	-0.021963	0.041594	-0.019631	NA	NA	NA	NA	NA	NA	-0.147865	0.105636	0.042229	NA	NA	NA	-0.072542	0.097278	-0.024736	NA	NA	NA	NA	NA	NA
207727_s_at	MUTYH	-0.285714	0.777778	0.0714286	-0.285714	0.777778	0.0714286	-0.222266	0.112378	0.109887	NA	NA	NA	-0.057633	0.060231	-0.002598	NA	NA	NA	-0.210679	0.348841	-0.138163	-0.122953	0.083342	0.039611	NA	NA	NA	NA	NA	NA	-0.162425	0.0984	0.064025	-0.246904	0.145963	0.100941	NA	NA	NA	NA	NA	NA	NA	NA	NA
207894_s_at	TCL6	0	0.333333	0.0714286	0	0.333333	0.0714286	NA	NA	NA	NA	NA	NA	-0.012869	0.019988	-0.007118	NA	NA	NA	NA	NA	NA	NA	NA	NA	-0.04796	0.080311	-0.032351	-0.01264	0.024575	-0.011936	NA	NA	NA	NA	NA	NA	-0.056023	0.053302	0.002721	-0.011553	0.022096	-0.010543	-0.01573	0.020573	-0.004842
207954_at	GATA2	0	0.111111	0.0714286	0	0.111111	0.0714286	NA	NA	NA	-0.010865	0.020583	-0.009719	-0.04413	0.058922	-0.014792	-0.036203	0.037107	-0.000905	NA	NA	NA	NA	NA	NA	-0.05147	0.099167	-0.047697	NA	NA	NA	-0.002852	0.00427	-0.001419	-0.029641	0.040137	-0.010496	NA	NA	NA	NA	NA	NA	NA	NA	NA
208025_s_at	HMGA2	0	0.111111	0.285714	0	0.111111	0.285714	NA	NA	NA	NA	NA	NA	-0.06676	-0.001952	0.068711	NA	NA	NA	-1.12568	-0.79595	1.92163	-0.40579	-0.117028	0.522818	NA	NA	NA	NA	NA	NA	NA	NA	NA	-0.505999	-0.007973	0.513972	-0.43164	-0.21523	0.646871	-0.527807	0.003754	0.524054	NA	NA	NA
208286_x_at	POU5F1	-0.142857	0.777778	-0.5	-0.142857	0.777778	-0.5	NA	NA	NA	-0.005652	0.044117	-0.038465	NA	NA	NA	NA	NA	NA	NA	NA	NA	-0.019753	0.081131	-0.061378	-0.089825	0.196483	-0.106658	-0.046351	0.195435	-0.149084	NA	NA	NA	NA	NA	NA	0.336868	0.401822	-0.73869	-0.024254	0.061432	-0.037177	NA	NA	NA
208348_s_at	CBLB	0.0238095	0.111111	0	0.0238095	0.111111	0	NA	NA	NA	-0.00021	0.000944	-0.000734	NA	NA	NA	NA	NA	NA	NA	NA	NA	-0.000151	0.000586	-0.000436	NA	NA	NA	0.000259	0.008948	-0.009207	-0.001206	0.005545	-0.004338	-0.002945	0.014353	-0.011408	NA	NA	NA	-0.000876	0.00183	-0.000953	NA	NA	NA
209052_s_at	WHSC1	0	0	0.0714286	0	0	0.0714286	NA	NA	NA	NA	NA	NA	NA	NA	NA	-0.122398	-0.226839	0.349237	NA	NA	NA	-0.005397	-0.036383	0.04178	-0.058752	-0.071934	0.130686	-0.215187	-0.478727	0.693915	NA	NA	NA	NA	NA	NA	-0.038583	-0.044792	0.083375	0.159488	-0.349593	0.190105	NA	NA	NA
209106_at	NCOA1	0.214286	0.111111	-0.285714	0.214286	0.111111	-0.285714	NA	NA	NA	NA	NA	NA	0.339175	-0.137181	-0.201994	0.116777	0.028594	-0.145371	NA	NA	NA	0.164794	-0.081395	-0.0834	NA	NA	NA	NA	NA	NA	0.470116	-0.056597	-0.413519	NA	NA	NA	NA	NA	NA	0.307228	0.062301	-0.36953	0.259816	0.150679	-0.410495
209290_s_at	NFIB	0.166667	0.111111	-0.214286	0.166667	0.111111	-0.214286	0.484843	0.151235	-0.636078	NA	NA	NA	0.28104	0.253046	-0.534086	0.081298	0.022374	-0.103672	NA	NA	NA	NA	NA	NA	0.076582	-0.019058	-0.057523	NA	NA	NA	0.617309	-0.064957	-0.552351	NA	NA	NA	0.273785	-0.023913	-0.249872	NA	NA	NA	NA	NA	NA
209359_x_at	RUNX1	-0.595238	0.444444	-0.571429	-0.595238	0.444444	-0.571429	-0.040682	0.073598	-0.032916	NA	NA	NA	NA	NA	NA	-0.037086	0.062949	-0.025863	-0.194267	0.210285	-0.016018	NA	NA	NA	NA	NA	NA	NA	NA	NA	NA	NA	NA	-0.078471	0.10742	-0.028949	-0.203855	0.308879	-0.105025	NA	NA	NA	-0.034601	0.037557	-0.002956
209778_at	TRIP11	0.0238095	-0.444444	-0.142857	0.0238095	-0.444444	-0.142857	NA	NA	NA	NA	NA	NA	0.173474	-0.161257	-0.012217	NA	NA	NA	0.200431	-0.24219	0.041759	NA	NA	NA	NA	NA	NA	NA	NA	NA	0.09332	-0.125329	0.03201	NA	NA	NA	0.135229	-0.219676	0.084447	0.033572	-0.044806	0.011234	0.207856	-0.19788	-0.009977
210339_s_at	KLK2	0.0952381	0.222222	0	0.0952381	0.222222	0	-0.055647	0.11643	-0.060783	NA	NA	NA	NA	NA	NA	-0.001931	0.010495	-0.008564	-0.010471	0.026548	-0.016076	NA	NA	NA	NA	NA	NA	NA	NA	NA	-0.008399	0.017004	-0.008605	NA	NA	NA	-0.021256	0.051996	-0.03074	NA	NA	NA	0.006763	0.013633	-0.020396
210446_at	GATA1	0	0.222222	0.0714286	0	0.222222	0.0714286	NA	NA	NA	-0.003415	0.00616	-0.002745	-0.007741	0.011332	-0.003592	-0.0033	0.006215	-0.002915	NA	NA	NA	-0.010754	0.021096	-0.010342	NA	NA	NA	NA	NA	NA	-0.001454	0.001314	0.00014	NA	NA	NA	NA	NA	NA	NA	NA	NA	-0.034468	0.056613	-0.022145
211399_at	FGFR2	0.047619	0.111111	0	0.047619	0.111111	0	NA	NA	NA	-0.033725	0.113529	-0.079803	NA	NA	NA	NA	NA	NA	0.001058	0.116552	-0.117611	0.010155	0.027665	-0.03782	-0.059572	0.170669	-0.111097	NA	NA	NA	-0.025123	0.065107	-0.039984	NA	NA	NA	NA	NA	NA	-0.021536	0.1339	-0.112365	NA	NA	NA
211449_at	MSH6	0	0.333333	0	0	0.333333	0	NA	NA	NA	-0.00021	0.000944	-0.000734	NA	NA	NA	NA	NA	NA	-0.001528	0.003055	-0.001528	NA	NA	NA	0.001613	0.006767	-0.00838	-0.00227	0.007063	-0.004793	-0.002839	0.006408	-0.003568	-0.001419	0.014036	-0.012617	NA	NA	NA	NA	NA	NA	NA	NA	NA
211466_at	NFIB	-0.357143	0.555556	-0.214286	-0.357143	0.555556	-0.214286	-0.045645	0.062288	-0.016643	NA	NA	NA	-0.177368	0.269626	-0.092258	-0.102919	0.13086	-0.027942	NA	NA	NA	-0.00354	0.001977	0.001563	NA	NA	NA	-0.217154	0.25896	-0.041806	NA	NA	NA	-0.089053	0.115726	-0.026674	NA	NA	NA	NA	NA	NA	NA	NA	NA
211551_at	EGFR	0.047619	0.555556	0	0.047619	0.555556	0	NA	NA	NA	NA	NA	NA	-0.046135	0.099129	-0.052994	NA	NA	NA	-0.064158	0.129865	-0.065707	NA	NA	NA	-0.034453	0.088518	-0.054066	-0.018509	0.069459	-0.05095	NA	NA	NA	-0.025996	0.138419	-0.112424	NA	NA	NA	NA	NA	NA	-0.012688	0.047276	-0.034588
212167_s_at	SMARCB1	0.261905	-0.555556	0.357143	0.261905	-0.555556	0.357143	-0.019434	-0.283696	0.30313	-0.16349	-0.218405	0.381894	0.045902	-0.097098	0.051196	0.01334	-0.116419	0.103079	NA	NA	NA	NA	NA	NA	NA	NA	NA	NA	NA	NA	NA	NA	NA	-0.104844	-0.172589	0.277434	NA	NA	NA	0.037913	-0.322477	0.284564	NA	NA	NA
212195_at	IL6ST	0.547619	-0.888889	-0.0714286	0.547619	-0.888889	-0.0714286	NA	NA	NA	NA	NA	NA	0.395071	-0.279724	-0.115347	NA	NA	NA	0.727647	-0.481225	-0.246422	0.397021	-0.251558	-0.145462	NA	NA	NA	0.495407	-0.32111	-0.174296	NA	NA	NA	0.837584	-0.674461	-0.163123	0.338706	-0.190643	-0.148062	NA	NA	NA	NA	NA	NA
212287_at	SUZ12	-0.142857	-0.444444	0.571429	-0.142857	-0.444444	0.571429	0.026377	-0.208426	0.182049	NA	NA	NA	0.076582	-0.313949	0.237367	NA	NA	NA	0.002068	-0.103895	0.101827	-0.046056	-0.099975	0.146031	NA	NA	NA	NA	NA	NA	NA	NA	NA	-0.024866	-0.494876	0.519743	0.062835	-0.205644	0.142809	NA	NA	NA	NA	NA	NA
212672_at	ATM	0.285714	-0.222222	-0.285714	0.285714	-0.222222	-0.285714	NA	NA	NA	0.119008	0.01056	-0.129568	0.328493	-0.08297	-0.245522	0.137921	0.03038	-0.168301	NA	NA	NA	0.020375	-0.000736	-0.01964	NA	NA	NA	NA	NA	NA	0.106891	-0.027401	-0.07949	NA	NA	NA	0.473296	0.112462	-0.585757	NA	NA	NA	NA	NA	NA
212867_at	NCOA2	0.0952381	-0.333333	0.357143	0.0952381	-0.333333	0.357143	0.118732	-0.304728	0.185997	NA	NA	NA	NA	NA	NA	NA	NA	NA	NA	NA	NA	0.01315	-0.077326	0.064177	NA	NA	NA	0.032958	-0.334329	0.301371	NA	NA	NA	0.036415	-0.30008	0.263665	0.013025	-0.116023	0.102998	-0.046811	-0.105133	0.151944	NA	NA	NA
213029_at	NFIB	0.404762	-0.666667	-0.0714286	0.404762	-0.666667	-0.0714286	NA	NA	NA	NA	NA	NA	NA	NA	NA	0.159845	-0.115609	-0.044236	0.903336	-0.961753	0.058417	0.125165	-0.14087	0.015705	NA	NA	NA	0.116841	-0.112061	-0.00478	NA	NA	NA	0.525439	-0.45186	-0.073579	0.441074	-0.237166	-0.203908	NA	NA	NA	NA	NA	NA
213048_s_at	SET	0.238095	-1	0.5	0.238095	-1	0.5	NA	NA	NA	NA	NA	NA	-0.023158	-0.10883	0.131988	NA	NA	NA	NA	NA	NA	0.032423	-0.1505	0.118076	NA	NA	NA	-0.221131	-0.246952	0.468083	NA	NA	NA	0.04649	-0.296557	0.250067	0.076956	-0.172636	0.09568	-0.083777	-0.087658	0.171436	NA	NA	NA
213229_at	DICER1	-0.190476	1	0.142857	-0.190476	1	0.142857	NA	NA	NA	NA	NA	NA	NA	NA	NA	-0.114464	0.202515	-0.088051	NA	NA	NA	-0.306074	0.331269	-0.025195	NA	NA	NA	-0.183024	0.122818	0.060206	-0.080058	0.09776	-0.017701	NA	NA	NA	-0.115432	0.153391	-0.037959	-0.284711	0.257053	0.027658	NA	NA	NA
214130_s_at	PDE4DIP	0.142857	-0.666667	0	0.142857	-0.666667	0	NA	NA	NA	NA	NA	NA	0.27617	-0.353578	0.077408	0.221052	-0.341631	0.120579	NA	NA	NA	0.070999	-0.045897	-0.025102	NA	NA	NA	NA	NA	NA	0.029261	-0.045956	0.016695	NA	NA	NA	NA	NA	NA	0.017517	-0.017502	-1.5e-05	0.261735	-0.324301	0.062566
214352_s_at	KRAS	0.047619	-0.555556	0.428571	0.047619	-0.555556	0.428571	NA	NA	NA	0.011542	-0.03162	0.020078	-0.043675	-0.133057	0.176732	0.013195	-0.075003	0.061808	NA	NA	NA	NA	NA	NA	NA	NA	NA	-0.092796	-0.205927	0.298724	NA	NA	NA	0.009359	-0.304515	0.295156	NA	NA	NA	NA	NA	NA	-0.07037	-0.290316	0.360686
214634_at	HIST1H4I	0.0238095	0.555556	0.142857	0.0238095	0.555556	0.142857	NA	NA	NA	-0.043488	0.03946	0.004029	-0.136438	0.163228	-0.02679	-0.048816	0.028911	0.019904	NA	NA	NA	-0.02265	0.040564	-0.017913	NA	NA	NA	-0.056678	0.097548	-0.04087	NA	NA	NA	NA	NA	NA	NA	NA	NA	-0.087917	0.100865	-0.012948	NA	NA	NA
215025_at	NTRK3	0.142857	0.222222	0	0.142857	0.222222	0	-0.193962	0.388332	-0.194369	NA	NA	NA	-0.020912	0.051339	-0.030426	NA	NA	NA	NA	NA	NA	-0.008087	0.016597	-0.008511	-0.003392	0.028697	-0.025305	NA	NA	NA	NA	NA	NA	-0.035357	0.08871	-0.053354	NA	NA	NA	-0.000568	0.003883	-0.003315	NA	NA	NA
215038_s_at	SETD2	-0.0238095	-0.222222	0.571429	-0.0238095	-0.222222	0.571429	0.195199	-0.400074	0.204875	-0.037674	-0.094587	0.132262	NA	NA	NA	NA	NA	NA	-0.054204	-0.33942	0.393624	-0.045502	-0.113765	0.159267	NA	NA	NA	-0.017017	-0.289193	0.306211	NA	NA	NA	NA	NA	NA	-0.134719	-0.210273	0.344992	NA	NA	NA	NA	NA	NA
215483_at	AKAP9	-0.285714	0.888889	0	-0.285714	0.888889	0	NA	NA	NA	-0.131104	0.20461	-0.073506	NA	NA	NA	-0.417214	0.517841	-0.100627	NA	NA	NA	-0.018175	0.029719	-0.011545	NA	NA	NA	NA	NA	NA	-0.168236	0.231153	-0.062917	-0.170746	0.238373	-0.067627	-0.131079	0.150336	-0.019256	NA	NA	NA	NA	NA	NA
215771_x_at	RET	0.0238095	0.111111	0	0.0238095	0.111111	0	-0.01177	0.02354	-0.01177	-0.00669	0.076829	-0.070139	NA	NA	NA	NA	NA	NA	-0.024851	0.049702	-0.024851	-0.02307	0.053823	-0.030752	-0.03014	0.066514	-0.036374	NA	NA	NA	NA	NA	NA	0.004542	0.061283	-0.065825	NA	NA	NA	NA	NA	NA	NA	NA	NA
216269_s_at	ELN	0.047619	0.444444	0	0.047619	0.444444	0	NA	NA	NA	NA	NA	NA	0.015571	0.044725	-0.060296	NA	NA	NA	-0.024493	0.048985	-0.024493	0.000658	0.00385	-0.004508	NA	NA	NA	0.062619	0.17016	-0.232779	NA	NA	NA	NA	NA	NA	-0.019615	0.057523	-0.037908	NA	NA	NA	-0.020516	0.204183	-0.183667
216281_at	DICER1	0	0.222222	0	0	0.222222	0	NA	NA	NA	-0.00021	0.000944	-0.000734	NA	NA	NA	NA	NA	NA	NA	NA	NA	-0.000686	0.001371	-0.000686	0.002457	0.006732	-0.009189	-0.001636	0.007325	-0.005689	-0.004957	0.011871	-0.006914	0.00034	0.00956	-0.0099	NA	NA	NA	NA	NA	NA	NA	NA	NA
216933_x_at	APC	-0.5	0.222222	-0.285714	-0.5	0.222222	-0.285714	-0.02344	0.02844	-0.005001	NA	NA	NA	-0.037402	0.059161	-0.021759	-0.11245	0.216327	-0.103877	NA	NA	NA	-0.034112	0.061891	-0.027779	NA	NA	NA	-0.054691	0.055179	-0.000487	NA	NA	NA	NA	NA	NA	NA	NA	NA	-0.053342	0.084493	-0.031151	NA	NA	NA
217223_s_at	BCR	-0.0714286	0.111111	0.214286	-0.0714286	0.111111	0.214286	NA	NA	NA	NA	NA	NA	NA	NA	NA	NA	NA	NA	-0.435577	0.188632	0.246946	-0.100547	-0.092114	0.192661	-0.188302	-0.094505	0.282807	NA	NA	NA	-0.065036	-0.034684	0.09972	NA	NA	NA	-0.304537	-0.204724	0.509262	NA	NA	NA	-0.04202	-0.012392	0.054412
217373_x_at	MDM2	-0.0238095	0.333333	0.214286	-0.0238095	0.333333	0.214286	NA	NA	NA	NA	NA	NA	-0.069649	0.045171	0.024478	NA	NA	NA	-0.185772	0.107675	0.078096	-0.045145	0.064578	-0.019433	-0.029082	0.047069	-0.017987	NA	NA	NA	NA	NA	NA	-0.040938	0.078793	-0.037855	NA	NA	NA	-0.019944	0.029156	-0.009212	NA	NA	NA
218996_at	TFPT	-0.0238095	-0.111111	0.214286	-0.0238095	-0.111111	0.214286	-0.2194	-0.424373	0.643774	NA	NA	NA	0.123873	-0.34107	0.217196	NA	NA	NA	NA	NA	NA	NA	NA	NA	-0.051408	-0.251943	0.303351	-0.055001	-0.325098	0.3801	NA	NA	NA	-0.097468	-0.207055	0.304523	NA	NA	NA	0.041952	-0.204871	0.162919	NA	NA	NA
219285_s_at	NIN	0.0952381	0.222222	0.0714286	0.0952381	0.222222	0.0714286	-0.030544	0.07353	-0.042986	-0.046746	0.141388	-0.094642	NA	NA	NA	NA	NA	NA	NA	NA	NA	-0.001	0.014557	-0.013558	-0.019662	0.090057	-0.070395	NA	NA	NA	NA	NA	NA	NA	NA	NA	NA	NA	NA	-0.006145	0.014022	-0.007877	0.031343	0.038871	-0.070214
220386_s_at	EML4	0.0714286	-0.777778	0.214286	0.0714286	-0.777778	0.214286	0.015094	-0.557713	0.542619	NA	NA	NA	NA	NA	NA	0.084023	-0.50541	0.421387	NA	NA	NA	0.12372	-0.319466	0.195745	NA	NA	NA	0.174116	-0.746741	0.572625	NA	NA	NA	-0.154967	-0.317635	0.472602	NA	NA	NA	NA	NA	NA	0.081086	-0.700949	0.619863
200618_at	LASP1	0.166667	-0.555556	0.142857	0.166667	-0.555556	0.142857	0.221598	-0.293034	0.071436	NA	NA	NA	0.090325	-0.130798	0.040473	NA	NA	NA	NA	NA	NA	0.012546	-0.025088	0.012542	NA	NA	NA	NA	NA	NA	NA	NA	NA	0.16201	-0.223438	0.061429	0.283923	-0.15232	-0.131603	NA	NA	NA	NA	NA	NA
200630_x_at	SET	-0.190476	0	0.357143	-0.190476	0	0.357143	NA	NA	NA	NA	NA	NA	NA	NA	NA	NA	NA	NA	-0.30271	-0.164525	0.467235	NA	NA	NA	-0.287204	-0.006526	0.293729	-0.207393	-0.13848	0.345873	NA	NA	NA	-0.143279	0.033086	0.110193	NA	NA	NA	NA	NA	NA	-0.307384	0.038935	0.268449
200921_s_at	BTG1	0.380952	-0.888889	-0.285714	0.380952	-0.888889	-0.285714	0.21406	-0.200984	-0.013076	NA	NA	NA	0.294066	-0.171995	-0.122071	NA	NA	NA	0.345596	-0.190961	-0.154635	0.091186	-0.05827	-0.032916	NA	NA	NA	NA	NA	NA	NA	NA	NA	0.499977	-0.601263	0.101286	NA	NA	NA	NA	NA	NA	NA	NA	NA
201244_s_at	RAF1	-0.0952381	-0.111111	0.428571	-0.0952381	-0.111111	0.428571	NA	NA	NA	NA	NA	NA	0.039841	-0.10484	0.065	-0.000697	-0.016378	0.017075	NA	NA	NA	NA	NA	NA	NA	NA	NA	0.054179	-0.247709	0.19353	NA	NA	NA	-0.021885	-0.230475	0.252359	NA	NA	NA	-0.001788	-0.025241	0.027029	NA	NA	NA
201466_s_at	JUN	0.452381	-0.888889	-0.571429	0.452381	-0.888889	-0.571429	0.817056	-0.674681	-0.142375	0.484955	-0.274279	-0.210676	NA	NA	NA	NA	NA	NA	NA	NA	NA	0.524044	-0.357999	-0.166044	NA	NA	NA	0.259621	-0.291734	0.032113	NA	NA	NA	0.196069	-0.321468	0.125399	NA	NA	NA	NA	NA	NA	NA	NA	NA
201661_s_at	ACSL3	0.0952381	-0.222222	0.142857	0.0952381	-0.222222	0.142857	0.067053	-0.15642	0.089366	NA	NA	NA	NA	NA	NA	NA	NA	NA	NA	NA	NA	NA	NA	NA	0.031118	-0.342318	0.3112	0.061823	-0.346141	0.284318	NA	NA	NA	0.037548	-0.269904	0.232357	-0.030631	-0.123102	0.153733	NA	NA	NA	NA	NA	NA
201730_s_at	TPR	-0.357143	0.888889	-0.0714286	-0.357143	0.888889	-0.0714286	NA	NA	NA	NA	NA	NA	-0.098772	0.100579	-0.001807	-0.130703	0.083761	0.046942	NA	NA	NA	-0.311676	0.244456	0.06722	NA	NA	NA	NA	NA	NA	NA	NA	NA	-0.105308	0.168325	-0.063017	NA	NA	NA	-0.25619	0.211235	0.044955	NA	NA	NA
201851_at	SH3GL1	-0.047619	0.555556	-0.428571	-0.047619	0.555556	-0.428571	NA	NA	NA	0.00117	0.012001	-0.013171	0.012176	0.045965	-0.058141	-0.012697	0.037896	-0.025199	NA	NA	NA	NA	NA	NA	NA	NA	NA	NA	NA	NA	0.088082	0.121024	-0.209106	0.065817	0.077958	-0.143774	NA	NA	NA	NA	NA	NA	NA	NA	NA
202174_s_at	PCM1	0.142857	-0.111111	-0.0714286	0.142857	-0.111111	-0.0714286	NA	NA	NA	NA	NA	NA	0.302853	-0.240844	-0.062009	0.073535	-0.050608	-0.022926	0.294888	-0.541049	0.246161	NA	NA	NA	NA	NA	NA	NA	NA	NA	NA	NA	NA	0.252423	-0.318337	0.065914	0.256253	-0.151533	-0.10472	NA	NA	NA	NA	NA	NA
202648_at	RPS19	-0.380952	0.666667	0	-0.380952	0.666667	0	-0.189657	0.156645	0.033012	-0.043982	0.050173	-0.00619	-0.19861	0.323821	-0.125211	NA	NA	NA	-0.136081	0.148741	-0.012661	NA	NA	NA	NA	NA	NA	NA	NA	NA	NA	NA	NA	NA	NA	NA	NA	NA	NA	-0.200158	0.266616	-0.066458	NA	NA	NA
202840_at	TAF15	-0.166667	0.444444	0.642857	-0.166667	0.444444	0.642857	NA	NA	NA	NA	NA	NA	NA	NA	NA	-0.15797	-0.066586	0.224555	NA	NA	NA	-0.176212	0.083955	0.092257	-0.209798	-0.155696	0.365494	-0.19325	-0.058598	0.251847	NA	NA	NA	-0.176997	-0.049737	0.226733	NA	NA	NA	NA	NA	NA	NA	NA	NA
203266_s_at	MAP2K4	0.119048	-0.777778	0.357143	0.119048	-0.777778	0.357143	NA	NA	NA	NA	NA	NA	NA	NA	NA	NA	NA	NA	NA	NA	NA	NA	NA	NA	0.003832	-0.299753	0.295921	-0.012684	-0.49285	0.505534	NA	NA	NA	0.071605	-0.221242	0.149637	0.136344	-0.281169	0.144824	-0.039781	-0.143573	0.183354	NA	NA	NA
203409_at	DDB2	0.119048	0.111111	0.0714286	0.119048	0.111111	0.0714286	0.261901	-0.130838	-0.131063	0.711043	-0.129571	-0.581473	0.154148	-0.017394	-0.136754	NA	NA	NA	NA	NA	NA	NA	NA	NA	NA	NA	NA	NA	NA	NA	NA	NA	NA	NA	NA	NA	0.843743	0.09531	-0.939053	NA	NA	NA	0.069083	0.033493	-0.102576
203750_s_at	RARA	-0.0952381	0.444444	-0.142857	-0.0952381	0.444444	-0.142857	NA	NA	NA	NA	NA	NA	NA	NA	NA	-0.033329	0.068699	-0.03537	-0.080995	0.49743	-0.416435	-0.004087	0.04297	-0.038883	NA	NA	NA	-0.012402	0.103717	-0.091316	NA	NA	NA	NA	NA	NA	NA	NA	NA	-0.041321	0.160889	-0.119568	NA	NA	NA
204129_at	BCL9	-0.0952381	0.444444	0	-0.0952381	0.444444	0	NA	NA	NA	NA	NA	NA	-0.033981	0.025924	0.008057	NA	NA	NA	-0.071133	0.105976	-0.034842	-0.033575	0.017418	0.016157	NA	NA	NA	NA	NA	NA	-0.035463	0.040054	-0.004591	-0.085369	0.046349	0.03902	NA	NA	NA	NA	NA	NA	NA	NA	NA
204312_x_at	CREB1	0.0952381	-0.666667	0	0.0952381	-0.666667	0	NA	NA	NA	NA	NA	NA	0.24666	-0.363539	0.116879	0.173169	-0.342607	0.169438	NA	NA	NA	0.343973	-0.361463	0.01749	NA	NA	NA	NA	NA	NA	NA	NA	NA	NA	NA	NA	0.538495	-0.602664	0.064169	0.257978	-0.334221	0.076243	NA	NA	NA
204313_s_at	CREB1	0.309524	-1	0	0.309524	-1	0	NA	NA	NA	NA	NA	NA	0.394827	-0.461677	0.06685	0.165257	-0.189642	0.024385	NA	NA	NA	0.312222	-0.358966	0.046744	NA	NA	NA	NA	NA	NA	NA	NA	NA	NA	NA	NA	0.507297	-0.494183	-0.013113	0.26242	-0.447791	0.185371	NA	NA	NA
204314_s_at	CREB1	0.238095	-0.888889	-0.285714	0.238095	-0.888889	-0.285714	NA	NA	NA	NA	NA	NA	0.247687	-0.188916	-0.058771	0.016438	-0.024746	0.008308	0.079423	-0.061348	-0.018076	0.109967	-0.115938	0.005971	NA	NA	NA	NA	NA	NA	NA	NA	NA	NA	NA	NA	0.252336	-0.228664	-0.023672	NA	NA	NA	NA	NA	NA
204917_s_at	MLLT3	0.0714286	-0.444444	0.571429	0.0714286	-0.444444	0.571429	-0.049178	-0.15159	0.200768	NA	NA	NA	NA	NA	NA	-0.078546	-0.225744	0.30429	NA	NA	NA	-0.071591	-0.083088	0.154679	NA	NA	NA	-0.123644	-0.205609	0.329253	NA	NA	NA	NA	NA	NA	NA	NA	NA	NA	NA	NA	0.014486	-0.626659	0.612173
205102_at	TMPRSS2	0	0.222222	0.285714	0	0.222222	0.285714	NA	NA	NA	NA	NA	NA	-0.009931	0.003914	0.006017	-0.178698	-0.035659	0.214357	NA	NA	NA	NA	NA	NA	NA	NA	NA	NA	NA	NA	NA	NA	NA	-0.062405	-0.003911	0.066316	-0.553259	-0.032449	0.585708	-0.007191	0.002082	0.005109	NA	NA	NA
205400_at	WAS	0.047619	0.444444	0.0714286	0.047619	0.444444	0.0714286	NA	NA	NA	NA	NA	NA	NA	NA	NA	-0.041948	0.064081	-0.022133	NA	NA	NA	NA	NA	NA	NA	NA	NA	-0.028642	0.053659	-0.025017	NA	NA	NA	-0.103185	0.091921	0.011265	-0.060229	0.083262	-0.023033	-0.010295	0.02036	-0.010065	NA	NA	NA
205408_at	MLLT10	0.0714286	-0.555556	-0.0714286	0.0714286	-0.555556	-0.0714286	NA	NA	NA	0.084763	-0.112553	0.027791	0.037946	-0.069143	0.031197	NA	NA	NA	NA	NA	NA	NA	NA	NA	NA	NA	NA	NA	NA	NA	NA	NA	NA	NA	NA	NA	0.222443	-0.334977	0.112534	0.142778	-0.181281	0.038504	0.105396	-0.202942	0.097546
205672_at	XPA	0.333333	-0.777778	0.0714286	0.333333	-0.777778	0.0714286	NA	NA	NA	NA	NA	NA	0.249831	-0.221511	-0.02832	0.052011	-0.092361	0.04035	0.472074	-0.464484	-0.00759	NA	NA	NA	NA	NA	NA	NA	NA	NA	NA	NA	NA	0.212749	-0.329756	0.117007	0.126631	-0.234409	0.107778	NA	NA	NA	NA	NA	NA
205944_s_at	CLTCL1	-0.0238095	0.333333	0.214286	-0.0238095	0.333333	0.214286	-0.096258	0.069017	0.027241	-0.127853	0.117722	0.010132	-0.071231	0.084047	-0.012816	NA	NA	NA	NA	NA	NA	NA	NA	NA	NA	NA	NA	NA	NA	NA	-0.052241	0.052386	-0.000144	NA	NA	NA	NA	NA	NA	-0.028121	0.037869	-0.009747	NA	NA	NA
206061_s_at	DICER1	0.0952381	-0.333333	0.214286	0.0952381	-0.333333	0.214286	-0.219441	-0.303827	0.523268	NA	NA	NA	NA	NA	NA	NA	NA	NA	0.139719	-0.579373	0.439653	NA	NA	NA	NA	NA	NA	-0.161731	-0.328853	0.490584	NA	NA	NA	-0.102667	-0.165677	0.268344	NA	NA	NA	-0.111036	-0.149802	0.260838	NA	NA	NA
206532_at	SMARCB1	0.0238095	0.444444	0.142857	0.0238095	0.444444	0.142857	NA	NA	NA	-0.035032	0.045007	-0.009975	-0.014959	0.022646	-0.007687	NA	NA	NA	NA	NA	NA	NA	NA	NA	-0.032331	0.028653	0.003679	-0.001751	0.002128	-0.000377	-0.005646	0.007769	-0.002122	NA	NA	NA	NA	NA	NA	NA	NA	NA	NA	NA	NA
206627_s_at	SSX1	0.0238095	0.222222	0	0.0238095	0.222222	0	NA	NA	NA	-0.001454	0.003432	-0.001978	NA	NA	NA	-0.002019	0.005465	-0.003446	NA	NA	NA	NA	NA	NA	0.001435	0.048916	-0.050351	0.020843	0.027648	-0.048491	NA	NA	NA	NA	NA	NA	-0.020899	0.04921	-0.028311	NA	NA	NA	NA	NA	NA
207187_at	JAK3	0.0238095	0.555556	0.0714286	0.0238095	0.555556	0.0714286	-0.160068	0.314202	-0.154133	-0.072862	0.0663	0.006561	-0.128177	0.148437	-0.020259	NA	NA	NA	NA	NA	NA	NA	NA	NA	NA	NA	NA	NA	NA	NA	NA	NA	NA	NA	NA	NA	-0.045115	0.035788	0.009327	-0.047149	0.074235	-0.027086	NA	NA	NA
207569_at	ROS1	0.0238095	0.333333	0	0.0238095	0.333333	0	NA	NA	NA	NA	NA	NA	NA	NA	NA	-0.002838	0.011014	-0.008175	-0.00017	0.000339	-0.00017	0.006804	0.032524	-0.039328	-0.005505	0.021308	-0.015803	NA	NA	NA	0.001211	0.005528	-0.006739	NA	NA	NA	NA	NA	NA	NA	NA	NA	NA	NA	NA
208201_at	DUX2	0	0.222222	0	0	0.222222	0	NA	NA	NA	-0.004665	0.009854	-0.005189	NA	NA	NA	-0.001757	0.003728	-0.001971	NA	NA	NA	NA	NA	NA	-0.004061	0.018306	-0.014245	NA	NA	NA	NA	NA	NA	0.002241	0.002488	-0.004729	NA	NA	NA	NA	NA	NA	0.004844	0.013416	-0.01826
208211_s_at	ALK	0.0238095	0.333333	0.0714286	0.0238095	0.333333	0.0714286	NA	NA	NA	-0.065507	0.105892	-0.040385	-0.004516	0.005047	-0.00053	NA	NA	NA	NA	NA	NA	NA	NA	NA	NA	NA	NA	-0.008731	0.009146	-0.000416	NA	NA	NA	-0.025699	0.017357	0.008342	-0.036335	0.04652	-0.010185	NA	NA	NA	NA	NA	NA
208225_at	FGFR2	0.047619	0.222222	0	0.047619	0.222222	0	-0.029522	0.059045	-0.029522	NA	NA	NA	NA	NA	NA	NA	NA	NA	NA	NA	NA	NA	NA	NA	-0.003081	0.024504	-0.021423	0.000342	0.006377	-0.006718	NA	NA	NA	-0.00169	0.005239	-0.003549	NA	NA	NA	NA	NA	NA	-0.011469	0.024315	-0.012846
208228_s_at	FGFR2	0.142857	-0.333333	0.142857	0.142857	-0.333333	0.142857	0.091572	-0.277922	0.18635	NA	NA	NA	NA	NA	NA	NA	NA	NA	0.010822	-0.258271	0.247449	NA	NA	NA	NA	NA	NA	NA	NA	NA	NA	NA	NA	-0.204995	-0.231053	0.436048	-0.008592	-0.440623	0.449215	-0.060087	-0.244235	0.304321	NA	NA	NA
208442_s_at	ATM	0.238095	-0.333333	0.214286	0.238095	-0.333333	0.214286	NA	NA	NA	NA	NA	NA	0.143941	-0.105435	-0.038506	0.076631	-0.130138	0.053507	NA	NA	NA	0.054918	-0.066014	0.011095	NA	NA	NA	NA	NA	NA	0.058703	-0.042697	-0.016006	NA	NA	NA	NA	NA	NA	0.215189	-0.324457	0.109269	NA	NA	NA
208495_at	TLX3	0.0238095	0.111111	0	0.0238095	0.111111	0	-0.004371	0.008993	-0.004621	-0.020009	0.040543	-0.020534	NA	NA	NA	NA	NA	NA	NA	NA	NA	-0.012762	0.025524	-0.012762	-0.001022	0.015515	-0.014493	NA	NA	NA	NA	NA	NA	-0.014899	0.044944	-0.030045	NA	NA	NA	NA	NA	NA	NA	NA	NA
208712_at	CCND1	0.52381	0.333333	-0.928571	0.52381	0.333333	-0.928571	NA	NA	NA	NA	NA	NA	NA	NA	NA	NA	NA	NA	NA	NA	NA	0.068943	0.027044	-0.095987	NA	NA	NA	0.434815	-0.215854	-0.218961	0.485721	-0.045507	-0.440214	NA	NA	NA	1.16547	0.061314	-1.22679	0.46525	-0.217361	-0.247889	NA	NA	NA
209905_at	HOXA10	-0.214286	0	0.5	-0.214286	0	0.5	NA	NA	NA	NA	NA	NA	NA	NA	NA	NA	NA	NA	-0.521693	0.132418	0.389275	-0.20559	0.011252	0.194337	NA	NA	NA	-0.118674	0.053574	0.065101	NA	NA	NA	-0.206606	0.027172	0.179434	NA	NA	NA	-0.204152	0.046628	0.157524	NA	NA	NA
209997_x_at	PCM1	-0.5	0.555556	-0.357143	-0.5	0.555556	-0.357143	NA	NA	NA	NA	NA	NA	-0.021501	0.013753	0.007748	-0.05053	0.083207	-0.032677	NA	NA	NA	NA	NA	NA	-0.268769	0.191639	0.07713	NA	NA	NA	NA	NA	NA	-0.02287	0.023323	-0.000453	NA	NA	NA	-0.011078	0.015341	-0.004263	NA	NA	NA
210055_at	TSHR	-0.5	-0.444444	-0.785714	-0.5	-0.444444	-0.785714	-0.009481	0.020832	-0.011352	NA	NA	NA	-0.006871	0.021404	-0.014533	NA	NA	NA	-0.002172	0.004344	-0.002172	NA	NA	NA	NA	NA	NA	NA	NA	NA	NA	NA	NA	-0.036374	0.085205	-0.048831	NA	NA	NA	0.001901	0.013045	-0.014946	NA	NA	NA
210158_at	ERCC4	-0.595238	0.444444	-0.5	-0.595238	0.444444	-0.5	NA	NA	NA	-0.011638	0.011723	-8.5e-05	-0.011188	0.011398	-0.00021	-0.017303	0.011953	0.00535	-0.001131	0.00177	-0.000639	NA	NA	NA	NA	NA	NA	NA	NA	NA	-0.019096	0.031028	-0.011932	NA	NA	NA	NA	NA	NA	NA	NA	NA	NA	NA	NA
210498_at	CLTC	0.047619	0.222222	0.0714286	0.047619	0.222222	0.0714286	-0.015453	0.02952	-0.014067	NA	NA	NA	-0.023369	0.028003	-0.004634	NA	NA	NA	NA	NA	NA	NA	NA	NA	NA	NA	NA	NA	NA	NA	NA	NA	NA	-0.012546	0.018413	-0.005867	NA	NA	NA	-0.008631	0.007668	0.000964	-0.034728	0.040248	-0.00552
210741_at	ARHGEF12	0	0.444444	0	0	0.444444	0	-0.031811	0.063622	-0.031811	-0.000303	0.001131	-0.000828	NA	NA	NA	NA	NA	NA	NA	NA	NA	NA	NA	NA	-0.001306	0.017029	-0.015724	NA	NA	NA	NA	NA	NA	0.004716	0.009946	-0.014663	NA	NA	NA	-0.000632	0.001264	-0.000632	NA	NA	NA
210767_at	NF2	-0.0714286	0.222222	0.0714286	-0.0714286	0.222222	0.0714286	NA	NA	NA	-0.068521	0.109625	-0.041104	-0.051921	0.052765	-0.000845	NA	NA	NA	NA	NA	NA	NA	NA	NA	NA	NA	NA	NA	NA	NA	NA	NA	NA	-0.045173	0.066082	-0.020909	-0.04479	0.040597	0.004193	-0.043999	0.056323	-0.012324	NA	NA	NA
211000_s_at	IL6ST	0.333333	-0.888889	0.0714286	0.333333	-0.888889	0.0714286	NA	NA	NA	0.364722	-0.348603	-0.016119	0.093427	-0.098974	0.005547	0.527713	-0.34849	-0.179223	NA	NA	NA	0.131995	-0.079676	-0.052319	NA	NA	NA	NA	NA	NA	0.613148	-0.53693	-0.076218	NA	NA	NA	NA	NA	NA	NA	NA	NA	NA	NA	NA
211180_x_at	RUNX1	0.0714286	0.555556	0.142857	0.0714286	0.555556	0.142857	-0.021311	0.041609	-0.020298	NA	NA	NA	NA	NA	NA	NA	NA	NA	-0.103784	0.135083	-0.031298	NA	NA	NA	NA	NA	NA	-0.055785	0.111562	-0.055777	NA	NA	NA	NA	NA	NA	-0.151342	0.286812	-0.13547	-0.015852	0.023258	-0.007407	NA	NA	NA
211182_x_at	RUNX1	0.0238095	0.333333	0	0.0238095	0.333333	0	-0.00257	0.009665	-0.007095	NA	NA	NA	NA	NA	NA	NA	NA	NA	NA	NA	NA	0.004096	0.016462	-0.020559	NA	NA	NA	NA	NA	NA	NA	NA	NA	0.00362	0.005406	-0.009026	-0.009549	0.028499	-0.01895	NA	NA	NA	0.005481	0.02102	-0.026501
211261_at	NUP214	-0.0238095	0.333333	0	-0.0238095	0.333333	0	-0.143132	0.275839	-0.132707	NA	NA	NA	-0.06726	0.119184	-0.051924	-0.034155	0.056679	-0.022524	NA	NA	NA	NA	NA	NA	NA	NA	NA	NA	NA	NA	-0.07203	0.052765	0.019265	NA	NA	NA	NA	NA	NA	-0.061844	0.098081	-0.036237	NA	NA	NA
211398_at	FGFR2	0	0.444444	0	0	0.444444	0	-0.053131	0.108081	-0.05495	NA	NA	NA	NA	NA	NA	NA	NA	NA	-0.000661	0.001321	-0.000661	NA	NA	NA	-0.026713	0.065562	-0.038849	NA	NA	NA	NA	NA	NA	-0.059216	0.145723	-0.086507	NA	NA	NA	NA	NA	NA	-0.007936	0.021871	-0.013935
211605_s_at	RARA	-0.047619	0.666667	-0.285714	-0.047619	0.666667	-0.285714	NA	NA	NA	NA	NA	NA	NA	NA	NA	-0.006458	0.03314	-0.026682	NA	NA	NA	NA	NA	NA	-0.014343	0.076797	-0.062453	-0.015439	0.079841	-0.064402	-0.009139	0.02298	-0.013841	-0.040733	0.092589	-0.051856	NA	NA	NA	NA	NA	NA	NA	NA	NA
211620_x_at	RUNX1	0.0714286	0.333333	0	0.0714286	0.333333	0	1.7e-05	0.002394	-0.002412	NA	NA	NA	NA	NA	NA	NA	NA	NA	NA	NA	NA	-0.000617	0.001605	-0.000988	NA	NA	NA	-0.003045	0.009085	-0.00604	NA	NA	NA	-0.006495	0.016318	-0.009823	NA	NA	NA	-9e-06	1.8e-05	-9e-06	NA	NA	NA
212118_at	TRIM27	-0.0952381	-0.444444	0.428571	-0.0952381	-0.444444	0.428571	0.057795	-0.265381	0.207586	NA	NA	NA	NA	NA	NA	NA	NA	NA	NA	NA	NA	-0.049561	-0.06145	0.111011	-0.046188	-0.529097	0.575285	0.024411	-0.224204	0.199792	NA	NA	NA	NA	NA	NA	NA	NA	NA	-0.116555	-0.122323	0.238878	NA	NA	NA
212148_at	PBX1	0.190476	-0.444444	0.214286	0.190476	-0.444444	0.214286	NA	NA	NA	NA	NA	NA	NA	NA	NA	NA	NA	NA	NA	NA	NA	NA	NA	NA	NA	NA	NA	-0.043122	-0.394742	0.437864	NA	NA	NA	-0.008385	-0.309824	0.318209	-0.01448	-0.545569	0.560049	0.023576	-0.104118	0.080542	0.101251	-0.239418	0.138167
212493_s_at	SETD2	-0.190476	0.111111	0.571429	-0.190476	0.111111	0.571429	NA	NA	NA	NA	NA	NA	NA	NA	NA	-0.095269	-0.025446	0.120715	NA	NA	NA	-0.052723	0.003786	0.048937	NA	NA	NA	-0.13136	-0.072547	0.203906	-0.107966	-0.039613	0.147579	NA	NA	NA	NA	NA	NA	NA	NA	NA	-0.274772	-0.084485	0.359257
213807_x_at	MET	0.0238095	-0.888889	0.214286	0.0238095	-0.888889	0.214286	NA	NA	NA	NA	NA	NA	-0.019932	-0.033441	0.053373	0.172025	-0.663569	0.491544	-0.84656	-0.924583	1.77114	0.024937	-0.271979	0.247042	NA	NA	NA	0.120213	-0.475471	0.355259	NA	NA	NA	NA	NA	NA	NA	NA	NA	NA	NA	NA	NA	NA	NA
213917_at	PAX8	-0.428571	1	0.428571	-0.428571	1	0.428571	NA	NA	NA	NA	NA	NA	-0.026601	0.047441	-0.02084	NA	NA	NA	-0.002714	0.002488	0.000226	NA	NA	NA	NA	NA	NA	NA	NA	NA	-0.070138	0.055536	0.014602	-0.717676	0.761964	-0.044288	NA	NA	NA	NA	NA	NA	-0.067689	0.043072	0.024616
213971_s_at	SUZ12P1	-0.404762	1	0.0714286	-0.404762	1	0.0714286	NA	NA	NA	-0.199338	0.155579	0.043759	-0.176729	0.126993	0.049736	NA	NA	NA	-0.872426	0.442554	0.429872	-0.240405	0.192407	0.047998	NA	NA	NA	NA	NA	NA	NA	NA	NA	NA	NA	NA	NA	NA	NA	-0.279738	0.270326	0.009412	NA	NA	NA
214129_at	PDE4DIP	0.142857	-0.555556	0.142857	0.142857	-0.555556	0.142857	NA	NA	NA	-0.06225	-0.3038	0.36605	NA	NA	NA	NA	NA	NA	NA	NA	NA	NA	NA	NA	0.037829	-0.270799	0.23297	0.141276	-0.371472	0.230196	NA	NA	NA	0.037052	-0.324186	0.287134	NA	NA	NA	-0.008628	-0.058214	0.066842	NA	NA	NA
214157_at	GNAS	-0.571429	-0.444444	-0.214286	-0.571429	-0.444444	-0.214286	NA	NA	NA	NA	NA	NA	-0.213484	-0.161707	0.375191	-0.241614	-0.094364	0.335978	NA	NA	NA	-0.0194	-0.016061	0.035462	NA	NA	NA	NA	NA	NA	NA	NA	NA	-0.212862	-0.199944	0.412805	-0.407798	0.13244	0.275358	NA	NA	NA	NA	NA	NA
214250_at	NUMA1	-0.285714	1	-0.0714286	-0.285714	1	-0.0714286	NA	NA	NA	NA	NA	NA	-0.218366	0.357686	-0.13932	-0.175363	0.291222	-0.115859	NA	NA	NA	NA	NA	NA	-0.284668	0.31591	-0.031243	NA	NA	NA	NA	NA	NA	NA	NA	NA	NA	NA	NA	-0.196333	0.257391	-0.061058	-0.18501	0.174806	0.010204
214431_at	GMPS	0.047619	-0.444444	0.642857	0.047619	-0.444444	0.642857	NA	NA	NA	0.022953	-0.062012	0.039059	-0.100892	-0.236104	0.336996	NA	NA	NA	NA	NA	NA	NA	NA	NA	0.020781	-0.32588	0.305099	-0.228528	-0.60971	0.838239	NA	NA	NA	-0.095548	-0.250525	0.346073	NA	NA	NA	NA	NA	NA	NA	NA	NA
215260_s_at	TCF3	-0.309524	0.888889	-0.0714286	-0.309524	0.888889	-0.0714286	NA	NA	NA	NA	NA	NA	-0.064889	0.102247	-0.037358	-0.099992	0.102945	-0.002954	-0.140424	0.136261	0.004163	-0.101906	0.107731	-0.005825	NA	NA	NA	NA	NA	NA	NA	NA	NA	NA	NA	NA	-0.129552	0.118471	0.01108	NA	NA	NA	NA	NA	NA
215291_at	MKL1	0.0714286	0.555556	0.142857	0.0714286	0.555556	0.142857	-0.070157	0.053691	0.016466	NA	NA	NA	-0.011328	0.018345	-0.007018	-0.012674	0.015531	-0.002858	-0.026632	0.025755	0.000877	NA	NA	NA	NA	NA	NA	NA	NA	NA	NA	NA	NA	NA	NA	NA	NA	NA	NA	-0.021137	0.014258	0.006879	NA	NA	NA
215530_at	FANCA	0.0238095	0.333333	0.0714286	0.0238095	0.333333	0.0714286	-0.047187	0.084054	-0.036867	NA	NA	NA	-0.066367	0.05307	0.013298	NA	NA	NA	NA	NA	NA	NA	NA	NA	NA	NA	NA	NA	NA	NA	NA	NA	NA	NA	NA	NA	-0.035489	0.033815	0.001674	-0.030246	0.055218	-0.024972	-0.041127	0.05017	-0.009043
215550_at	SRGAP3	0	0.333333	0	0	0.333333	0	NA	NA	NA	NA	NA	NA	NA	NA	NA	NA	NA	NA	NA	NA	NA	NA	NA	NA	0.001649	0.007844	-0.009493	-0.002967	0.010813	-0.007846	-0.002472	0.009963	-0.007491	NA	NA	NA	NA	NA	NA	-0.000552	0.00307	-0.002518	-0.000188	0.004288	-0.004099
215611_at	TCF12	-0.309524	0.888889	-0.357143	-0.309524	0.888889	-0.357143	NA	NA	NA	NA	NA	NA	-0.02908	0.09469	-0.06561	-0.126577	0.260484	-0.133906	NA	NA	NA	-0.004505	0.009009	-0.004505	NA	NA	NA	-0.018103	0.082549	-0.064446	NA	NA	NA	NA	NA	NA	0.127636	0.22314	-0.350776	NA	NA	NA	NA	NA	NA
215744_at	FUS	0.0952381	0.555556	0.142857	0.0952381	0.555556	0.142857	NA	NA	NA	-0.059909	0.096106	-0.036198	-0.018737	0.030665	-0.011928	-0.083819	0.057199	0.026619	NA	NA	NA	-0.01629	0.032312	-0.016022	NA	NA	NA	NA	NA	NA	NA	NA	NA	NA	NA	NA	NA	NA	NA	-0.045504	0.047761	-0.002258	NA	NA	NA
215885_at	SSX3	0.0238095	0.333333	0	0.0238095	0.333333	0	NA	NA	NA	-0.00021	0.000944	-0.000734	NA	NA	NA	-0.000129	0.000539	-0.00041	NA	NA	NA	NA	NA	NA	0.001457	0.005797	-0.007254	-0.004515	0.013338	-0.008823	NA	NA	NA	-0.006627	0.020727	-0.0141	NA	NA	NA	NA	NA	NA	NA	NA	NA
216059_at	PAX3	0	0.222222	0	0	0.222222	0	NA	NA	NA	NA	NA	NA	NA	NA	NA	NA	NA	NA	NA	NA	NA	-0.005606	0.011247	-0.005641	-0.000224	0.009479	-0.009255	0.001023	0.003108	-0.004132	-0.001934	0.005337	-0.003403	NA	NA	NA	NA	NA	NA	0.015678	0.02785	-0.043529	NA	NA	NA
216987_at	IRF4	0	0.111111	0	0	0.111111	0	NA	NA	NA	-0.00021	0.000944	-0.000734	NA	NA	NA	NA	NA	NA	-0.00048	0.00096	-0.00048	NA	NA	NA	0.002385	0.005873	-0.008258	-0.000503	0.005334	-0.00483	NA	NA	NA	-0.011669	0.032894	-0.021226	NA	NA	NA	NA	NA	NA	NA	NA	NA
217168_s_at	HERPUD1	0.309524	-0.888889	-0.0714286	0.309524	-0.888889	-0.0714286	NA	NA	NA	NA	NA	NA	0.258382	-0.173433	-0.084949	NA	NA	NA	NA	NA	NA	NA	NA	NA	NA	NA	NA	0.43323	-0.362399	-0.070831	0.097746	-0.100865	0.003119	0.493664	-0.523519	0.029855	0.284736	-0.185597	-0.099138	NA	NA	NA	NA	NA	NA
217370_x_at	FUS	0.047619	-0.222222	0.214286	0.047619	-0.222222	0.214286	NA	NA	NA	NA	NA	NA	0.026441	-0.151436	0.124995	0.059871	-0.340156	0.280285	NA	NA	NA	NA	NA	NA	NA	NA	NA	-0.046312	-0.488939	0.535251	NA	NA	NA	-0.047312	-0.307788	0.3551	NA	NA	NA	0.182358	-0.453164	0.270806	NA	NA	NA
218559_s_at	MAFB	0.190476	-0.555556	0	0.190476	-0.555556	0	NA	NA	NA	NA	NA	NA	NA	NA	NA	NA	NA	NA	NA	NA	NA	0.439814	-0.288138	-0.151676	NA	NA	NA	0.514665	-0.377931	-0.136734	NA	NA	NA	0.701743	-0.565183	-0.13656	NA	NA	NA	0.567114	-0.406598	-0.160516	0.231534	-0.382167	0.150634
218642_s_at	CHCHD7	-0.119048	-0.444444	0.285714	-0.119048	-0.444444	0.285714	NA	NA	NA	NA	NA	NA	0.034474	-0.131002	0.096528	NA	NA	NA	0.271829	-0.674863	0.403034	-0.036829	-0.116673	0.153503	NA	NA	NA	-0.06813	-0.233681	0.301811	NA	NA	NA	-0.136	-0.218186	0.354186	NA	NA	NA	NA	NA	NA	NA	NA	NA
218908_at	ASPSCR1	-0.166667	0.222222	0.571429	-0.166667	0.222222	0.571429	NA	NA	NA	NA	NA	NA	-0.086697	-0.062376	0.149073	NA	NA	NA	NA	NA	NA	NA	NA	NA	-0.140976	-0.123706	0.264683	NA	NA	NA	NA	NA	NA	-0.293851	-0.029601	0.323452	-0.239121	-0.232353	0.471473	NA	NA	NA	-0.30455	-0.136501	0.441051
219084_at	NSD1	-0.0952381	0.555556	-0.214286	-0.0952381	0.555556	-0.214286	NA	NA	NA	0.010158	0.094427	-0.104585	-0.008959	0.036469	-0.027511	NA	NA	NA	0.072232	0.108326	-0.180559	NA	NA	NA	-0.03346	0.074101	-0.040641	NA	NA	NA	NA	NA	NA	NA	NA	NA	0.095722	0.130662	-0.226384	NA	NA	NA	NA	NA	NA
219492_at	CHIC2	0.285714	-0.777778	0	0.285714	-0.777778	0	0.296916	-0.535491	0.238575	0.284991	-0.346556	0.061565	0.320178	-0.474673	0.154495	0.312256	-0.273131	-0.039126	NA	NA	NA	NA	NA	NA	NA	NA	NA	NA	NA	NA	NA	NA	NA	NA	NA	NA	NA	NA	NA	0.382783	-0.42215	0.039367	NA	NA	NA
219528_s_at	BCL11B	-0.380952	-0.666667	-0.714286	-0.380952	-0.666667	-0.714286	NA	NA	NA	NA	NA	NA	0.104527	0.022576	-0.127103	NA	NA	NA	0.270975	-0.120456	-0.150519	NA	NA	NA	0.222856	0.215923	-0.438779	NA	NA	NA	0.708756	-0.175092	-0.533665	NA	NA	NA	NA	NA	NA	0.027666	0.004858	-0.032524	NA	NA	NA
219839_x_at	TCL6	0.0714286	0.333333	0	0.0714286	0.333333	0	NA	NA	NA	NA	NA	NA	NA	NA	NA	NA	NA	NA	NA	NA	NA	NA	NA	NA	-0.012977	0.044111	-0.031134	-0.007666	0.016911	-0.009245	NA	NA	NA	-0.018064	0.048271	-0.030207	NA	NA	NA	-0.004131	0.008261	-0.004131	-0.01816	0.046214	-0.028054
219971_at	IL21R	0.0952381	0.555556	0.0714286	0.0952381	0.555556	0.0714286	NA	NA	NA	NA	NA	NA	0.006618	0.013978	-0.020596	NA	NA	NA	-0.369225	0.776502	-0.407277	0.001685	0.01083	-0.012515	NA	NA	NA	NA	NA	NA	NA	NA	NA	NA	NA	NA	0.001611	0.112654	-0.114265	NA	NA	NA	0.014638	0.01878	-0.033417
221206_at	PMS2	-0.333333	0.444444	0.142857	-0.333333	0.444444	0.142857	NA	NA	NA	-0.239087	0.176828	0.06226	NA	NA	NA	-0.160199	0.130874	0.029325	NA	NA	NA	-0.079561	0.158372	-0.078811	NA	NA	NA	NA	NA	NA	-0.254313	0.129616	0.124697	NA	NA	NA	NA	NA	NA	-0.068166	0.089142	-0.020976	NA	NA	NA
221969_at	PAX5	0.142857	0.222222	0	0.142857	0.222222	0	NA	NA	NA	NA	NA	NA	0.009178	0.1645	-0.173679	NA	NA	NA	NA	NA	NA	NA	NA	NA	NA	NA	NA	-0.087458	0.325783	-0.238324	NA	NA	NA	0.019824	0.236755	-0.25658	-0.160267	0.352217	-0.191951	NA	NA	NA	0.000752	0.127815	-0.128567
221990_at	PAX8	-0.595238	0.555556	0.357143	-0.595238	0.555556	0.357143	-0.049606	0.041716	0.00789	-0.032456	0.054533	-0.022077	-0.012225	0.017666	-0.005441	NA	NA	NA	NA	NA	NA	NA	NA	NA	NA	NA	NA	-0.019376	0.031863	-0.012487	-0.014808	0.028287	-0.013479	NA	NA	NA	NA	NA	NA	NA	NA	NA	NA	NA	NA
222018_at	NACA	-0.238095	0.333333	0.214286	-0.238095	0.333333	0.214286	NA	NA	NA	-0.138898	0.158757	-0.019859	-0.082995	0.152571	-0.069576	-0.267825	0.388713	-0.120888	NA	NA	NA	NA	NA	NA	NA	NA	NA	NA	NA	NA	-0.123841	0.233964	-0.110122	NA	NA	NA	NA	NA	NA	-0.139825	0.102556	0.037269	NA	NA	NA
200735_x_at	NACA	0.52381	-0.888889	0.285714	0.52381	-0.888889	0.285714	NA	NA	NA	NA	NA	NA	0.124103	-0.153331	0.029227	NA	NA	NA	0.099261	-0.179243	0.079982	NA	NA	NA	NA	NA	NA	NA	NA	NA	NA	NA	NA	NA	NA	NA	0.271705	-0.179559	-0.092146	0.077864	-0.062062	-0.015802	NA	NA	NA
200747_s_at	NUMA1	-0.119048	0.888889	-0.5	-0.119048	0.888889	-0.5	NA	NA	NA	NA	NA	NA	-0.076129	0.202056	-0.125927	-0.05409	0.133561	-0.07947	NA	NA	NA	-0.007453	0.101392	-0.093939	NA	NA	NA	NA	NA	NA	NA	NA	NA	NA	NA	NA	0.010552	0.192255	-0.202807	NA	NA	NA	NA	NA	NA
200780_x_at	GNAS	-0.214286	0.555556	0.214286	-0.214286	0.555556	0.214286	NA	NA	NA	-0.053337	0.067812	-0.014474	NA	NA	NA	NA	NA	NA	NA	NA	NA	-0.057244	0.086904	-0.02966	NA	NA	NA	NA	NA	NA	NA	NA	NA	NA	NA	NA	-0.114432	0.156941	-0.042509	NA	NA	NA	-0.050301	0.035527	0.014773
200981_x_at	GNAS	-0.214286	0.777778	0.214286	-0.214286	0.777778	0.214286	NA	NA	NA	-0.069353	0.098718	-0.029366	NA	NA	NA	NA	NA	NA	NA	NA	NA	-0.03972	0.067469	-0.027749	NA	NA	NA	NA	NA	NA	NA	NA	NA	NA	NA	NA	-0.10618	0.174206	-0.068026	NA	NA	NA	-0.04731	0.046001	0.001309
201333_s_at	ARHGEF12	-0.333333	0.888889	0.0714286	-0.333333	0.888889	0.0714286	-0.030829	0.036964	-0.006135	NA	NA	NA	-0.040145	0.050807	-0.010662	NA	NA	NA	-0.420093	0.219141	0.200952	-0.059673	0.083314	-0.023641	NA	NA	NA	NA	NA	NA	NA	NA	NA	NA	NA	NA	NA	NA	NA	NA	NA	NA	NA	NA	NA
201334_s_at	ARHGEF12	0.285714	-0.666667	-0.214286	0.285714	-0.666667	-0.214286	NA	NA	NA	NA	NA	NA	0.224821	-0.20554	-0.019281	NA	NA	NA	0.525127	-0.339708	-0.185419	NA	NA	NA	NA	NA	NA	NA	NA	NA	NA	NA	NA	NA	NA	NA	0.107489	-0.083151	-0.024338	0.176672	-0.126881	-0.049791	NA	NA	NA
201533_at	CTNNB1	0.238095	-0.888889	0.285714	0.238095	-0.888889	0.285714	NA	NA	NA	NA	NA	NA	NA	NA	NA	NA	NA	NA	-0.067626	-0.319498	0.387124	NA	NA	NA	NA	NA	NA	0.094002	-0.365118	0.271116	-0.043309	-0.070396	0.113706	0.182433	-0.402575	0.220142	NA	NA	NA	NA	NA	NA	NA	NA	NA
202040_s_at	KDM5A	-0.357143	1	0.0714286	-0.357143	1	0.0714286	NA	NA	NA	NA	NA	NA	NA	NA	NA	NA	NA	NA	NA	NA	NA	-0.205284	0.217412	-0.012128	-0.101382	0.128921	-0.027539	NA	NA	NA	-0.040819	0.047537	-0.006718	NA	NA	NA	NA	NA	NA	-0.308204	0.281917	0.026287	NA	NA	NA
202155_s_at	NUP214	-0.142857	0.555556	-0.357143	-0.142857	0.555556	-0.357143	0.016684	0.018465	-0.035149	NA	NA	NA	-0.020436	0.120531	-0.100094	NA	NA	NA	0.063004	0.122744	-0.185748	NA	NA	NA	NA	NA	NA	NA	NA	NA	-0.008569	0.05695	-0.048381	NA	NA	NA	NA	NA	NA	NA	NA	NA	NA	NA	NA
202647_s_at	NRAS	0.238095	-0.777778	0.214286	0.238095	-0.777778	0.214286	NA	NA	NA	0.276997	-0.405575	0.128578	NA	NA	NA	NA	NA	NA	NA	NA	NA	0.224291	-0.444889	0.220598	NA	NA	NA	NA	NA	NA	NA	NA	NA	NA	NA	NA	0.29751	-0.327024	0.029514	0.287898	-0.332452	0.044554	NA	NA	NA
202821_s_at	LPP	-0.261905	0.777778	-0.0714286	-0.261905	0.777778	-0.0714286	NA	NA	NA	NA	NA	NA	-0.10472	0.198186	-0.093466	NA	NA	NA	-0.621415	0.468282	0.153132	-0.043191	0.040921	0.00227	-0.103143	0.144447	-0.041304	NA	NA	NA	NA	NA	NA	NA	NA	NA	NA	NA	NA	NA	NA	NA	NA	NA	NA
202861_at	PER1	-0.119048	0.555556	-0.642857	-0.119048	0.555556	-0.642857	-0.074068	0.247925	-0.173857	NA	NA	NA	NA	NA	NA	NA	NA	NA	NA	NA	NA	-0.004014	0.064652	-0.060638	NA	NA	NA	NA	NA	NA	0.046927	0.12913	-0.176056	NA	NA	NA	NA	NA	NA	NA	NA	NA	0.251202	0.38779	-0.638993
203118_at	PCSK7	-0.404762	0.777778	0.214286	-0.404762	0.777778	0.214286	NA	NA	NA	NA	NA	NA	NA	NA	NA	-0.119241	0.100191	0.01905	NA	NA	NA	NA	NA	NA	-0.0988	0.06443	0.03437	NA	NA	NA	-0.098364	0.184823	-0.086459	-0.076416	0.042715	0.033701	NA	NA	NA	NA	NA	NA	NA	NA	NA
203134_at	PICALM	0.0714286	-0.333333	0.142857	0.0714286	-0.333333	0.142857	NA	NA	NA	NA	NA	NA	0.03007	-0.071706	0.041637	NA	NA	NA	NA	NA	NA	0.032966	-0.070956	0.03799	NA	NA	NA	0.087443	-0.361264	0.273821	NA	NA	NA	NA	NA	NA	0.094338	-0.269631	0.175292	NA	NA	NA	NA	NA	NA
203349_s_at	ETV5	-0.238095	0	0.571429	-0.238095	0	0.571429	NA	NA	NA	NA	NA	NA	NA	NA	NA	NA	NA	NA	NA	NA	NA	-0.054637	0.023863	0.030774	-0.136475	0.014002	0.122473	NA	NA	NA	NA	NA	NA	NA	NA	NA	NA	NA	NA	-0.210207	-0.045967	0.256174	-0.109572	-0.109219	0.218791
203510_at	MET	0.0238095	-0.666667	0.571429	0.0238095	-0.666667	0.571429	0.312776	-0.811489	0.498713	NA	NA	NA	NA	NA	NA	NA	NA	NA	-0.442005	-1.01965	1.46165	-0.034345	-0.323017	0.357363	NA	NA	NA	0.238266	-0.490371	0.252105	NA	NA	NA	NA	NA	NA	NA	NA	NA	NA	NA	NA	NA	NA	NA
203527_s_at	APC	-0.428571	0.111111	-0.357143	-0.428571	0.111111	-0.357143	NA	NA	NA	-0.409128	0.254539	0.154589	-0.053189	0.045108	0.008081	-0.033215	0.045335	-0.01212	NA	NA	NA	-0.019087	0.014296	0.004791	NA	NA	NA	NA	NA	NA	NA	NA	NA	NA	NA	NA	NA	NA	NA	NA	NA	NA	NA	NA	NA
204753_s_at	HLF	0.333333	-0.888889	-0.0714286	0.333333	-0.888889	-0.0714286	NA	NA	NA	NA	NA	NA	NA	NA	NA	NA	NA	NA	NA	NA	NA	NA	NA	NA	0.102556	-0.106663	0.004107	0.278412	-0.199294	-0.079118	NA	NA	NA	NA	NA	NA	0.544097	-0.636528	0.092431	NA	NA	NA	0.438093	-0.317734	-0.120359
204755_x_at	HLF	0.214286	-0.777778	-0.0714286	0.214286	-0.777778	-0.0714286	NA	NA	NA	NA	NA	NA	NA	NA	NA	NA	NA	NA	NA	NA	NA	NA	NA	NA	0.049205	-0.032439	-0.016766	0.214038	-0.113477	-0.100561	NA	NA	NA	NA	NA	NA	0.529403	-0.520426	-0.008977	NA	NA	NA	0.400397	-0.226131	-0.174265
205372_at	PLAG1	-0.880952	0.333333	0	-0.880952	0.333333	0	NA	NA	NA	NA	NA	NA	-0.094333	0.120542	-0.026209	-0.100202	0.07186	0.028342	NA	NA	NA	-0.321845	0.229549	0.092295	NA	NA	NA	NA	NA	NA	NA	NA	NA	-0.335385	0.174338	0.161047	NA	NA	NA	NA	NA	NA	NA	NA	NA
205655_at	MDM4	0.0238095	0.333333	0.214286	0.0238095	0.333333	0.214286	NA	NA	NA	-0.177207	0.104428	0.072779	-0.037127	0.022881	0.014246	NA	NA	NA	NA	NA	NA	-0.007137	0.00635	0.000787	-0.108157	0.055298	0.052859	NA	NA	NA	NA	NA	NA	NA	NA	NA	NA	NA	NA	NA	NA	NA	NA	NA	NA
205731_s_at	NCOA2	-0.380952	0.444444	0.214286	-0.380952	0.444444	0.214286	-0.034871	0.019644	0.015227	NA	NA	NA	NA	NA	NA	NA	NA	NA	-0.43802	0.615148	-0.177129	NA	NA	NA	NA	NA	NA	NA	NA	NA	NA	NA	NA	-0.064001	0.102718	-0.038717	NA	NA	NA	-0.180842	0.151911	0.02893	NA	NA	NA
205733_at	BLM	0.0714286	0.444444	0.214286	0.0714286	0.444444	0.214286	-0.18278	0.099681	0.083099	NA	NA	NA	NA	NA	NA	NA	NA	NA	-0.160875	0.152204	0.008671	-0.158721	0.176961	-0.01824	NA	NA	NA	NA	NA	NA	NA	NA	NA	NA	NA	NA	-0.168591	0.173444	-0.004853	NA	NA	NA	NA	NA	NA
205907_s_at	OMD	0.142857	0.222222	0.0714286	0.142857	0.222222	0.0714286	-0.030048	0.09235	-0.062302	NA	NA	NA	NA	NA	NA	NA	NA	NA	NA	NA	NA	NA	NA	NA	0.00077	0.008168	-0.008938	NA	NA	NA	NA	NA	NA	NA	NA	NA	-0.04629	0.394906	-0.348617	0.002817	0.023254	-0.026071	NA	NA	NA
205994_at	ELK4	0.0238095	0.333333	0	0.0238095	0.333333	0	-0.114812	0.232794	-0.117983	-0.025963	0.067755	-0.041792	NA	NA	NA	NA	NA	NA	NA	NA	NA	NA	NA	NA	-0.013054	0.107549	-0.094496	NA	NA	NA	NA	NA	NA	NA	NA	NA	-0.008319	0.018493	-0.010174	NA	NA	NA	NA	NA	NA
206035_at	REL	0	0.666667	0.0714286	0	0.666667	0.0714286	NA	NA	NA	NA	NA	NA	-0.046984	0.068201	-0.021217	NA	NA	NA	NA	NA	NA	NA	NA	NA	NA	NA	NA	NA	NA	NA	-0.034426	0.03511	-0.000684	-0.039576	0.068789	-0.029213	NA	NA	NA	-0.00705	0.011775	-0.004725	NA	NA	NA
206411_s_at	ABL2	0.0238095	0.444444	0	0.0238095	0.444444	0	NA	NA	NA	-0.001995	0.007862	-0.005867	NA	NA	NA	NA	NA	NA	NA	NA	NA	NA	NA	NA	0.012027	0.012472	-0.024498	NA	NA	NA	NA	NA	NA	-0.002919	0.0137	-0.010782	NA	NA	NA	-0.002115	0.005283	-0.003168	NA	NA	NA
206745_at	HOXC11	-0.142857	0.333333	0.285714	-0.142857	0.333333	0.285714	-0.263931	0.186857	0.077074	-0.032034	0.037006	-0.004972	-0.076171	0.048179	0.027993	NA	NA	NA	NA	NA	NA	NA	NA	NA	NA	NA	NA	NA	NA	NA	NA	NA	NA	-0.031344	0.056234	-0.02489	NA	NA	NA	NA	NA	NA	NA	NA	NA
207005_s_at	BCL2	0.0238095	0.222222	0.214286	0.0238095	0.222222	0.214286	-0.03236	0.022861	0.009499	NA	NA	NA	-0.042223	0.042153	7e-05	NA	NA	NA	NA	NA	NA	-0.00708	0.012367	-0.005287	-0.195433	0.117614	0.077819	NA	NA	NA	NA	NA	NA	NA	NA	NA	NA	NA	NA	NA	NA	NA	NA	NA	NA
207009_at	PHOX2B	0	0.222222	0	0	0.222222	0	NA	NA	NA	-0.001152	0.002828	-0.001676	NA	NA	NA	NA	NA	NA	NA	NA	NA	NA	NA	NA	-0.001181	0.010905	-0.009724	NA	NA	NA	NA	NA	NA	-0.008843	0.028514	-0.019671	NA	NA	NA	-0.001159	0.002319	-0.001159	NA	NA	NA
207143_at	CDK6	-0.642857	-0.333333	-0.0714286	-0.642857	-0.333333	-0.0714286	NA	NA	NA	NA	NA	NA	NA	NA	NA	-0.025535	-0.006519	0.032054	NA	NA	NA	NA	NA	NA	-0.287652	-0.129494	0.417146	NA	NA	NA	NA	NA	NA	-0.004611	0.000788	0.003823	-0.062218	0.020149	0.04207	NA	NA	NA	NA	NA	NA
207260_at	FEV	0.0238095	0.333333	0	0.0238095	0.333333	0	-0.101012	0.204684	-0.103672	NA	NA	NA	NA	NA	NA	-0.021326	0.054859	-0.033533	NA	NA	NA	4.6e-05	0.005674	-0.005719	NA	NA	NA	NA	NA	NA	NA	NA	NA	-0.035876	0.077708	-0.041831	NA	NA	NA	NA	NA	NA	NA	NA	NA
208076_at	HIST1H4D	0.0714286	0.333333	0.0714286	0.0714286	0.333333	0.0714286	-4.9e-05	0.000733	-0.000684	-0.000631	0.00295	-0.002318	NA	NA	NA	NA	NA	NA	-0.001876	0.003751	-0.001876	-0.006307	0.01319	-0.006883	NA	NA	NA	NA	NA	NA	NA	NA	NA	NA	NA	NA	NA	NA	NA	NA	NA	NA	NA	NA	NA
208493_at	HOXA11	0.0952381	0.222222	0.142857	0.0952381	0.222222	0.142857	NA	NA	NA	NA	NA	NA	-0.008003	0.011581	-0.003579	NA	NA	NA	NA	NA	NA	-0.010118	0.020109	-0.009991	-0.025503	0.030596	-0.005093	NA	NA	NA	-0.004292	0.006804	-0.002512	NA	NA	NA	NA	NA	NA	NA	NA	NA	NA	NA	NA
209105_at	NCOA1	0.333333	-0.888889	0	0.333333	-0.888889	0	NA	NA	NA	NA	NA	NA	0.319672	-0.2726	-0.047072	0.191907	-0.165645	-0.026261	0.091937	-0.088955	-0.002982	0.144904	-0.108282	-0.036622	NA	NA	NA	NA	NA	NA	NA	NA	NA	NA	NA	NA	NA	NA	NA	NA	NA	NA	NA	NA	NA
209107_x_at	NCOA1	0.142857	0.111111	-0.0714286	0.142857	0.111111	-0.0714286	NA	NA	NA	NA	NA	NA	0.182772	0.054745	-0.237517	0.084958	0.061949	-0.146907	NA	NA	NA	NA	NA	NA	NA	NA	NA	NA	NA	NA	0.415576	-0.017578	-0.397998	NA	NA	NA	NA	NA	NA	0.190995	0.123641	-0.314637	NA	NA	NA
209794_at	SRGAP3	0	0.111111	0.428571	0	0.111111	0.428571	NA	NA	NA	NA	NA	NA	NA	NA	NA	NA	NA	NA	-0.029499	-0.010824	0.040323	NA	NA	NA	NA	NA	NA	-0.065083	-0.020702	0.085784	NA	NA	NA	-0.129533	0.043287	0.086245	-0.307264	0.045661	0.261603	NA	NA	NA	NA	NA	NA
209996_x_at	PCM1	-0.5	0.777778	-0.214286	-0.5	0.777778	-0.214286	NA	NA	NA	NA	NA	NA	-0.04566	0.039756	0.005904	NA	NA	NA	NA	NA	NA	-0.024476	0.029611	-0.005135	-0.176651	0.149267	0.027384	NA	NA	NA	NA	NA	NA	NA	NA	NA	NA	NA	NA	-0.045327	0.083045	-0.037718	NA	NA	NA
210756_s_at	NOTCH2	0.238095	-1	0.571429	0.238095	-1	0.571429	NA	NA	NA	NA	NA	NA	NA	NA	NA	NA	NA	NA	NA	NA	NA	0.043542	-0.15396	0.110418	0.022521	-0.088314	0.065794	NA	NA	NA	NA	NA	NA	-0.011518	-0.292422	0.30394	NA	NA	NA	0.46245	-1.05324	0.590794	NA	NA	NA
210760_x_at	TRIP11	0.0238095	0.333333	0.142857	0.0238095	0.333333	0.142857	NA	NA	NA	NA	NA	NA	-0.009037	0.013953	-0.004916	NA	NA	NA	NA	NA	NA	-0.00871	0.005542	0.003168	NA	NA	NA	-0.022705	0.016865	0.00584	NA	NA	NA	NA	NA	NA	NA	NA	NA	NA	NA	NA	-0.014019	0.02137	-0.007351
210805_x_at	RUNX1	0.0238095	0.444444	0.0714286	0.0238095	0.444444	0.0714286	NA	NA	NA	NA	NA	NA	-0.013002	0.014557	-0.001555	NA	NA	NA	NA	NA	NA	NA	NA	NA	NA	NA	NA	-0.009362	0.016416	-0.007054	-0.008161	0.00483	0.003332	NA	NA	NA	-0.033387	0.053847	-0.02046	NA	NA	NA	NA	NA	NA
210858_x_at	ATM	0.0238095	-0.111111	0.142857	0.0238095	-0.111111	0.142857	NA	NA	NA	0.010836	-0.095332	0.084496	NA	NA	NA	NA	NA	NA	NA	NA	NA	NA	NA	NA	-0.082537	-0.10742	0.189957	-0.04456	-0.227382	0.271942	NA	NA	NA	NA	NA	NA	NA	NA	NA	NA	NA	NA	-0.107437	-0.126998	0.234436
210930_s_at	ERBB2	0.0714286	0	0.0714286	0.0714286	0	0.0714286	NA	NA	NA	NA	NA	NA	-0.015326	-0.098418	0.113744	NA	NA	NA	NA	NA	NA	-0.105832	-0.167969	0.273801	NA	NA	NA	0.046831	-0.118321	0.071491	NA	NA	NA	0.034759	-0.175098	0.140339	NA	NA	NA	NA	NA	NA	NA	NA	NA
211092_s_at	NF2	0.0238095	0.333333	0.142857	0.0238095	0.333333	0.142857	NA	NA	NA	NA	NA	NA	-0.029561	0.025167	0.004394	NA	NA	NA	-0.0209	0.041764	-0.020864	NA	NA	NA	-0.014878	0.029645	-0.014767	NA	NA	NA	NA	NA	NA	NA	NA	NA	NA	NA	NA	-0.021466	0.038008	-0.016542	NA	NA	NA
211095_at	NF1	0.0238095	0.111111	0.142857	0.0238095	0.111111	0.142857	NA	NA	NA	NA	NA	NA	NA	NA	NA	-0.005765	-3.9e-05	0.005804	-0.111415	-0.074313	0.185729	NA	NA	NA	NA	NA	NA	-0.071442	-0.006997	0.078438	-0.007903	0.002464	0.005439	NA	NA	NA	NA	NA	NA	NA	NA	NA	NA	NA	NA
211181_x_at	RUNX1	0.047619	0.333333	0.142857	0.047619	0.333333	0.142857	NA	NA	NA	NA	NA	NA	-0.01009	0.011071	-0.000981	NA	NA	NA	-0.078968	0.145042	-0.066075	NA	NA	NA	NA	NA	NA	NA	NA	NA	-0.01098	0.013748	-0.002768	NA	NA	NA	-0.036325	0.041926	-0.0056	NA	NA	NA	NA	NA	NA
211377_x_at	MYCN	0	0.333333	0	0	0.333333	0	NA	NA	NA	8.4e-05	0.000777	-0.000861	NA	NA	NA	NA	NA	NA	NA	NA	NA	-0.00043	0.00086	-0.00043	-0.003326	0.015591	-0.012265	NA	NA	NA	NA	NA	NA	-0.001845	0.011063	-0.009218	NA	NA	NA	NA	NA	NA	NA	NA	NA
211467_s_at	NFIB	0.452381	-0.888889	-0.0714286	0.452381	-0.888889	-0.0714286	NA	NA	NA	NA	NA	NA	NA	NA	NA	0.142197	-0.099489	-0.042709	NA	NA	NA	0.042187	-0.022179	-0.020009	NA	NA	NA	NA	NA	NA	0.019597	-0.013616	-0.005981	0.117253	-0.192192	0.074939	NA	NA	NA	NA	NA	NA	NA	NA	NA
211603_s_at	ETV4	0	0.555556	0.285714	0	0.555556	0.285714	NA	NA	NA	NA	NA	NA	-0.178779	0.152331	0.026447	NA	NA	NA	-1.10537	0.930418	0.174953	-0.057647	0.067898	-0.01025	NA	NA	NA	NA	NA	NA	-0.023561	0.034084	-0.010523	NA	NA	NA	NA	NA	NA	NA	NA	NA	NA	NA	NA
211926_s_at	MYH9	0.380952	-0.333333	-0.428571	0.380952	-0.333333	-0.428571	NA	NA	NA	0.769117	-0.274096	-0.495021	0.155509	0.000287	-0.155795	0.138358	0.077235	-0.215593	NA	NA	NA	NA	NA	NA	NA	NA	NA	NA	NA	NA	NA	NA	NA	NA	NA	NA	0.319083	0.044414	-0.363496	NA	NA	NA	NA	NA	NA
212415_at	2006-09-01	-0.0238095	0.111111	-0.142857	-0.0238095	0.111111	-0.142857	0.034456	0.037376	-0.071831	NA	NA	NA	NA	NA	NA	NA	NA	NA	-0.072092	0.798471	-0.726379	NA	NA	NA	NA	NA	NA	NA	NA	NA	0.092853	0.135328	-0.228181	NA	NA	NA	0.104056	0.14497	-0.249026	NA	NA	NA	NA	NA	NA
213033_s_at	NFIB	0.238095	-0.666667	0.0714286	0.238095	-0.666667	0.0714286	NA	NA	NA	NA	NA	NA	NA	NA	NA	0.122951	-0.158938	0.035987	NA	NA	NA	NA	NA	NA	NA	NA	NA	NA	NA	NA	0.015924	-0.014677	-0.001247	0.216133	-0.31557	0.099437	0.405174	-0.358231	-0.046944	NA	NA	NA	NA	NA	NA
213520_at	RECQL4	-0.595238	0.111111	-0.142857	-0.595238	0.111111	-0.142857	NA	NA	NA	-0.118081	0.17184	-0.053759	NA	NA	NA	NA	NA	NA	NA	NA	NA	NA	NA	NA	NA	NA	NA	NA	NA	NA	NA	NA	NA	-0.451707	0.276109	0.175597	-0.206834	0.112058	0.094776	-0.232401	0.122863	0.109539	NA	NA	NA
213578_at	BMPR1A	0.190476	-0.555556	0.214286	0.190476	-0.555556	0.214286	NA	NA	NA	NA	NA	NA	NA	NA	NA	NA	NA	NA	NA	NA	NA	NA	NA	NA	0.051808	-0.17614	0.124332	0.008628	-0.261504	0.252877	NA	NA	NA	0.005107	-0.196982	0.191875	NA	NA	NA	0.032661	-0.099683	0.067022	NA	NA	NA
213579_s_at	EP300	0.0714286	-0.111111	0.0714286	0.0714286	-0.111111	0.0714286	0.047355	-0.225176	0.17782	NA	NA	NA	NA	NA	NA	NA	NA	NA	NA	NA	NA	NA	NA	NA	NA	NA	NA	0.051787	-0.292007	0.240219	NA	NA	NA	0.112803	-0.322231	0.209428	NA	NA	NA	0.073518	-0.154935	0.081417	NA	NA	NA
213666_at	2006-09-01	-0.119048	0.666667	0	-0.119048	0.666667	0	-0.102227	0.06791	0.034317	-0.311829	0.599761	-0.287932	NA	NA	NA	NA	NA	NA	NA	NA	NA	NA	NA	NA	NA	NA	NA	NA	NA	NA	NA	NA	NA	NA	NA	NA	-0.248531	0.20339	0.04514	-0.288853	0.229551	0.059301	NA	NA	NA
213823_at	HOXA11	0.119048	0.222222	0.142857	0.119048	0.222222	0.142857	NA	NA	NA	NA	NA	NA	-0.041477	0.071459	-0.029982	NA	NA	NA	NA	NA	NA	-0.011079	0.010408	0.000671	-0.133343	0.0969	0.036443	NA	NA	NA	NA	NA	NA	-0.08812	0.049228	0.038892	NA	NA	NA	NA	NA	NA	NA	NA	NA
214016_s_at	SFPQ	-0.190476	1	-0.214286	-0.190476	1	-0.214286	NA	NA	NA	NA	NA	NA	-0.030278	0.350612	-0.320334	-0.064987	0.288683	-0.223696	NA	NA	NA	0.002906	0.088111	-0.091017	NA	NA	NA	NA	NA	NA	NA	NA	NA	NA	NA	NA	0.035928	0.213489	-0.249417	NA	NA	NA	NA	NA	NA
214118_x_at	PCM1	-0.0238095	0.444444	-0.0714286	-0.0238095	0.444444	-0.0714286	NA	NA	NA	-0.018346	0.075466	-0.05712	NA	NA	NA	0.013867	0.058005	-0.071872	NA	NA	NA	-0.049541	0.113864	-0.064323	NA	NA	NA	NA	NA	NA	NA	NA	NA	-0.023355	0.05963	-0.036274	NA	NA	NA	NA	NA	NA	NA	NA	NA
214298_x_at	2006-09-01	-0.261905	0.666667	-0.0714286	-0.261905	0.666667	-0.0714286	-0.121865	0.216583	-0.094717	NA	NA	NA	NA	NA	NA	NA	NA	NA	-0.029763	0.03409	-0.004327	NA	NA	NA	NA	NA	NA	NA	NA	NA	NA	NA	NA	NA	NA	NA	-0.208565	0.394749	-0.186184	-0.220525	0.352084	-0.131559	NA	NA	NA
214939_x_at	MLLT4	-0.642857	-0.555556	-0.142857	-0.642857	-0.555556	-0.142857	NA	NA	NA	NA	NA	NA	-0.024882	-0.004216	0.029098	NA	NA	NA	-0.12318	-0.122963	0.246144	NA	NA	NA	NA	NA	NA	NA	NA	NA	NA	NA	NA	-0.045926	0.010387	0.035539	NA	NA	NA	NA	NA	NA	-0.094724	-0.068282	0.163006
215115_x_at	NTRK3	0.142857	0.333333	0	0.142857	0.333333	0	-0.230214	0.465814	-0.235599	NA	NA	NA	-0.080373	0.17095	-0.090576	NA	NA	NA	NA	NA	NA	NA	NA	NA	NA	NA	NA	-0.012427	0.067402	-0.054974	NA	NA	NA	-0.059641	0.127807	-0.068166	NA	NA	NA	NA	NA	NA	NA	NA	NA
215292_s_at	MKL1	-0.0238095	0.555556	0.142857	-0.0238095	0.555556	0.142857	NA	NA	NA	NA	NA	NA	-0.026756	0.033874	-0.007118	NA	NA	NA	NA	NA	NA	NA	NA	NA	-0.119099	0.16351	-0.044411	NA	NA	NA	NA	NA	NA	NA	NA	NA	-0.075172	0.142537	-0.067365	-0.030995	0.022692	0.008303	NA	NA	NA
215310_at	APC	0.047619	0.666667	0.0714286	0.047619	0.666667	0.0714286	NA	NA	NA	-0.161444	0.1881	-0.026656	NA	NA	NA	-0.041851	0.073274	-0.031422	NA	NA	NA	NA	NA	NA	NA	NA	NA	-0.033777	0.047865	-0.014088	NA	NA	NA	NA	NA	NA	NA	NA	NA	-0.015934	0.029056	-0.013121	NA	NA	NA
215575_at	PDE4DIP	-0.571429	-0.111111	-0.5	-0.571429	-0.111111	-0.5	NA	NA	NA	-0.170102	0.213622	-0.043519	-0.038227	0.058503	-0.020276	NA	NA	NA	NA	NA	NA	NA	NA	NA	NA	NA	NA	NA	NA	NA	NA	NA	NA	NA	NA	NA	-0.074621	0.104773	-0.030152	-0.003359	0.003228	0.000132	NA	NA	NA
215881_x_at	SSX3	0.0714286	0.333333	0.0714286	0.0714286	0.333333	0.0714286	-0.035602	0.071205	-0.035602	-0.009349	0.019222	-0.009873	NA	NA	NA	-0.005302	0.01157	-0.006268	NA	NA	NA	NA	NA	NA	-0.027407	0.064591	-0.037184	NA	NA	NA	NA	NA	NA	NA	NA	NA	NA	NA	NA	NA	NA	NA	NA	NA	NA
216375_s_at	ETV5	0.0714286	-0.111111	0.214286	0.0714286	-0.111111	0.214286	NA	NA	NA	NA	NA	NA	NA	NA	NA	NA	NA	NA	NA	NA	NA	NA	NA	NA	NA	NA	NA	-0.01112	-0.234059	0.245179	NA	NA	NA	NA	NA	NA	-0.03177	-0.137103	0.168872	-0.046967	-0.321282	0.368249	0.024322	-0.39097	0.366649
216480_x_at	MLLT10	0.0238095	0.222222	0	0.0238095	0.222222	0	NA	NA	NA	NA	NA	NA	NA	NA	NA	NA	NA	NA	NA	NA	NA	0.000974	0.002589	-0.003563	-0.005499	0.022777	-0.017279	NA	NA	NA	NA	NA	NA	-0.022207	0.052986	-0.030779	NA	NA	NA	3.8e-05	0.000166	-0.000204	NA	NA	NA
216684_s_at	SS18	0.190476	-0.111111	0.142857	0.190476	-0.111111	0.142857	0.162739	-0.194365	0.031625	0.143455	-0.27523	0.131775	NA	NA	NA	0.098841	-0.110047	0.011207	NA	NA	NA	0.108083	-0.055763	-0.05232	NA	NA	NA	NA	NA	NA	NA	NA	NA	NA	NA	NA	NA	NA	NA	NA	NA	NA	NA	NA	NA
216925_s_at	TAL1	0.047619	0.222222	0	0.047619	0.222222	0	-0.055812	0.122654	-0.066842	NA	NA	NA	NA	NA	NA	-0.001064	0.005493	-0.004429	NA	NA	NA	NA	NA	NA	-0.009832	0.214423	-0.204591	NA	NA	NA	NA	NA	NA	NA	NA	NA	NA	NA	NA	NA	NA	NA	-0.007159	0.040679	-0.03352
216986_s_at	IRF4	0.0714286	0.222222	0.142857	0.0714286	0.222222	0.142857	NA	NA	NA	NA	NA	NA	-0.015303	0.02589	-0.010586	NA	NA	NA	NA	NA	NA	-0.016329	0.032205	-0.015876	NA	NA	NA	NA	NA	NA	NA	NA	NA	NA	NA	NA	-0.022776	0.011723	0.011053	NA	NA	NA	-0.019026	0.022741	-0.003714
217061_s_at	ETV1	0.047619	0.444444	0.214286	0.047619	0.444444	0.214286	NA	NA	NA	NA	NA	NA	-0.05093	0.06083	-0.0099	NA	NA	NA	NA	NA	NA	-0.014779	0.012703	0.002076	NA	NA	NA	NA	NA	NA	NA	NA	NA	-0.0383	0.061094	-0.022794	NA	NA	NA	NA	NA	NA	-0.122464	0.110998	0.011465
217263_x_at	RUNX1	0.0714286	0.333333	0.214286	0.0714286	0.333333	0.214286	-0.089312	0.138201	-0.048889	NA	NA	NA	-0.025129	0.043514	-0.018386	NA	NA	NA	-0.064571	0.100333	-0.035762	NA	NA	NA	NA	NA	NA	NA	NA	NA	NA	NA	NA	NA	NA	NA	NA	NA	NA	NA	NA	NA	-0.034704	0.030552	0.004151
218221_at	ARNT	0.261905	-0.222222	-0.0714286	0.261905	-0.222222	-0.0714286	NA	NA	NA	NA	NA	NA	0.183733	-0.096287	-0.087446	0.130396	-0.084999	-0.045398	NA	NA	NA	0.058267	-0.080977	0.022711	NA	NA	NA	NA	NA	NA	NA	NA	NA	NA	NA	NA	0.198301	-0.115329	-0.082972	NA	NA	NA	NA	NA	NA
218902_at	NOTCH1	0.238095	0.666667	-0.642857	0.238095	0.666667	-0.642857	NA	NA	NA	NA	NA	NA	-0.059297	0.252354	-0.193057	NA	NA	NA	NA	NA	NA	-0.087391	0.18741	-0.100019	NA	NA	NA	NA	NA	NA	0.15481	0.184294	-0.339104	NA	NA	NA	NA	NA	NA	0.002021	0.016343	-0.018364	NA	NA	NA
219108_x_at	DDX27	-0.309524	0.777778	0.214286	-0.309524	0.777778	0.214286	NA	NA	NA	NA	NA	NA	NA	NA	NA	-0.404074	0.222147	0.181927	-0.173423	0.312427	-0.139004	NA	NA	NA	NA	NA	NA	NA	NA	NA	-0.192718	0.12165	0.071068	NA	NA	NA	NA	NA	NA	-0.121662	0.151986	-0.030324	NA	NA	NA
219498_s_at	BCL11A	-0.404762	0.222222	-0.214286	-0.404762	0.222222	-0.214286	-0.125095	0.074958	0.050138	NA	NA	NA	-0.223899	0.172654	0.051245	NA	NA	NA	NA	NA	NA	NA	NA	NA	NA	NA	NA	NA	NA	NA	NA	NA	NA	-0.434422	0.279407	0.155015	NA	NA	NA	NA	NA	NA	-0.109312	0.135509	-0.026196
220102_at	FOXL2	0.047619	0.111111	0.0714286	0.047619	0.111111	0.0714286	NA	NA	NA	NA	NA	NA	-0.008635	0.00493	0.003705	NA	NA	NA	-0.104056	0.187304	-0.083248	NA	NA	NA	NA	NA	NA	NA	NA	NA	-0.006485	0.009295	-0.00281	NA	NA	NA	NA	NA	NA	NA	NA	NA	-0.02077	0.02343	-0.00266
221054_s_at	TCL6	0.0238095	0.444444	0	0.0238095	0.444444	0	NA	NA	NA	-7.6e-05	0.013458	-0.013382	NA	NA	NA	-0.004688	0.009842	-0.005153	-0.006568	0.013137	-0.006568	NA	NA	NA	NA	NA	NA	NA	NA	NA	NA	NA	NA	NA	NA	NA	NA	NA	NA	NA	NA	NA	-0.004178	0.065374	-0.061196
221624_at	TCL6	0.047619	0.555556	0	0.047619	0.555556	0	-0.011044	0.022231	-0.011187	NA	NA	NA	NA	NA	NA	NA	NA	NA	-0.000525	0.00105	-0.000525	NA	NA	NA	NA	NA	NA	NA	NA	NA	NA	NA	NA	NA	NA	NA	NA	NA	NA	-0.005176	0.014948	-0.009772	0.005177	0.006365	-0.011542
221658_s_at	IL21R	-0.5	-0.333333	-0.714286	-0.5	-0.333333	-0.714286	-0.046611	0.211294	-0.164684	NA	NA	NA	NA	NA	NA	NA	NA	NA	NA	NA	NA	0.002948	0.03116	-0.034107	NA	NA	NA	NA	NA	NA	NA	NA	NA	0.041858	0.043818	-0.085676	0.039357	0.093555	-0.132912	NA	NA	NA	NA	NA	NA
221726_at	RPL22	0.5	-1	-0.214286	0.5	-1	-0.214286	NA	NA	NA	NA	NA	NA	0.233389	-0.224419	-0.00897	NA	NA	NA	0.47235	-0.316688	-0.155662	NA	NA	NA	NA	NA	NA	NA	NA	NA	NA	NA	NA	NA	NA	NA	0.345831	-0.283384	-0.062447	0.148426	-0.078871	-0.069555	NA	NA	NA
222164_at	FGFR1	-0.238095	0.555556	-0.357143	-0.238095	0.555556	-0.357143	NA	NA	NA	0.082555	0.41457	-0.497124	-0.030172	0.078648	-0.048476	-0.021874	0.060028	-0.038154	NA	NA	NA	NA	NA	NA	NA	NA	NA	NA	NA	NA	NA	NA	NA	NA	NA	NA	NA	NA	NA	-0.116918	0.235141	-0.118223	NA	NA	NA
200033_at	DDX5	0.261905	-0.777778	0.571429	0.261905	-0.777778	0.571429	NA	NA	NA	NA	NA	NA	NA	NA	NA	NA	NA	NA	NA	NA	NA	NA	NA	NA	NA	NA	NA	0.120897	-0.623831	0.502934	NA	NA	NA	NA	NA	NA	NA	NA	NA	0.047635	-0.166839	0.119204	0.052877	-0.190614	0.137737
200063_s_at	NPM1	0.404762	-0.666667	-0.214286	0.404762	-0.666667	-0.214286	0.062875	-0.102847	0.039972	0.018452	-0.01725	-0.001202	0.118749	-0.195055	0.076305	NA	NA	NA	NA	NA	NA	NA	NA	NA	NA	NA	NA	NA	NA	NA	NA	NA	NA	NA	NA	NA	NA	NA	NA	NA	NA	NA	NA	NA	NA
200920_s_at	BTG1	0.166667	-0.444444	-0.285714	0.166667	-0.444444	-0.285714	NA	NA	NA	NA	NA	NA	NA	NA	NA	NA	NA	NA	NA	NA	NA	0.251822	-0.209756	-0.042065	NA	NA	NA	NA	NA	NA	NA	NA	NA	0.474931	-0.580946	0.106015	NA	NA	NA	0.285886	-0.149355	-0.136531	NA	NA	NA
200934_at	DEK	0.547619	-1	-0.0714286	0.547619	-1	-0.0714286	NA	NA	NA	NA	NA	NA	0.21329	-0.365681	0.152391	NA	NA	NA	0.176616	-0.152497	-0.024119	NA	NA	NA	NA	NA	NA	NA	NA	NA	NA	NA	NA	NA	NA	NA	0.490979	-0.311425	-0.179553	NA	NA	NA	NA	NA	NA
200952_s_at	CCND2	-0.761905	0.333333	0	-0.761905	0.333333	0	NA	NA	NA	NA	NA	NA	NA	NA	NA	NA	NA	NA	NA	NA	NA	NA	NA	NA	-0.079871	0.147307	-0.067436	NA	NA	NA	-0.040362	0.039284	0.001078	NA	NA	NA	-0.104701	0.175498	-0.070797	NA	NA	NA	NA	NA	NA
200953_s_at	CCND2	0	-0.555556	0.285714	0	-0.555556	0.285714	NA	NA	NA	NA	NA	NA	NA	NA	NA	0.001696	-0.164636	0.16294	0.044913	-0.961014	0.916101	NA	NA	NA	NA	NA	NA	NA	NA	NA	NA	NA	NA	NA	NA	NA	NA	NA	NA	NA	NA	NA	0.099012	-0.272346	0.173334
201465_s_at	JUN	0.047619	0.444444	-0.857143	0.047619	0.444444	-0.857143	NA	NA	NA	NA	NA	NA	0.100829	0.210167	-0.310996	NA	NA	NA	NA	NA	NA	NA	NA	NA	NA	NA	NA	0.022336	0.026563	-0.0489	NA	NA	NA	NA	NA	NA	NA	NA	NA	NA	NA	NA	0.37701	0.452782	-0.829792
201497_x_at	MYH11	0.190476	0.222222	-0.642857	0.190476	0.222222	-0.642857	0.220431	0.817997	-1.03843	-0.172795	0.42673	-0.253935	NA	NA	NA	NA	NA	NA	NA	NA	NA	NA	NA	NA	NA	NA	NA	NA	NA	NA	NA	NA	NA	NA	NA	NA	NA	NA	NA	-0.06443	0.222404	-0.157974	NA	NA	NA
201660_at	ACSL3	0.261905	-0.777778	0.142857	0.261905	-0.777778	0.142857	NA	NA	NA	NA	NA	NA	NA	NA	NA	NA	NA	NA	0.476164	-0.399304	-0.07686	NA	NA	NA	NA	NA	NA	NA	NA	NA	NA	NA	NA	0.143462	-0.270824	0.127362	NA	NA	NA	NA	NA	NA	0.176943	-0.142522	-0.034421
202013_s_at	EXT2	0.190476	-0.666667	0.214286	0.190476	-0.666667	0.214286	NA	NA	NA	NA	NA	NA	NA	NA	NA	0.078666	-0.195337	0.11667	NA	NA	NA	NA	NA	NA	0.127992	-0.746493	0.618501	0.173525	-0.398034	0.224509	NA	NA	NA	NA	NA	NA	NA	NA	NA	NA	NA	NA	NA	NA	NA
202221_s_at	EP300	-0.0952381	0.888889	-0.428571	-0.0952381	0.888889	-0.428571	NA	NA	NA	0.032739	0.036991	-0.06973	NA	NA	NA	-0.014087	0.150295	-0.136208	NA	NA	NA	NA	NA	NA	-0.000458	0.17073	-0.170271	NA	NA	NA	NA	NA	NA	NA	NA	NA	NA	NA	NA	NA	NA	NA	NA	NA	NA
202311_s_at	COL1A1	-0.047619	0.222222	-0.285714	-0.047619	0.222222	-0.285714	NA	NA	NA	NA	NA	NA	NA	NA	NA	NA	NA	NA	NA	NA	NA	NA	NA	NA	-0.019235	0.051821	-0.032586	NA	NA	NA	0.106924	0.247006	-0.35393	NA	NA	NA	0.495463	0.735415	-1.23088	NA	NA	NA	NA	NA	NA
202383_at	KDM5C	-0.142857	0.111111	-0.428571	-0.142857	0.111111	-0.428571	NA	NA	NA	-0.025771	0.061805	-0.036035	NA	NA	NA	NA	NA	NA	NA	NA	NA	-0.089863	0.196634	-0.106771	NA	NA	NA	-0.030476	0.154526	-0.12405	NA	NA	NA	NA	NA	NA	NA	NA	NA	NA	NA	NA	NA	NA	NA
203140_at	BCL6	-0.0238095	0.333333	-0.357143	-0.0238095	0.333333	-0.357143	NA	NA	NA	-0.005712	0.026065	-0.020353	NA	NA	NA	NA	NA	NA	NA	NA	NA	-0.041166	0.168321	-0.127155	NA	NA	NA	NA	NA	NA	NA	NA	NA	NA	NA	NA	NA	NA	NA	0.306109	0.370929	-0.677038	NA	NA	NA
203348_s_at	ETV5	-0.285714	0.333333	0.5	-0.285714	0.333333	0.5	NA	NA	NA	NA	NA	NA	NA	NA	NA	NA	NA	NA	-0.916753	-0.170366	1.08712	NA	NA	NA	NA	NA	NA	NA	NA	NA	NA	NA	NA	-0.30008	-0.106231	0.406311	NA	NA	NA	-0.16208	-0.031692	0.193771	NA	NA	NA
203490_at	ELF4	-0.047619	0.222222	-0.0714286	-0.047619	0.222222	-0.0714286	NA	NA	NA	NA	NA	NA	-0.01505	0.057352	-0.042301	NA	NA	NA	NA	NA	NA	NA	NA	NA	NA	NA	NA	NA	NA	NA	NA	NA	NA	-0.047975	0.124464	-0.076489	0.035395	0.207242	-0.242637	NA	NA	NA	NA	NA	NA
203638_s_at	FGFR2	0.0714286	-0.111111	-0.0714286	0.0714286	-0.111111	-0.0714286	0.220484	-0.313627	0.093143	NA	NA	NA	NA	NA	NA	NA	NA	NA	0.382273	-0.700572	0.318299	NA	NA	NA	NA	NA	NA	0.204326	-0.357007	0.15268	NA	NA	NA	NA	NA	NA	NA	NA	NA	NA	NA	NA	NA	NA	NA
203749_s_at	RARA	0.0952381	0.555556	-0.785714	0.0952381	0.555556	-0.785714	NA	NA	NA	NA	NA	NA	NA	NA	NA	-0.028054	0.120498	-0.092444	NA	NA	NA	NA	NA	NA	NA	NA	NA	NA	NA	NA	0.068038	0.125834	-0.193872	0.060375	0.085786	-0.146161	NA	NA	NA	NA	NA	NA	NA	NA	NA
204010_s_at	KRAS	-0.0952381	0.666667	0.214286	-0.0952381	0.666667	0.214286	-0.010185	0.007285	0.002901	NA	NA	NA	NA	NA	NA	NA	NA	NA	NA	NA	NA	-0.011123	0.008947	0.002177	NA	NA	NA	NA	NA	NA	NA	NA	NA	NA	NA	NA	NA	NA	NA	-0.053909	0.059987	-0.006078	NA	NA	NA
204096_s_at	ELL	0.047619	0.444444	-0.142857	0.047619	0.444444	-0.142857	NA	NA	NA	0.043266	0.094271	-0.137538	NA	NA	NA	NA	NA	NA	-0.047081	0.100277	-0.053196	NA	NA	NA	NA	NA	NA	NA	NA	NA	-0.002465	0.033788	-0.031323	NA	NA	NA	NA	NA	NA	NA	NA	NA	NA	NA	NA
204325_s_at	NF1	-0.0952381	0.444444	0.357143	-0.0952381	0.444444	0.357143	NA	NA	NA	NA	NA	NA	NA	NA	NA	NA	NA	NA	NA	NA	NA	NA	NA	NA	-0.019104	0.012592	0.006511	NA	NA	NA	NA	NA	NA	-0.02974	0.019602	0.010139	NA	NA	NA	-0.002464	0.00473	-0.002266	NA	NA	NA
204783_at	MLF1	-0.047619	-0.777778	-0.0714286	-0.047619	-0.777778	-0.0714286	NA	NA	NA	0.085616	-0.08793	0.002313	NA	NA	NA	0.201998	-0.119802	-0.082195	NA	NA	NA	NA	NA	NA	NA	NA	NA	NA	NA	NA	0.10314	-0.054604	-0.048536	NA	NA	NA	NA	NA	NA	NA	NA	NA	NA	NA	NA
204798_at	MYB	0	0.444444	0.0714286	0	0.444444	0.0714286	-0.26662	0.318458	-0.051839	-0.103823	0.100948	0.002875	NA	NA	NA	NA	NA	NA	NA	NA	NA	-0.165184	0.128751	0.036433	NA	NA	NA	NA	NA	NA	NA	NA	NA	NA	NA	NA	NA	NA	NA	NA	NA	NA	NA	NA	NA
205049_s_at	CD79A	0	0.555556	0.142857	0	0.555556	0.142857	NA	NA	NA	NA	NA	NA	NA	NA	NA	NA	NA	NA	NA	NA	NA	NA	NA	NA	-0.244181	0.327632	-0.083451	NA	NA	NA	-0.198636	0.20648	-0.007843	NA	NA	NA	NA	NA	NA	-0.025223	0.041472	-0.01625	NA	NA	NA
205426_s_at	HIP1	0.119048	0.111111	0	0.119048	0.111111	0	0.015391	-0.007696	-0.007696	NA	NA	NA	NA	NA	NA	NA	NA	NA	NA	NA	NA	NA	NA	NA	NA	NA	NA	NA	NA	NA	NA	NA	NA	0.020236	0.011335	-0.031571	0.161714	0.008089	-0.169803	NA	NA	NA	NA	NA	NA
205587_at	FGFR1OP	0	0.222222	0	0	0.222222	0	NA	NA	NA	-0.00021	0.000944	-0.000734	NA	NA	NA	NA	NA	NA	NA	NA	NA	NA	NA	NA	NA	NA	NA	-0.000234	0.004991	-0.004756	NA	NA	NA	0.001879	0.006074	-0.007952	NA	NA	NA	NA	NA	NA	NA	NA	NA
205842_s_at	JAK2	0.0714286	-0.222222	-0.285714	0.0714286	-0.222222	-0.285714	0.250822	0.014113	-0.264935	NA	NA	NA	NA	NA	NA	NA	NA	NA	NA	NA	NA	NA	NA	NA	NA	NA	NA	NA	NA	NA	0.768227	-0.314358	-0.453869	NA	NA	NA	NA	NA	NA	0.03843	-0.012211	-0.026219	NA	NA	NA
206626_x_at	SSX1	0	0.222222	0.0714286	0	0.222222	0.0714286	-0.151755	0.205306	-0.053552	NA	NA	NA	NA	NA	NA	NA	NA	NA	-0.88604	1.37433	-0.488293	NA	NA	NA	NA	NA	NA	NA	NA	NA	NA	NA	NA	NA	NA	NA	NA	NA	NA	-0.01265	0.022063	-0.009413	NA	NA	NA
206641_at	TNFRSF17	0.119048	0.222222	0.0714286	0.119048	0.222222	0.0714286	0.148804	0.459402	-0.608206	0.000419	0.000629	-0.001048	NA	NA	NA	NA	NA	NA	NA	NA	NA	NA	NA	NA	NA	NA	NA	NA	NA	NA	NA	NA	NA	NA	NA	NA	-0.116084	0.28509	-0.169007	NA	NA	NA	NA	NA	NA
206674_at	FLT3	0.142857	0.111111	0.0714286	0.142857	0.111111	0.0714286	NA	NA	NA	NA	NA	NA	0.022957	-0.005592	-0.017365	NA	NA	NA	0.024371	-0.012185	-0.012185	NA	NA	NA	NA	NA	NA	NA	NA	NA	NA	NA	NA	0.00383	-0.001056	-0.002774	NA	NA	NA	NA	NA	NA	NA	NA	NA
207540_s_at	SYK	-0.142857	-0.222222	0.428571	-0.142857	-0.222222	0.428571	NA	NA	NA	NA	NA	NA	NA	NA	NA	-0.011943	-0.170427	0.182371	NA	NA	NA	NA	NA	NA	-0.016096	-0.481661	0.497757	NA	NA	NA	NA	NA	NA	-0.119562	-0.183662	0.303223	NA	NA	NA	NA	NA	NA	NA	NA	NA
207680_x_at	PAX3	0	0.222222	0	0	0.222222	0	NA	NA	NA	NA	NA	NA	NA	NA	NA	NA	NA	NA	NA	NA	NA	NA	NA	NA	NA	NA	NA	-0.003565	0.010817	-0.007252	NA	NA	NA	0.000983	0.00619	-0.007173	NA	NA	NA	0.004715	0.034254	-0.038969	NA	NA	NA
207849_at	IL2	0.0714286	0.333333	0.0714286	0.0714286	0.333333	0.0714286	NA	NA	NA	NA	NA	NA	NA	NA	NA	NA	NA	NA	NA	NA	NA	-0.001363	0.002727	-0.001363	NA	NA	NA	-0.005764	0.016789	-0.011025	NA	NA	NA	-0.004432	0.014066	-0.009634	NA	NA	NA	NA	NA	NA	NA	NA	NA
207921_x_at	PAX8	-0.357143	0.111111	0.428571	-0.357143	0.111111	0.428571	NA	NA	NA	NA	NA	NA	NA	NA	NA	NA	NA	NA	NA	NA	NA	NA	NA	NA	NA	NA	NA	NA	NA	NA	NA	NA	NA	-0.422385	-0.175419	0.597804	-0.299956	-0.241044	0.541	NA	NA	NA	-0.01915	-0.013	0.032149
207923_x_at	PAX8	-0.309524	0.222222	0.428571	-0.309524	0.222222	0.428571	-0.010792	0.001651	0.00914	NA	NA	NA	NA	NA	NA	NA	NA	NA	NA	NA	NA	NA	NA	NA	NA	NA	NA	NA	NA	NA	NA	NA	NA	-0.532462	-0.106311	0.638773	-0.330358	-0.155357	0.485714	NA	NA	NA	NA	NA	NA
207937_x_at	FGFR1	-0.0238095	0.222222	0.214286	-0.0238095	0.222222	0.214286	-0.02872	0.047886	-0.019166	NA	NA	NA	-0.035739	0.019036	0.016704	-0.00946	0.014559	-0.005099	NA	NA	NA	NA	NA	NA	NA	NA	NA	NA	NA	NA	NA	NA	NA	NA	NA	NA	NA	NA	NA	NA	NA	NA	NA	NA	NA
208026_at	HIST1H4F	0.0238095	0.333333	0	0.0238095	0.333333	0	NA	NA	NA	-0.00021	0.000944	-0.000734	NA	NA	NA	NA	NA	NA	NA	NA	NA	NA	NA	NA	NA	NA	NA	-7e-05	0.004534	-0.004464	NA	NA	NA	NA	NA	NA	NA	NA	NA	-0.000179	0.000357	-0.000179	NA	NA	NA
208060_at	PAX7	0.0238095	0	0.0714286	0.0238095	0	0.0714286	NA	NA	NA	NA	NA	NA	NA	NA	NA	0.00029	-0.001293	0.001003	NA	NA	NA	NA	NA	NA	NA	NA	NA	NA	NA	NA	-0.000298	-0.003115	0.003413	NA	NA	NA	NA	NA	NA	NA	NA	NA	-0.077336	-0.284143	0.361479
208181_at	HIST1H4H	0	0.333333	0.0714286	0	0.333333	0.0714286	NA	NA	NA	-0.000493	0.00066	-0.000167	NA	NA	NA	NA	NA	NA	NA	NA	NA	-0.010616	0.0209	-0.010284	NA	NA	NA	NA	NA	NA	NA	NA	NA	NA	NA	NA	-0.021412	0.014228	0.007184	NA	NA	NA	NA	NA	NA
208212_s_at	ALK	0.0238095	0.333333	0	0.0238095	0.333333	0	NA	NA	NA	NA	NA	NA	NA	NA	NA	NA	NA	NA	NA	NA	NA	0.009245	0.012333	-0.021578	-0.054102	0.220786	-0.166684	NA	NA	NA	-0.025718	0.069723	-0.044004	NA	NA	NA	NA	NA	NA	NA	NA	NA	NA	NA	NA
208512_s_at	MLLT4	0.0714286	0.333333	0	0.0714286	0.333333	0	-4e-05	0.000332	-0.000293	-0.038121	0.128844	-0.090723	NA	NA	NA	NA	NA	NA	NA	NA	NA	NA	NA	NA	0.005325	0.007097	-0.012423	NA	NA	NA	NA	NA	NA	NA	NA	NA	NA	NA	NA	NA	NA	NA	NA	NA	NA
208580_x_at	HIST1H4J	0.0238095	0.333333	0.0714286	0.0238095	0.333333	0.0714286	NA	NA	NA	-0.030236	0.022741	0.007495	NA	NA	NA	NA	NA	NA	-0.612015	0.494519	0.117495	-0.148943	0.087705	0.061237	NA	NA	NA	NA	NA	NA	NA	NA	NA	NA	NA	NA	NA	NA	NA	NA	NA	NA	NA	NA	NA
208635_x_at	NACA	0.5	-0.888889	0.285714	0.5	-0.888889	0.285714	NA	NA	NA	NA	NA	NA	0.127448	-0.161928	0.03448	NA	NA	NA	0.081843	-0.16224	0.080397	NA	NA	NA	NA	NA	NA	NA	NA	NA	NA	NA	NA	NA	NA	NA	NA	NA	NA	0.078921	-0.063788	-0.015133	NA	NA	NA
208768_x_at	RPL22	0.309524	-0.222222	-0.357143	0.309524	-0.222222	-0.357143	NA	NA	NA	NA	NA	NA	0.054775	-0.007996	-0.046779	NA	NA	NA	NA	NA	NA	NA	NA	NA	NA	NA	NA	NA	NA	NA	NA	NA	NA	NA	NA	NA	0.152025	0.045058	-0.197083	0.094992	-0.017871	-0.077121	NA	NA	NA
208885_at	LCP1	0.357143	-0.777778	-0.142857	0.357143	-0.777778	-0.142857	NA	NA	NA	NA	NA	NA	NA	NA	NA	NA	NA	NA	NA	NA	NA	NA	NA	NA	NA	NA	NA	0.573577	-0.305802	-0.267775	0.199753	-0.178396	-0.021357	0.094087	-0.106034	0.011947	NA	NA	NA	NA	NA	NA	NA	NA	NA
209383_at	DDIT3	-0.190476	-0.222222	0.5	-0.190476	-0.222222	0.5	NA	NA	NA	NA	NA	NA	NA	NA	NA	NA	NA	NA	-0.129503	-0.179423	0.308926	NA	NA	NA	NA	NA	NA	-0.178505	-0.382093	0.560598	NA	NA	NA	NA	NA	NA	-0.166834	-0.173859	0.340693	NA	NA	NA	NA	NA	NA
209444_at	RAP1GDS1	0.333333	-0.666667	0.214286	0.333333	-0.666667	0.214286	NA	NA	NA	NA	NA	NA	NA	NA	NA	NA	NA	NA	0.178596	-0.280999	0.102403	NA	NA	NA	NA	NA	NA	NA	NA	NA	NA	NA	NA	NA	NA	NA	0.103094	-0.139856	0.036762	0.130833	-0.171607	0.040774	NA	NA	NA
209602_s_at	GATA3	0.0714286	0.111111	0.142857	0.0714286	0.111111	0.142857	NA	NA	NA	-0.010785	-0.009632	0.020417	NA	NA	NA	NA	NA	NA	NA	NA	NA	NA	NA	NA	NA	NA	NA	NA	NA	NA	NA	NA	NA	NA	NA	NA	-0.948904	0.236004	0.7129	-0.015219	-0.010681	0.0259	NA	NA	NA
209756_s_at	MYCN	0.0238095	0.333333	0	0.0238095	0.333333	0	NA	NA	NA	0.019014	0.083929	-0.102943	NA	NA	NA	NA	NA	NA	-0.007594	0.015188	-0.007594	NA	NA	NA	-0.005089	0.032069	-0.026981	NA	NA	NA	NA	NA	NA	NA	NA	NA	NA	NA	NA	NA	NA	NA	NA	NA	NA
210012_s_at	EWSR1	0	0.333333	0.285714	0	0.333333	0.285714	NA	NA	NA	NA	NA	NA	NA	NA	NA	-0.066876	0.062461	0.004416	-0.139679	0.215181	-0.075502	NA	NA	NA	NA	NA	NA	NA	NA	NA	NA	NA	NA	NA	NA	NA	NA	NA	NA	NA	NA	NA	-0.12391	0.079798	0.044112
210160_at	PAFAH1B2	-0.214286	0	0.214286	-0.214286	0	0.214286	NA	NA	NA	NA	NA	NA	NA	NA	NA	NA	NA	NA	-0.270679	0.133545	0.137134	NA	NA	NA	-0.087329	-0.037759	0.125088	NA	NA	NA	NA	NA	NA	NA	NA	NA	-0.157766	-0.003764	0.16153	NA	NA	NA	NA	NA	NA
210266_s_at	TRIM33	-0.357143	1	-0.0714286	-0.357143	1	-0.0714286	NA	NA	NA	-0.407586	0.28084	0.126746	NA	NA	NA	-0.185459	0.104542	0.080917	NA	NA	NA	NA	NA	NA	NA	NA	NA	NA	NA	NA	NA	NA	NA	NA	NA	NA	NA	NA	NA	-0.20029	0.252203	-0.051912	NA	NA	NA
210358_x_at	GATA2	0	0.444444	-0.428571	0	0.444444	-0.428571	NA	NA	NA	NA	NA	NA	NA	NA	NA	NA	NA	NA	-0.021006	0.047652	-0.026646	NA	NA	NA	NA	NA	NA	0.004201	0.064706	-0.068907	NA	NA	NA	NA	NA	NA	-0.007751	0.073102	-0.06535	NA	NA	NA	NA	NA	NA
210394_x_at	SSX4	0	0.111111	0.0714286	0	0.111111	0.0714286	-0.231711	0.2701	-0.038389	NA	NA	NA	NA	NA	NA	NA	NA	NA	-1.28471	1.23361	0.051102	NA	NA	NA	NA	NA	NA	NA	NA	NA	NA	NA	NA	NA	NA	NA	NA	NA	NA	NA	NA	NA	-0.145355	0.109642	0.035713
210497_x_at	SSX2	0	0.222222	0.0714286	0	0.222222	0.0714286	-0.091585	0.173953	-0.082369	NA	NA	NA	NA	NA	NA	NA	NA	NA	-0.703875	1.24731	-0.54343	NA	NA	NA	NA	NA	NA	NA	NA	NA	NA	NA	NA	NA	NA	NA	NA	NA	NA	NA	NA	NA	-0.128297	0.13648	-0.008183
210631_at	NF1	0.142857	0.111111	0.285714	0.142857	0.111111	0.285714	NA	NA	NA	NA	NA	NA	NA	NA	NA	NA	NA	NA	NA	NA	NA	NA	NA	NA	0.029559	-0.146476	0.116917	-0.136929	-0.243179	0.380109	NA	NA	NA	NA	NA	NA	-0.057518	-0.098613	0.156132	NA	NA	NA	NA	NA	NA
210828_s_at	ARNT	-0.0714286	0.555556	0.142857	-0.0714286	0.555556	0.142857	NA	NA	NA	NA	NA	NA	-0.004449	0.004075	0.000375	NA	NA	NA	NA	NA	NA	NA	NA	NA	NA	NA	NA	NA	NA	NA	-0.006302	0.010258	-0.003957	NA	NA	NA	-0.021835	0.040309	-0.018474	NA	NA	NA	NA	NA	NA
211094_s_at	NF1	-0.619048	-0.222222	0.214286	-0.619048	-0.222222	0.214286	NA	NA	NA	NA	NA	NA	-0.040964	0.018139	0.022825	NA	NA	NA	-0.139296	-0.112523	0.25182	NA	NA	NA	-0.107681	0.021223	0.086458	NA	NA	NA	NA	NA	NA	NA	NA	NA	NA	NA	NA	NA	NA	NA	NA	NA	NA
211108_s_at	JAK3	0	0.111111	0	0	0.111111	0	NA	NA	NA	-0.00021	0.000944	-0.000734	NA	NA	NA	NA	NA	NA	NA	NA	NA	-0.000335	0.00067	-0.000335	NA	NA	NA	NA	NA	NA	NA	NA	NA	-0.002818	0.010512	-0.007694	NA	NA	NA	NA	NA	NA	NA	NA	NA
211109_at	JAK3	0	0.222222	0	0	0.222222	0	NA	NA	NA	-1.3e-05	0.000845	-0.000832	NA	NA	NA	NA	NA	NA	NA	NA	NA	NA	NA	NA	-0.001206	0.005641	-0.004435	NA	NA	NA	NA	NA	NA	-0.007365	0.033261	-0.025896	NA	NA	NA	NA	NA	NA	NA	NA	NA
211425_x_at	SSX4	0	0.222222	0.0714286	0	0.222222	0.0714286	-0.185865	0.223682	-0.037818	NA	NA	NA	NA	NA	NA	NA	NA	NA	-1.00363	1.28046	-0.276831	NA	NA	NA	NA	NA	NA	NA	NA	NA	NA	NA	NA	NA	NA	NA	NA	NA	NA	NA	NA	NA	-0.08138	0.113798	-0.032418
211426_x_at	GNAQ	-0.428571	-1	-0.357143	-0.428571	-1	-0.357143	NA	NA	NA	NA	NA	NA	NA	NA	NA	0.00781	-0.065438	0.057628	NA	NA	NA	NA	NA	NA	NA	NA	NA	0.056427	-0.328301	0.271874	NA	NA	NA	NA	NA	NA	0.033225	-0.215844	0.182619	NA	NA	NA	NA	NA	NA
211453_s_at	AKT2	0.0238095	0.222222	0.214286	0.0238095	0.222222	0.214286	NA	NA	NA	NA	NA	NA	NA	NA	NA	NA	NA	NA	-0.080699	0.100824	-0.020125	NA	NA	NA	-0.068423	0.117521	-0.049097	NA	NA	NA	-0.098779	0.085717	0.013062	NA	NA	NA	NA	NA	NA	NA	NA	NA	NA	NA	NA
211550_at	EGFR	0	0.111111	0	0	0.111111	0	NA	NA	NA	NA	NA	NA	NA	NA	NA	NA	NA	NA	NA	NA	NA	NA	NA	NA	0.00141	0.007832	-0.009242	NA	NA	NA	NA	NA	NA	-0.009142	0.03079	-0.021648	NA	NA	NA	NA	NA	NA	-0.003214	0.007691	-0.004478
211599_x_at	MET	0.047619	-1	0.285714	0.047619	-1	0.285714	NA	NA	NA	NA	NA	NA	NA	NA	NA	0.207411	-0.763453	0.556041	NA	NA	NA	0.171575	-0.572903	0.401328	NA	NA	NA	0.220183	-0.539337	0.319154	NA	NA	NA	NA	NA	NA	NA	NA	NA	NA	NA	NA	NA	NA	NA
211626_x_at	ERG	0.309524	0.222222	-0.428571	0.309524	0.222222	-0.428571	NA	NA	NA	NA	NA	NA	NA	NA	NA	0.051158	0.038179	-0.089337	0.21839	-0.091989	-0.126402	NA	NA	NA	NA	NA	NA	NA	NA	NA	NA	NA	NA	NA	NA	NA	0.517663	-0.011391	-0.506272	NA	NA	NA	NA	NA	NA
211751_at	PDE4DIP	0.0238095	0.555556	0.214286	0.0238095	0.555556	0.214286	NA	NA	NA	-0.395303	0.26919	0.126113	-0.01699	0.033533	-0.016544	NA	NA	NA	NA	NA	NA	-0.010498	0.017707	-0.00721	NA	NA	NA	NA	NA	NA	NA	NA	NA	NA	NA	NA	NA	NA	NA	NA	NA	NA	NA	NA	NA
211832_s_at	MDM2	0.0952381	0.555556	0.142857	0.0952381	0.555556	0.142857	-0.137743	0.24264	-0.104897	NA	NA	NA	-0.06362	0.081317	-0.017697	NA	NA	NA	-0.090898	0.141093	-0.050195	NA	NA	NA	NA	NA	NA	NA	NA	NA	NA	NA	NA	NA	NA	NA	NA	NA	NA	NA	NA	NA	NA	NA	NA
212234_at	ASXL1	-0.285714	1	-0.0714286	-0.285714	1	-0.0714286	NA	NA	NA	-0.105635	0.135532	-0.029897	NA	NA	NA	-0.260295	0.148695	0.1116	NA	NA	NA	NA	NA	NA	NA	NA	NA	NA	NA	NA	NA	NA	NA	NA	NA	NA	NA	NA	NA	-0.082951	0.062943	0.020008	NA	NA	NA
212273_x_at	GNAS	-0.166667	0.555556	0.214286	-0.166667	0.555556	0.214286	NA	NA	NA	-0.075519	0.094371	-0.018852	NA	NA	NA	NA	NA	NA	NA	NA	NA	-0.034525	0.052265	-0.01774	NA	NA	NA	NA	NA	NA	NA	NA	NA	NA	NA	NA	-0.1038	0.164074	-0.060274	NA	NA	NA	NA	NA	NA
212288_at	FNBP1	0.0714286	0.333333	-0.214286	0.0714286	0.333333	-0.214286	NA	NA	NA	0.057441	0.191271	-0.248712	NA	NA	NA	NA	NA	NA	NA	NA	NA	NA	NA	NA	NA	NA	NA	NA	NA	NA	NA	NA	NA	0.054619	0.151615	-0.206235	NA	NA	NA	0.001127	0.067527	-0.068654	NA	NA	NA
212377_s_at	NOTCH2	0.047619	-0.777778	0.642857	0.047619	-0.777778	0.642857	NA	NA	NA	NA	NA	NA	NA	NA	NA	NA	NA	NA	NA	NA	NA	NA	NA	NA	NA	NA	NA	NA	NA	NA	NA	NA	NA	0.153758	-0.339992	0.186234	NA	NA	NA	0.066686	-0.305255	0.238568	0.031662	-0.219218	0.187557
212547_at	BRD3	-0.261905	0.222222	0.571429	-0.261905	0.222222	0.571429	NA	NA	NA	NA	NA	NA	NA	NA	NA	NA	NA	NA	NA	NA	NA	-0.154057	0.060033	0.094024	NA	NA	NA	NA	NA	NA	NA	NA	NA	-0.019194	0.008668	0.010525	NA	NA	NA	NA	NA	NA	-0.20063	0.020723	0.179907
212624_s_at	CHN1	0.0714286	-0.888889	-0.285714	0.0714286	-0.888889	-0.285714	NA	NA	NA	NA	NA	NA	0.404265	-0.262903	-0.141363	NA	NA	NA	NA	NA	NA	NA	NA	NA	0.049573	-0.0537	0.004128	NA	NA	NA	NA	NA	NA	NA	NA	NA	NA	NA	NA	0.113527	-0.17354	0.060014	NA	NA	NA
212748_at	MKL1	-0.047619	0.555556	-0.357143	-0.047619	0.555556	-0.357143	NA	NA	NA	NA	NA	NA	0.025707	0.115111	-0.140819	NA	NA	NA	NA	NA	NA	NA	NA	NA	NA	NA	NA	NA	NA	NA	NA	NA	NA	NA	NA	NA	0.140238	0.26456	-0.404798	-0.026318	0.06299	-0.036672	NA	NA	NA
213047_x_at	SET	0.47619	-1	0.428571	0.47619	-1	0.428571	NA	NA	NA	NA	NA	NA	0.269388	-0.478765	0.209378	NA	NA	NA	0.092789	-0.132729	0.039941	NA	NA	NA	NA	NA	NA	NA	NA	NA	NA	NA	NA	NA	NA	NA	0.272453	-0.488633	0.21618	NA	NA	NA	NA	NA	NA
213693_s_at	MUC1	-0.047619	0.666667	0	-0.047619	0.666667	0	NA	NA	NA	NA	NA	NA	NA	NA	NA	NA	NA	NA	NA	NA	NA	-0.22885	0.314335	-0.085485	-0.14907	0.1482	0.00087	NA	NA	NA	NA	NA	NA	NA	NA	NA	-0.501572	0.367719	0.133853	NA	NA	NA	NA	NA	NA
213731_s_at	TCF3	0.0952381	0.111111	0.0714286	0.0952381	0.111111	0.0714286	NA	NA	NA	-0.00021	0.000944	-0.000734	NA	NA	NA	NA	NA	NA	NA	NA	NA	NA	NA	NA	NA	NA	NA	-0.003889	0.012308	-0.008419	-0.002727	0.007146	-0.004419	NA	NA	NA	NA	NA	NA	NA	NA	NA	NA	NA	NA
213788_s_at	BRD3	-0.142857	-0.666667	0.357143	-0.142857	-0.666667	0.357143	NA	NA	NA	NA	NA	NA	NA	NA	NA	NA	NA	NA	NA	NA	NA	NA	NA	NA	NA	NA	NA	-0.135565	-0.26681	0.402375	NA	NA	NA	NA	NA	NA	0.060689	-0.161	0.100311	NA	NA	NA	-0.010727	-0.287631	0.298359
213811_x_at	TCF3	-0.142857	0.888889	-0.0714286	-0.142857	0.888889	-0.0714286	NA	NA	NA	NA	NA	NA	-0.06255	0.083594	-0.021044	-0.151401	0.080733	0.070668	NA	NA	NA	NA	NA	NA	NA	NA	NA	NA	NA	NA	NA	NA	NA	-0.181194	0.104275	0.076919	NA	NA	NA	NA	NA	NA	NA	NA	NA
213816_s_at	MET	-0.357143	0.777778	0.428571	-0.357143	0.777778	0.428571	NA	NA	NA	NA	NA	NA	-0.034057	0.021697	0.01236	NA	NA	NA	NA	NA	NA	-0.012007	0.010307	0.0017	NA	NA	NA	NA	NA	NA	NA	NA	NA	NA	NA	NA	NA	NA	NA	-0.022277	0.024896	-0.00262	NA	NA	NA
213824_at	OLIG2	0.0238095	0.111111	0	0.0238095	0.111111	0	NA	NA	NA	NA	NA	NA	NA	NA	NA	NA	NA	NA	NA	NA	NA	NA	NA	NA	0.002315	0.004811	-0.007126	-0.003732	0.011944	-0.008212	NA	NA	NA	-0.000604	0.010449	-0.009846	NA	NA	NA	NA	NA	NA	NA	NA	NA
213825_at	OLIG2	0.047619	0.444444	0	0.047619	0.444444	0	-0.204138	0.408277	-0.204138	NA	NA	NA	NA	NA	NA	NA	NA	NA	NA	NA	NA	NA	NA	NA	NA	NA	NA	NA	NA	NA	NA	NA	NA	-0.027858	0.066469	-0.038612	NA	NA	NA	-0.000908	0.001927	-0.001018	NA	NA	NA
214042_s_at	RPL22	0.380952	-0.888889	-0.142857	0.380952	-0.888889	-0.142857	NA	NA	NA	NA	NA	NA	0.08211	-0.052817	-0.029294	NA	NA	NA	0.250285	-0.206102	-0.044184	NA	NA	NA	NA	NA	NA	NA	NA	NA	NA	NA	NA	NA	NA	NA	0.231666	-0.151779	-0.079886	NA	NA	NA	NA	NA	NA
214477_at	MLLT1	0.0238095	0	0.0714286	0.0238095	0	0.0714286	NA	NA	NA	NA	NA	NA	NA	NA	NA	0.000629	-0.002417	0.001788	NA	NA	NA	NA	NA	NA	NA	NA	NA	NA	NA	NA	NA	NA	NA	-0.010409	-0.012402	0.02281	NA	NA	NA	NA	NA	NA	0.000193	-0.008281	0.008088
214528_s_at	PAX8	-0.119048	-0.222222	0.428571	-0.119048	-0.222222	0.428571	-0.116987	-0.128181	0.245168	NA	NA	NA	NA	NA	NA	NA	NA	NA	NA	NA	NA	NA	NA	NA	NA	NA	NA	NA	NA	NA	NA	NA	NA	NA	NA	NA	-0.230842	-0.525158	0.755999	0.038873	-0.588657	0.549784	NA	NA	NA
214604_at	HOXD11	0.119048	0.222222	-0.357143	0.119048	0.222222	-0.357143	-0.125833	0.283078	-0.157245	NA	NA	NA	NA	NA	NA	NA	NA	NA	NA	NA	NA	NA	NA	NA	-0.002058	0.021274	-0.019216	NA	NA	NA	NA	NA	NA	NA	NA	NA	-0.118166	0.239539	-0.121373	NA	NA	NA	NA	NA	NA
214651_s_at	HOXA9	-0.0952381	-0.777778	0.5	-0.0952381	-0.777778	0.5	NA	NA	NA	NA	NA	NA	NA	NA	NA	NA	NA	NA	NA	NA	NA	NA	NA	NA	NA	NA	NA	NA	NA	NA	NA	NA	NA	-0.116704	-0.16218	0.278884	-0.020448	-0.917238	0.937686	-0.046331	-0.160744	0.207075	NA	NA	NA
214985_at	EXT1	-0.714286	0.333333	-0.285714	-0.714286	0.333333	-0.285714	NA	NA	NA	NA	NA	NA	-0.034844	0.037466	-0.002622	NA	NA	NA	NA	NA	NA	-0.013319	0.023329	-0.01001	NA	NA	NA	NA	NA	NA	NA	NA	NA	-0.021705	0.042018	-0.020313	NA	NA	NA	NA	NA	NA	NA	NA	NA
215442_s_at	TSHR	0.0714286	0.111111	0.214286	0.0714286	0.111111	0.214286	NA	NA	NA	NA	NA	NA	NA	NA	NA	NA	NA	NA	NA	NA	NA	NA	NA	NA	NA	NA	NA	-0.054564	0.0131	0.041465	NA	NA	NA	NA	NA	NA	-0.012028	-0.001369	0.013397	-0.001919	0.000245	0.001674	NA	NA	NA
215443_at	TSHR	0.0714286	0.111111	0	0.0714286	0.111111	0	-0.003173	0.006345	-0.003173	NA	NA	NA	-0.000945	0.00502	-0.004076	NA	NA	NA	-0.002467	0.013059	-0.010591	NA	NA	NA	NA	NA	NA	NA	NA	NA	NA	NA	NA	NA	NA	NA	NA	NA	NA	NA	NA	NA	NA	NA	NA
215698_at	KDM5A	-0.380952	0.888889	0.214286	-0.380952	0.888889	0.214286	NA	NA	NA	NA	NA	NA	NA	NA	NA	NA	NA	NA	-0.296873	0.231633	0.065241	-0.181171	0.108126	0.073045	-0.184411	0.112295	0.072116	NA	NA	NA	NA	NA	NA	NA	NA	NA	NA	NA	NA	NA	NA	NA	NA	NA	NA
216280_s_at	DICER1	0.0238095	0.111111	0.0714286	0.0238095	0.111111	0.0714286	NA	NA	NA	NA	NA	NA	-0.012212	0.018265	-0.006054	NA	NA	NA	NA	NA	NA	NA	NA	NA	NA	NA	NA	NA	NA	NA	NA	NA	NA	-0.021944	0.043855	-0.021911	-0.035659	0.042382	-0.006723	NA	NA	NA	NA	NA	NA
216473_x_at	DUX4	0.0238095	0.111111	0.142857	0.0238095	0.111111	0.142857	NA	NA	NA	NA	NA	NA	NA	NA	NA	NA	NA	NA	-0.034717	0.009443	0.025274	NA	NA	NA	NA	NA	NA	NA	NA	NA	NA	NA	NA	NA	NA	NA	-0.344123	-0.075673	0.419796	NA	NA	NA	-0.051646	-0.011697	0.063343
217033_x_at	NTRK3	-0.309524	-0.111111	-0.928571	-0.309524	-0.111111	-0.928571	-0.28923	0.616736	-0.327506	NA	NA	NA	NA	NA	NA	NA	NA	NA	NA	NA	NA	-0.04864	0.122447	-0.073807	NA	NA	NA	-0.002646	0.095879	-0.093232	NA	NA	NA	NA	NA	NA	NA	NA	NA	NA	NA	NA	NA	NA	NA
217058_at	GNAS	-0.761905	0.111111	-0.285714	-0.761905	0.111111	-0.285714	-0.092811	0.177911	-0.0851	NA	NA	NA	-0.114207	0.137078	-0.022871	-0.090677	0.077485	0.013192	NA	NA	NA	NA	NA	NA	NA	NA	NA	NA	NA	NA	NA	NA	NA	NA	NA	NA	NA	NA	NA	NA	NA	NA	NA	NA	NA
217112_at	PDGFB	0	0.111111	0	0	0.111111	0	NA	NA	NA	-0.00021	0.000944	-0.000734	NA	NA	NA	NA	NA	NA	NA	NA	NA	NA	NA	NA	NA	NA	NA	-0.000251	0.005001	-0.004751	-0.002648	0.008403	-0.005755	NA	NA	NA	NA	NA	NA	NA	NA	NA	NA	NA	NA
217150_s_at	NF2	-0.357143	0	-0.714286	-0.357143	0	-0.714286	-0.229496	0.466445	-0.236949	-0.03923	0.283904	-0.244675	NA	NA	NA	NA	NA	NA	NA	NA	NA	NA	NA	NA	NA	NA	NA	NA	NA	NA	NA	NA	NA	NA	NA	NA	NA	NA	NA	NA	NA	NA	0.012704	0.066905	-0.079609
217377_x_at	NTRK3	-0.428571	0.111111	-0.928571	-0.428571	0.111111	-0.928571	-0.303399	0.75411	-0.45071	NA	NA	NA	NA	NA	NA	0.013111	0.014342	-0.027453	NA	NA	NA	NA	NA	NA	NA	NA	NA	-0.029387	0.12059	-0.091203	NA	NA	NA	NA	NA	NA	NA	NA	NA	NA	NA	NA	NA	NA	NA
217673_x_at	GNAS	-0.285714	0.888889	0.357143	-0.285714	0.888889	0.357143	NA	NA	NA	-0.063383	0.109798	-0.046415	NA	NA	NA	-0.016113	0.031792	-0.015679	NA	NA	NA	NA	NA	NA	NA	NA	NA	NA	NA	NA	NA	NA	NA	NA	NA	NA	-0.22475	0.12622	0.09853	NA	NA	NA	NA	NA	NA
218222_x_at	ARNT	0.0238095	0	0.0714286	0.0238095	0	0.0714286	NA	NA	NA	NA	NA	NA	-0.004065	-0.033619	0.037684	NA	NA	NA	NA	NA	NA	NA	NA	NA	NA	NA	NA	0.031996	-0.382808	0.350812	NA	NA	NA	NA	NA	NA	NA	NA	NA	NA	NA	NA	0.065696	-0.155436	0.08974
218629_at	SMO	-0.119048	0.222222	0.357143	-0.119048	0.222222	0.357143	NA	NA	NA	NA	NA	NA	NA	NA	NA	NA	NA	NA	NA	NA	NA	NA	NA	NA	NA	NA	NA	-0.199279	0.097735	0.101544	NA	NA	NA	NA	NA	NA	-0.258433	-0.218254	0.476687	NA	NA	NA	-0.251448	0.0065	0.244948
219228_at	ZNF331	-0.190476	0.444444	-0.357143	-0.190476	0.444444	-0.357143	NA	NA	NA	-0.004889	0.100941	-0.096052	0.073572	0.084641	-0.158213	NA	NA	NA	NA	NA	NA	NA	NA	NA	0.024147	0.42114	-0.445287	NA	NA	NA	NA	NA	NA	NA	NA	NA	NA	NA	NA	NA	NA	NA	NA	NA	NA
220616_at	ZNF384	0.047619	0.444444	0.0714286	0.047619	0.444444	0.0714286	NA	NA	NA	NA	NA	NA	-0.010921	0.013697	-0.002776	NA	NA	NA	NA	NA	NA	-0.00046	0.000622	-0.000162	NA	NA	NA	NA	NA	NA	NA	NA	NA	NA	NA	NA	NA	NA	NA	NA	NA	NA	-0.013004	0.008295	0.00471
221248_s_at	WHSC1L1	-0.0238095	0.555556	0.142857	-0.0238095	0.555556	0.142857	NA	NA	NA	NA	NA	NA	-0.062833	0.047021	0.015812	NA	NA	NA	NA	NA	NA	-0.089487	0.114497	-0.02501	NA	NA	NA	NA	NA	NA	NA	NA	NA	NA	NA	NA	NA	NA	NA	-0.028969	0.053386	-0.024417	NA	NA	NA
221691_x_at	NPM1	0.380952	-1	-0.357143	0.380952	-1	-0.357143	NA	NA	NA	0.068061	-0.067137	-0.000923	NA	NA	NA	NA	NA	NA	NA	NA	NA	NA	NA	NA	NA	NA	NA	NA	NA	NA	NA	NA	NA	NA	NA	NA	0.541382	-0.321146	-0.220236	0.144962	-0.266612	0.12165	NA	NA	NA
221775_x_at	RPL22	0.261905	-0.111111	-0.428571	0.261905	-0.111111	-0.428571	NA	NA	NA	NA	NA	NA	0.053548	-0.004423	-0.049125	NA	NA	NA	NA	NA	NA	NA	NA	NA	NA	NA	NA	NA	NA	NA	NA	NA	NA	NA	NA	NA	0.170819	0.030202	-0.201021	0.096059	-0.038415	-0.057644	NA	NA	NA
221871_s_at	TFG	-0.571429	0.222222	-0.5	-0.571429	0.222222	-0.5	NA	NA	NA	NA	NA	NA	NA	NA	NA	NA	NA	NA	-0.247751	0.332536	-0.084785	NA	NA	NA	-0.108936	0.056816	0.05212	NA	NA	NA	-0.016588	0.02086	-0.004273	NA	NA	NA	NA	NA	NA	NA	NA	NA	NA	NA	NA
121_at	PAX8	-0.261905	0.666667	0.5	-0.261905	0.666667	0.5	NA	NA	NA	NA	NA	NA	-0.073919	0.09673	-0.022811	NA	NA	NA	-0.246624	0.279365	-0.032741	NA	NA	NA	NA	NA	NA	NA	NA	NA	NA	NA	NA	NA	NA	NA	NA	NA	NA	NA	NA	NA	NA	NA	NA
200914_x_at	KTN1	-0.309524	1	0.285714	-0.309524	1	0.285714	NA	NA	NA	NA	NA	NA	NA	NA	NA	-0.083543	0.082243	0.0013	NA	NA	NA	NA	NA	NA	NA	NA	NA	NA	NA	NA	NA	NA	NA	NA	NA	NA	NA	NA	NA	-0.074646	0.079226	-0.00458	NA	NA	NA
201496_x_at	MYH11	0.0952381	0.222222	-0.642857	0.0952381	0.222222	-0.642857	0.033812	0.68035	-0.714162	NA	NA	NA	NA	NA	NA	NA	NA	NA	NA	NA	NA	NA	NA	NA	-0.009589	0.024423	-0.014833	NA	NA	NA	NA	NA	NA	NA	NA	NA	NA	NA	NA	NA	NA	NA	NA	NA	NA
201731_s_at	TPR	0.333333	-0.555556	0.0714286	0.333333	-0.555556	0.0714286	NA	NA	NA	0.076287	-0.111438	0.035151	0.090879	-0.115474	0.024594	NA	NA	NA	NA	NA	NA	NA	NA	NA	NA	NA	NA	NA	NA	NA	NA	NA	NA	NA	NA	NA	NA	NA	NA	NA	NA	NA	NA	NA	NA
201746_at	TP53	-0.119048	0	0.142857	-0.119048	0	0.142857	NA	NA	NA	NA	NA	NA	NA	NA	NA	NA	NA	NA	NA	NA	NA	NA	NA	NA	NA	NA	NA	NA	NA	NA	NA	NA	NA	-0.038753	0.011336	0.027416	NA	NA	NA	NA	NA	NA	-0.404461	-0.082359	0.48682
201984_s_at	EGFR	0.238095	-0.111111	-0.714286	0.238095	-0.111111	-0.714286	NA	NA	NA	NA	NA	NA	NA	NA	NA	NA	NA	NA	NA	NA	NA	NA	NA	NA	NA	NA	NA	NA	NA	NA	NA	NA	NA	NA	NA	NA	0.790402	0.234684	-1.02509	NA	NA	NA	0.162557	0.061113	-0.223671
202103_at	BRD4	0.0714286	-0.333333	0.214286	0.0714286	-0.333333	0.214286	NA	NA	NA	0.051472	-0.134432	0.082959	NA	NA	NA	NA	NA	NA	NA	NA	NA	NA	NA	NA	NA	NA	NA	-0.209976	-0.360228	0.570205	NA	NA	NA	NA	NA	NA	NA	NA	NA	NA	NA	NA	NA	NA	NA
202160_at	CREBBP	0.142857	0.333333	-0.428571	0.142857	0.333333	-0.428571	NA	NA	NA	NA	NA	NA	NA	NA	NA	-0.036105	0.121105	-0.085	NA	NA	NA	NA	NA	NA	-0.00121	0.070025	-0.068815	NA	NA	NA	NA	NA	NA	NA	NA	NA	NA	NA	NA	NA	NA	NA	NA	NA	NA
202431_s_at	MYC	0.380952	-0.555556	-0.571429	0.380952	-0.555556	-0.571429	NA	NA	NA	0.427384	-0.187893	-0.239491	NA	NA	NA	NA	NA	NA	NA	NA	NA	NA	NA	NA	NA	NA	NA	NA	NA	NA	NA	NA	NA	NA	NA	NA	1.04385	-0.165288	-0.878561	NA	NA	NA	NA	NA	NA
202443_x_at	NOTCH2	-0.047619	-0.555556	0.571429	-0.047619	-0.555556	0.571429	NA	NA	NA	NA	NA	NA	NA	NA	NA	NA	NA	NA	NA	NA	NA	NA	NA	NA	NA	NA	NA	NA	NA	NA	NA	NA	NA	NA	NA	NA	NA	NA	NA	0.048623	-0.265119	0.216495	-0.005766	-0.209358	0.215124
202445_s_at	NOTCH2	-0.404762	-0.555556	0.214286	-0.404762	-0.555556	0.214286	NA	NA	NA	NA	NA	NA	NA	NA	NA	NA	NA	NA	NA	NA	NA	NA	NA	NA	NA	NA	NA	-0.078766	-0.117648	0.196413	NA	NA	NA	-0.044959	-0.045453	0.090412	NA	NA	NA	NA	NA	NA	NA	NA	NA
203032_s_at	FH	-0.0952381	-1	-0.142857	-0.0952381	-1	-0.142857	NA	NA	NA	0.342621	-0.338671	-0.00395	NA	NA	NA	NA	NA	NA	NA	NA	NA	NA	NA	NA	NA	NA	NA	NA	NA	NA	NA	NA	NA	NA	NA	NA	NA	NA	NA	NA	NA	NA	0.308528	-0.564329	0.255801
204095_s_at	ELL	0.0714286	0.333333	0.142857	0.0714286	0.333333	0.142857	NA	NA	NA	NA	NA	NA	-0.007084	0.009858	-0.002774	NA	NA	NA	NA	NA	NA	NA	NA	NA	NA	NA	NA	NA	NA	NA	NA	NA	NA	NA	NA	NA	NA	NA	NA	-0.000168	0.000167	1e-06	NA	NA	NA
204249_s_at	LMO2	0.428571	-0.666667	-0.571429	0.428571	-0.666667	-0.571429	NA	NA	NA	NA	NA	NA	NA	NA	NA	NA	NA	NA	NA	NA	NA	NA	NA	NA	0.467799	-0.447204	-0.020595	NA	NA	NA	NA	NA	NA	0.397571	-0.311535	-0.086035	NA	NA	NA	NA	NA	NA	NA	NA	NA
204380_s_at	FGFR3	0	0.111111	0.142857	0	0.111111	0.142857	NA	NA	NA	NA	NA	NA	-0.025757	-0.010952	0.036709	NA	NA	NA	NA	NA	NA	NA	NA	NA	NA	NA	NA	NA	NA	NA	NA	NA	NA	NA	NA	NA	-0.082504	-0.012699	0.095203	NA	NA	NA	NA	NA	NA
204531_s_at	BRCA1	-0.119048	0.333333	0.285714	-0.119048	0.333333	0.285714	NA	NA	NA	-0.041342	0.077352	-0.036011	NA	NA	NA	NA	NA	NA	-0.128403	0.173238	-0.044835	NA	NA	NA	NA	NA	NA	NA	NA	NA	NA	NA	NA	NA	NA	NA	NA	NA	NA	NA	NA	NA	NA	NA	NA
204562_at	IRF4	-0.333333	0.222222	-0.0714286	-0.333333	0.222222	-0.0714286	NA	NA	NA	NA	NA	NA	NA	NA	NA	NA	NA	NA	NA	NA	NA	NA	NA	NA	NA	NA	NA	NA	NA	NA	NA	NA	NA	-0.056254	0.088036	-0.031782	NA	NA	NA	-0.010313	0.018488	-0.008175	NA	NA	NA
204754_at	HLF	0.309524	-0.777778	-0.214286	0.309524	-0.777778	-0.214286	NA	NA	NA	NA	NA	NA	NA	NA	NA	NA	NA	NA	NA	NA	NA	NA	NA	NA	NA	NA	NA	NA	NA	NA	0.023937	-0.031079	0.007142	NA	NA	NA	0.388651	-0.472099	0.083449	NA	NA	NA	NA	NA	NA
204991_s_at	NF2	0.047619	0.111111	0.0714286	0.047619	0.111111	0.0714286	NA	NA	NA	NA	NA	NA	NA	NA	NA	NA	NA	NA	NA	NA	NA	NA	NA	NA	NA	NA	NA	NA	NA	NA	NA	NA	NA	NA	NA	NA	-0.079482	0.060632	0.018849	NA	NA	NA	-0.032217	0.039845	-0.007628
205051_s_at	KIT	-0.0238095	-0.444444	-0.214286	-0.0238095	-0.444444	-0.214286	NA	NA	NA	NA	NA	NA	NA	NA	NA	NA	NA	NA	NA	NA	NA	NA	NA	NA	NA	NA	NA	NA	NA	NA	NA	NA	NA	0.08504	-0.063215	-0.021825	NA	NA	NA	0.199341	-0.140562	-0.058779	NA	NA	NA
205189_s_at	FANCC	-0.190476	0.555556	-0.357143	-0.190476	0.555556	-0.357143	NA	NA	NA	-0.102143	0.333475	-0.231333	NA	NA	NA	NA	NA	NA	-0.006781	0.053604	-0.046823	NA	NA	NA	NA	NA	NA	NA	NA	NA	NA	NA	NA	NA	NA	NA	NA	NA	NA	NA	NA	NA	NA	NA	NA
205386_s_at	MDM2	0.0952381	0	0.142857	0.0952381	0	0.142857	NA	NA	NA	NA	NA	NA	NA	NA	NA	NA	NA	NA	NA	NA	NA	NA	NA	NA	NA	NA	NA	-0.008398	-0.11061	0.119008	-0.007078	-0.046892	0.05397	NA	NA	NA	NA	NA	NA	NA	NA	NA	NA	NA	NA
205425_at	HIP1	0.285714	-0.111111	-0.714286	0.285714	-0.111111	-0.714286	NA	NA	NA	NA	NA	NA	NA	NA	NA	0.217992	-0.012252	-0.205741	NA	NA	NA	NA	NA	NA	NA	NA	NA	NA	NA	NA	NA	NA	NA	NA	NA	NA	0.340951	-0.065402	-0.275549	NA	NA	NA	NA	NA	NA
205585_at	ETV6	-0.309524	-0.222222	0.285714	-0.309524	-0.222222	0.285714	NA	NA	NA	NA	NA	NA	NA	NA	NA	NA	NA	NA	-0.648369	0.173345	0.475024	NA	NA	NA	-0.191675	0.077459	0.114216	NA	NA	NA	NA	NA	NA	NA	NA	NA	NA	NA	NA	NA	NA	NA	NA	NA	NA
205588_s_at	FGFR1OP	0.357143	-0.444444	-0.642857	0.357143	-0.444444	-0.642857	NA	NA	NA	0.233961	-0.081788	-0.152172	NA	NA	NA	NA	NA	NA	NA	NA	NA	NA	NA	NA	NA	NA	NA	NA	NA	NA	NA	NA	NA	NA	NA	NA	0.706091	-0.249064	-0.457027	NA	NA	NA	NA	NA	NA
205876_at	LIFR	-0.166667	-0.444444	-0.642857	-0.166667	-0.444444	-0.642857	NA	NA	NA	NA	NA	NA	NA	NA	NA	NA	NA	NA	0.913567	-0.356186	-0.557382	NA	NA	NA	NA	NA	NA	NA	NA	NA	0.072512	-0.025853	-0.046659	NA	NA	NA	NA	NA	NA	NA	NA	NA	NA	NA	NA
206036_s_at	REL	-0.0952381	-0.444444	0.0714286	-0.0952381	-0.444444	0.0714286	NA	NA	NA	NA	NA	NA	NA	NA	NA	NA	NA	NA	NA	NA	NA	NA	NA	NA	NA	NA	NA	NA	NA	NA	NA	NA	NA	0.033942	-0.19109	0.157148	NA	NA	NA	NA	NA	NA	0.054789	-0.273504	0.218715
206718_at	LMO1	0.0238095	0.222222	0	0.0238095	0.222222	0	-0.030245	0.06049	-0.030245	NA	NA	NA	NA	NA	NA	NA	NA	NA	NA	NA	NA	NA	NA	NA	-0.005281	0.047488	-0.042207	NA	NA	NA	NA	NA	NA	NA	NA	NA	NA	NA	NA	NA	NA	NA	NA	NA	NA
206919_at	ELK4	0.142857	0.333333	0.0714286	0.142857	0.333333	0.0714286	-0.015911	0.03889	-0.022979	NA	NA	NA	NA	NA	NA	NA	NA	NA	NA	NA	NA	NA	NA	NA	NA	NA	NA	NA	NA	NA	NA	NA	NA	NA	NA	NA	NA	NA	NA	-5.1e-05	0.010521	-0.01047	NA	NA	NA
206951_at	HIST1H4E	0.0952381	0.444444	0.142857	0.0952381	0.444444	0.142857	NA	NA	NA	NA	NA	NA	-0.029642	0.020615	0.009027	NA	NA	NA	NA	NA	NA	NA	NA	NA	NA	NA	NA	NA	NA	NA	NA	NA	NA	NA	NA	NA	NA	NA	NA	-0.038638	0.021139	0.017499	NA	NA	NA
207233_s_at	MITF	-0.214286	-0.444444	0.357143	-0.214286	-0.444444	0.357143	NA	NA	NA	NA	NA	NA	NA	NA	NA	NA	NA	NA	NA	NA	NA	NA	NA	NA	-0.07248	-0.105722	0.178202	NA	NA	NA	NA	NA	NA	NA	NA	NA	-0.072455	-0.082425	0.15488	NA	NA	NA	NA	NA	NA
207398_at	HOXD13	1	1	1	1	1	1	0	0	0	NA	NA	NA	NA	NA	NA	NA	NA	NA	0	0	0	NA	NA	NA	NA	NA	NA	NA	NA	NA	NA	NA	NA	NA	NA	NA	NA	NA	NA	NA	NA	NA	NA	NA	NA
207550_at	MPL	0.119048	0	0.214286	0.119048	0	0.214286	NA	NA	NA	NA	NA	NA	NA	NA	NA	NA	NA	NA	NA	NA	NA	NA	NA	NA	0.149149	-0.388114	0.238965	NA	NA	NA	0.00152	-0.003176	0.001656	NA	NA	NA	NA	NA	NA	NA	NA	NA	NA	NA	NA
207870_at	AKAP9	0	0	0.142857	0	0	0.142857	NA	NA	NA	NA	NA	NA	NA	NA	NA	0.000758	-0.002218	0.001461	NA	NA	NA	NA	NA	NA	NA	NA	NA	NA	NA	NA	NA	NA	NA	NA	NA	NA	NA	NA	NA	NA	NA	NA	0.001315	-0.006976	0.005661
207924_x_at	PAX8	-0.261905	0.111111	0.5	-0.261905	0.111111	0.5	NA	NA	NA	NA	NA	NA	NA	NA	NA	NA	NA	NA	NA	NA	NA	NA	NA	NA	NA	NA	NA	NA	NA	NA	NA	NA	NA	-0.465519	-0.315513	0.781032	-0.395268	-0.327885	0.723154	NA	NA	NA	NA	NA	NA
208180_s_at	HIST1H4H	-0.0952381	-0.777778	-0.785714	-0.0952381	-0.777778	-0.785714	0.138265	0.056365	-0.19463	0.175552	-0.053913	-0.121639	NA	NA	NA	NA	NA	NA	NA	NA	NA	NA	NA	NA	NA	NA	NA	NA	NA	NA	NA	NA	NA	NA	NA	NA	NA	NA	NA	NA	NA	NA	NA	NA	NA
208229_at	FGFR2	-0.261905	-0.888889	-0.428571	-0.261905	-0.888889	-0.428571	NA	NA	NA	NA	NA	NA	NA	NA	NA	NA	NA	NA	NA	NA	NA	NA	NA	NA	NA	NA	NA	NA	NA	NA	NA	NA	NA	NA	NA	NA	0.180373	-0.314821	0.134448	NA	NA	NA	0.166346	-0.11377	-0.052575
208510_s_at	PPARG	0.0714286	-0.555556	0.214286	0.0714286	-0.555556	0.214286	NA	NA	NA	NA	NA	NA	NA	NA	NA	NA	NA	NA	0.227824	-1.04703	0.81921	NA	NA	NA	NA	NA	NA	NA	NA	NA	NA	NA	NA	0.070682	-0.276053	0.205372	NA	NA	NA	NA	NA	NA	NA	NA	NA
208605_s_at	NTRK1	0.047619	0.333333	0	0.047619	0.333333	0	NA	NA	NA	NA	NA	NA	NA	NA	NA	NA	NA	NA	NA	NA	NA	NA	NA	NA	-0.003169	0.011492	-0.008323	NA	NA	NA	-0.001647	0.004159	-0.002511	NA	NA	NA	NA	NA	NA	NA	NA	NA	NA	NA	NA
208698_s_at	NONO	0.261905	-1	0.0714286	0.261905	-1	0.0714286	NA	NA	NA	NA	NA	NA	NA	NA	NA	NA	NA	NA	NA	NA	NA	NA	NA	NA	NA	NA	NA	NA	NA	NA	NA	NA	NA	NA	NA	NA	0.33313	-0.382116	0.048986	0.331535	-0.56751	0.235974	NA	NA	NA
208711_s_at	CCND1	0.404762	0.666667	-0.928571	0.404762	0.666667	-0.928571	NA	NA	NA	0.008191	0.068873	-0.077063	NA	NA	NA	NA	NA	NA	NA	NA	NA	NA	NA	NA	NA	NA	NA	NA	NA	NA	NA	NA	NA	0.074786	0.083833	-0.158619	NA	NA	NA	NA	NA	NA	NA	NA	NA
208900_s_at	TOP1	-0.357143	1	0.0714286	-0.357143	1	0.0714286	NA	NA	NA	NA	NA	NA	-0.496373	0.280681	0.215692	NA	NA	NA	NA	NA	NA	-0.3735	0.43108	-0.05758	NA	NA	NA	NA	NA	NA	NA	NA	NA	NA	NA	NA	NA	NA	NA	NA	NA	NA	NA	NA	NA
209153_s_at	TCF3	-0.380952	1	0.214286	-0.380952	1	0.214286	NA	NA	NA	NA	NA	NA	NA	NA	NA	NA	NA	NA	-0.459572	0.26403	0.195541	NA	NA	NA	NA	NA	NA	NA	NA	NA	NA	NA	NA	NA	NA	NA	-0.104102	0.148434	-0.044332	NA	NA	NA	NA	NA	NA
209269_s_at	SYK	-0.452381	-0.444444	-0.142857	-0.452381	-0.444444	-0.142857	NA	NA	NA	NA	NA	NA	NA	NA	NA	NA	NA	NA	NA	NA	NA	NA	NA	NA	NA	NA	NA	NA	NA	NA	-0.105537	0.018754	0.086783	-0.161732	-0.047535	0.209267	NA	NA	NA	NA	NA	NA	NA	NA	NA
209347_s_at	MAF	-0.142857	-0.555556	-0.642857	-0.142857	-0.555556	-0.642857	NA	NA	NA	NA	NA	NA	NA	NA	NA	0.068629	-0.016503	-0.052126	NA	NA	NA	NA	NA	NA	NA	NA	NA	NA	NA	NA	NA	NA	NA	NA	NA	NA	NA	NA	NA	NA	NA	NA	0.112614	0.090089	-0.202703
209360_s_at	RUNX1	-0.0952381	-0.222222	0	-0.0952381	-0.222222	0	0.103458	-0.227159	0.123701	NA	NA	NA	NA	NA	NA	NA	NA	NA	NA	NA	NA	NA	NA	NA	0.166346	-0.585969	0.419623	NA	NA	NA	NA	NA	NA	NA	NA	NA	NA	NA	NA	NA	NA	NA	NA	NA	NA
209603_at	GATA3	0.0238095	0.222222	0.285714	0.0238095	0.222222	0.285714	NA	NA	NA	NA	NA	NA	NA	NA	NA	NA	NA	NA	NA	NA	NA	NA	NA	NA	NA	NA	NA	-0.059788	0.010241	0.049548	NA	NA	NA	NA	NA	NA	-0.657098	0.292406	0.364693	NA	NA	NA	NA	NA	NA
209604_s_at	GATA3	-0.309524	0.555556	-0.428571	-0.309524	0.555556	-0.428571	NA	NA	NA	NA	NA	NA	NA	NA	NA	NA	NA	NA	0.059272	0.46332	-0.522592	NA	NA	NA	NA	NA	NA	NA	NA	NA	NA	NA	NA	0.036288	0.258495	-0.294783	NA	NA	NA	NA	NA	NA	NA	NA	NA
209710_at	GATA2	0.142857	0.333333	-0.5	0.142857	0.333333	-0.5	NA	NA	NA	NA	NA	NA	NA	NA	NA	0.042946	0.104573	-0.147519	NA	NA	NA	NA	NA	NA	NA	NA	NA	0.104846	0.105202	-0.210049	NA	NA	NA	NA	NA	NA	NA	NA	NA	NA	NA	NA	NA	NA	NA
209757_s_at	MYCN	0.166667	0	0	0.166667	0	0	NA	NA	NA	NA	NA	NA	NA	NA	NA	NA	NA	NA	0.537501	0.504162	-1.04166	0.043707	0.013488	-0.057195	NA	NA	NA	NA	NA	NA	NA	NA	NA	NA	NA	NA	NA	NA	NA	NA	NA	NA	NA	NA	NA
209954_x_at	SS18	-0.166667	0	-0.285714	-0.166667	0	-0.285714	0.022655	0.089596	-0.112251	NA	NA	NA	NA	NA	NA	NA	NA	NA	NA	NA	NA	0.008631	0.163806	-0.172437	NA	NA	NA	NA	NA	NA	NA	NA	NA	NA	NA	NA	NA	NA	NA	NA	NA	NA	NA	NA	NA
209995_s_at	TCL1A	0	0.111111	0.142857	0	0.111111	0.142857	NA	NA	NA	NA	NA	NA	NA	NA	NA	NA	NA	NA	NA	NA	NA	NA	NA	NA	NA	NA	NA	NA	NA	NA	-0.728766	-0.190567	0.919333	NA	NA	NA	-0.019997	0.007234	0.012763	NA	NA	NA	NA	NA	NA
210045_at	IDH2	-0.119048	0.666667	-0.285714	-0.119048	0.666667	-0.285714	NA	NA	NA	NA	NA	NA	NA	NA	NA	NA	NA	NA	0.428569	0.51216	-0.940728	NA	NA	NA	NA	NA	NA	NA	NA	NA	NA	NA	NA	NA	NA	NA	NA	NA	NA	NA	NA	NA	0.064611	0.211268	-0.275878
210231_x_at	SET	-0.0952381	-0.111111	0.5	-0.0952381	-0.111111	0.5	NA	NA	NA	NA	NA	NA	NA	NA	NA	-0.030222	-0.100332	0.130554	NA	NA	NA	NA	NA	NA	NA	NA	NA	NA	NA	NA	NA	NA	NA	-0.088222	-0.113131	0.201353	NA	NA	NA	NA	NA	NA	NA	NA	NA
210249_s_at	NCOA1	0.166667	0.333333	-0.0714286	0.166667	0.333333	-0.0714286	NA	NA	NA	NA	NA	NA	NA	NA	NA	0.010281	0.140444	-0.150725	NA	NA	NA	NA	NA	NA	NA	NA	NA	NA	NA	NA	NA	NA	NA	NA	NA	NA	NA	NA	NA	NA	NA	NA	0.146413	0.227731	-0.374144
210470_x_at	NONO	0.238095	-1	0.142857	0.238095	-1	0.142857	NA	NA	NA	NA	NA	NA	NA	NA	NA	NA	NA	NA	NA	NA	NA	NA	NA	NA	NA	NA	NA	NA	NA	NA	NA	NA	NA	NA	NA	NA	0.269219	-0.286869	0.01765	0.267223	-0.497963	0.23074	NA	NA	NA
210776_x_at	TCF3	-0.309524	0.666667	-0.0714286	-0.309524	0.666667	-0.0714286	NA	NA	NA	NA	NA	NA	-0.060845	0.08173	-0.020886	-0.146733	0.094838	0.051895	NA	NA	NA	NA	NA	NA	NA	NA	NA	NA	NA	NA	NA	NA	NA	NA	NA	NA	NA	NA	NA	NA	NA	NA	NA	NA	NA
210973_s_at	FGFR1	0.119048	-0.555556	0.142857	0.119048	-0.555556	0.142857	NA	NA	NA	NA	NA	NA	NA	NA	NA	NA	NA	NA	NA	NA	NA	NA	NA	NA	NA	NA	NA	0.004967	-0.321447	0.31648	NA	NA	NA	NA	NA	NA	NA	NA	NA	NA	NA	NA	0.072659	-0.168513	0.095854
211091_s_at	NF2	-0.47619	0.222222	-0.214286	-0.47619	0.222222	-0.214286	NA	NA	NA	NA	NA	NA	NA	NA	NA	NA	NA	NA	NA	NA	NA	-0.021394	0.020679	0.000714	NA	NA	NA	NA	NA	NA	-0.021166	0.03611	-0.014944	NA	NA	NA	NA	NA	NA	NA	NA	NA	NA	NA	NA
211401_s_at	FGFR2	0.166667	0.111111	0.142857	0.166667	0.111111	0.142857	NA	NA	NA	NA	NA	NA	NA	NA	NA	NA	NA	NA	NA	NA	NA	NA	NA	NA	NA	NA	NA	NA	NA	NA	0.017319	-0.023412	0.006094	NA	NA	NA	NA	NA	NA	0.153922	-0.306752	0.15283	NA	NA	NA
211421_s_at	RET	0.0952381	0.222222	0.0714286	0.0952381	0.222222	0.0714286	NA	NA	NA	NA	NA	NA	NA	NA	NA	-0.001066	0.01782	-0.016755	NA	NA	NA	NA	NA	NA	NA	NA	NA	NA	NA	NA	NA	NA	NA	NA	NA	NA	NA	NA	NA	NA	NA	NA	-0.066471	0.208717	-0.142246
211689_s_at	TMPRSS2	0	0.111111	0.142857	0	0.111111	0.142857	NA	NA	NA	-0.002717	-0.001438	0.004155	NA	NA	NA	NA	NA	NA	NA	NA	NA	NA	NA	NA	NA	NA	NA	NA	NA	NA	NA	NA	NA	NA	NA	NA	-0.85795	0.047213	0.810737	NA	NA	NA	NA	NA	NA
211851_x_at	BRCA1	0.0238095	0.555556	0.214286	0.0238095	0.555556	0.214286	-0.034004	0.037686	-0.003682	NA	NA	NA	NA	NA	NA	NA	NA	NA	NA	NA	NA	NA	NA	NA	NA	NA	NA	NA	NA	NA	NA	NA	NA	NA	NA	NA	-0.0381	0.044711	-0.006611	NA	NA	NA	NA	NA	NA
212116_at	TRIM27	-0.119048	-0.111111	0.428571	-0.119048	-0.111111	0.428571	NA	NA	NA	NA	NA	NA	NA	NA	NA	NA	NA	NA	NA	NA	NA	NA	NA	NA	NA	NA	NA	NA	NA	NA	-0.087598	-0.073557	0.161156	NA	NA	NA	NA	NA	NA	NA	NA	NA	-0.332564	-0.229897	0.562462
212392_s_at	PDE4DIP	-0.285714	0.555556	-0.142857	-0.285714	0.555556	-0.142857	NA	NA	NA	NA	NA	NA	NA	NA	NA	NA	NA	NA	NA	NA	NA	NA	NA	NA	-0.096877	0.084627	0.01225	NA	NA	NA	NA	NA	NA	NA	NA	NA	NA	NA	NA	-0.000987	0.001578	-0.000591	NA	NA	NA
212435_at	TRIM33	0.0952381	0.111111	0.357143	0.0952381	0.111111	0.357143	NA	NA	NA	NA	NA	NA	NA	NA	NA	NA	NA	NA	NA	NA	NA	NA	NA	NA	-0.115067	-0.085704	0.200771	NA	NA	NA	-0.046829	-0.042497	0.089326	NA	NA	NA	NA	NA	NA	NA	NA	NA	NA	NA	NA
213388_at	PDE4DIP	0.0952381	-0.777778	0.142857	0.0952381	-0.777778	0.142857	NA	NA	NA	NA	NA	NA	NA	NA	NA	NA	NA	NA	NA	NA	NA	NA	NA	NA	0.016139	-0.579711	0.563572	NA	NA	NA	NA	NA	NA	NA	NA	NA	NA	NA	NA	0.001955	-0.048878	0.046923	NA	NA	NA
213730_x_at	TCF3	-0.214286	0.555556	0.0714286	-0.214286	0.555556	0.0714286	NA	NA	NA	NA	NA	NA	-0.103946	0.097725	0.006221	NA	NA	NA	NA	NA	NA	NA	NA	NA	NA	NA	NA	NA	NA	NA	NA	NA	NA	NA	NA	NA	-0.095141	0.133784	-0.038642	NA	NA	NA	NA	NA	NA
213732_at	TCF3	0	0.333333	0	0	0.333333	0	NA	NA	NA	NA	NA	NA	NA	NA	NA	NA	NA	NA	NA	NA	NA	NA	NA	NA	NA	NA	NA	-0.013792	0.056304	-0.042513	NA	NA	NA	-0.024892	0.056844	-0.031952	NA	NA	NA	NA	NA	NA	NA	NA	NA
213940_s_at	FNBP1	-0.261905	0.888889	-0.142857	-0.261905	0.888889	-0.142857	NA	NA	NA	NA	NA	NA	NA	NA	NA	NA	NA	NA	NA	NA	NA	NA	NA	NA	NA	NA	NA	NA	NA	NA	NA	NA	NA	-0.163135	0.178312	-0.015177	NA	NA	NA	-0.141882	0.174784	-0.032902	NA	NA	NA
213960_at	NTRK3	-0.166667	-0.888889	-1	-0.166667	-0.888889	-1	NA	NA	NA	NA	NA	NA	NA	NA	NA	0.033738	-0.016252	-0.017485	NA	NA	NA	NA	NA	NA	NA	NA	NA	NA	NA	NA	NA	NA	NA	NA	NA	NA	0.1177	0.000692	-0.118392	NA	NA	NA	NA	NA	NA
214099_s_at	PDE4DIP	-0.166667	0.444444	0	-0.166667	0.444444	0	NA	NA	NA	-0.502738	0.323091	0.179647	NA	NA	NA	NA	NA	NA	NA	NA	NA	NA	NA	NA	NA	NA	NA	-0.053898	0.042998	0.0109	NA	NA	NA	NA	NA	NA	NA	NA	NA	NA	NA	NA	NA	NA	NA
214124_x_at	FGFR1OP	0.261905	0.333333	-0.714286	0.261905	0.333333	-0.714286	-0.153553	0.346682	-0.193129	NA	NA	NA	-0.050522	0.167379	-0.116857	NA	NA	NA	NA	NA	NA	NA	NA	NA	NA	NA	NA	NA	NA	NA	NA	NA	NA	NA	NA	NA	NA	NA	NA	NA	NA	NA	NA	NA	NA
214365_at	TPM3	0	0.222222	0.0714286	0	0.222222	0.0714286	NA	NA	NA	NA	NA	NA	-0.003617	0.006619	-0.003002	NA	NA	NA	NA	NA	NA	NA	NA	NA	NA	NA	NA	NA	NA	NA	NA	NA	NA	-0.020471	0.037966	-0.017495	NA	NA	NA	NA	NA	NA	NA	NA	NA
214516_at	HIST1H4B	0.0714286	0.222222	0.0714286	0.0714286	0.222222	0.0714286	NA	NA	NA	-0.00021	0.000944	-0.000734	NA	NA	NA	NA	NA	NA	NA	NA	NA	NA	NA	NA	NA	NA	NA	NA	NA	NA	NA	NA	NA	-0.005599	0.015993	-0.010394	NA	NA	NA	NA	NA	NA	NA	NA	NA
214548_x_at	GNAS	-0.047619	0	0.357143	-0.047619	0	0.357143	NA	NA	NA	NA	NA	NA	NA	NA	NA	NA	NA	NA	NA	NA	NA	NA	NA	NA	-0.15381	-0.021321	0.175131	NA	NA	NA	NA	NA	NA	NA	NA	NA	NA	NA	NA	NA	NA	NA	-0.026798	0.009527	0.017271
214562_at	HIST1H4L	0.047619	0	0	0.047619	0	0	NA	NA	NA	NA	NA	NA	NA	NA	NA	NA	NA	NA	NA	NA	NA	7.2e-05	-3.6e-05	-3.6e-05	NA	NA	NA	NA	NA	NA	NA	NA	NA	0.004531	0.002294	-0.006826	NA	NA	NA	NA	NA	NA	NA	NA	NA
216055_at	PDGFB	0	0.333333	0.0714286	0	0.333333	0.0714286	NA	NA	NA	NA	NA	NA	-0.00609	0.007933	-0.001843	NA	NA	NA	NA	NA	NA	NA	NA	NA	NA	NA	NA	NA	NA	NA	NA	NA	NA	NA	NA	NA	-0.019075	0.013101	0.005973	NA	NA	NA	NA	NA	NA
216241_s_at	TCEA1	0.404762	-0.888889	0.214286	0.404762	-0.888889	0.214286	NA	NA	NA	0.077777	-0.085973	0.008195	NA	NA	NA	NA	NA	NA	NA	NA	NA	NA	NA	NA	NA	NA	NA	NA	NA	NA	NA	NA	NA	NA	NA	NA	0.225228	-0.315755	0.090528	NA	NA	NA	NA	NA	NA
216260_at	DICER1	0.0714286	0.333333	0	0.0714286	0.333333	0	NA	NA	NA	NA	NA	NA	NA	NA	NA	NA	NA	NA	NA	NA	NA	NA	NA	NA	0.042619	0.093137	-0.135755	NA	NA	NA	NA	NA	NA	-0.005744	0.033096	-0.027353	NA	NA	NA	NA	NA	NA	NA	NA	NA
216471_x_at	SSX2	0.0238095	0.333333	0.0714286	0.0238095	0.333333	0.0714286	NA	NA	NA	-0.081722	0.157715	-0.075993	NA	NA	NA	NA	NA	NA	-0.892357	1.05829	-0.165929	NA	NA	NA	NA	NA	NA	NA	NA	NA	NA	NA	NA	NA	NA	NA	NA	NA	NA	NA	NA	NA	NA	NA	NA
216506_x_at	MLLT10	0.0714286	0.222222	0.142857	0.0714286	0.222222	0.142857	NA	NA	NA	NA	NA	NA	-0.135892	0.097757	0.038134	NA	NA	NA	NA	NA	NA	-0.021118	0.0323	-0.011182	NA	NA	NA	NA	NA	NA	NA	NA	NA	NA	NA	NA	NA	NA	NA	NA	NA	NA	NA	NA	NA
216825_s_at	MPL	0	0.222222	0.0714286	0	0.222222	0.0714286	NA	NA	NA	NA	NA	NA	-0.003496	0.003465	3e-05	NA	NA	NA	NA	NA	NA	NA	NA	NA	NA	NA	NA	NA	NA	NA	NA	NA	NA	NA	NA	NA	-0.035895	0.044757	-0.008862	NA	NA	NA	NA	NA	NA
217053_x_at	ETV1	0.0238095	0.222222	0.142857	0.0238095	0.222222	0.142857	-0.016314	0.009561	0.006753	NA	NA	NA	-0.04129	0.043333	-0.002042	NA	NA	NA	NA	NA	NA	NA	NA	NA	NA	NA	NA	NA	NA	NA	NA	NA	NA	NA	NA	NA	NA	NA	NA	NA	NA	NA	NA	NA	NA
217430_x_at	COL1A1	-0.0952381	-0.555556	-0.285714	-0.0952381	-0.555556	-0.285714	NA	NA	NA	NA	NA	NA	NA	NA	NA	NA	NA	NA	NA	NA	NA	0.751723	-0.449805	-0.301918	NA	NA	NA	0.440102	-0.249157	-0.190945	NA	NA	NA	NA	NA	NA	NA	NA	NA	NA	NA	NA	NA	NA	NA
217457_s_at	RAP1GDS1	0.238095	-0.666667	-0.142857	0.238095	-0.666667	-0.142857	NA	NA	NA	NA	NA	NA	NA	NA	NA	NA	NA	NA	NA	NA	NA	NA	NA	NA	NA	NA	NA	NA	NA	NA	NA	NA	NA	NA	NA	NA	0.205943	-0.311682	0.105739	0.183026	-0.293375	0.110348	NA	NA	NA
217542_at	MDM2	-0.0952381	0.111111	0.214286	-0.0952381	0.111111	0.214286	NA	NA	NA	NA	NA	NA	-0.036924	-0.015708	0.052632	NA	NA	NA	NA	NA	NA	NA	NA	NA	NA	NA	NA	-0.054094	-0.001026	0.05512	NA	NA	NA	NA	NA	NA	NA	NA	NA	NA	NA	NA	NA	NA	NA
218751_s_at	FBXW7	-0.285714	1	-0.0714286	-0.285714	1	-0.0714286	NA	NA	NA	-0.567083	0.672694	-0.105611	NA	NA	NA	-0.097194	0.155761	-0.058568	NA	NA	NA	NA	NA	NA	NA	NA	NA	NA	NA	NA	NA	NA	NA	NA	NA	NA	NA	NA	NA	NA	NA	NA	NA	NA	NA
218915_at	NF2	-0.333333	0.444444	0.285714	-0.333333	0.444444	0.285714	NA	NA	NA	NA	NA	NA	NA	NA	NA	NA	NA	NA	NA	NA	NA	-0.111158	0.074258	0.0369	NA	NA	NA	NA	NA	NA	NA	NA	NA	NA	NA	NA	NA	NA	NA	NA	NA	NA	-0.046505	0.071543	-0.025038
219832_s_at	HOXC13	0.0238095	0	0.0714286	0.0238095	0	0.0714286	NA	NA	NA	NA	NA	NA	NA	NA	NA	NA	NA	NA	NA	NA	NA	NA	NA	NA	NA	NA	NA	-0.045898	-0.102575	0.148473	NA	NA	NA	NA	NA	NA	NA	NA	NA	NA	NA	NA	-0.114325	-0.205762	0.320087
220928_s_at	PRDM16	0.0238095	0	0	0.0238095	0	0	NA	NA	NA	NA	NA	NA	NA	NA	NA	NA	NA	NA	NA	NA	NA	0.000172	-8.6e-05	-8.6e-05	NA	NA	NA	NA	NA	NA	0.001079	-0.000518	-0.000561	NA	NA	NA	NA	NA	NA	NA	NA	NA	NA	NA	NA
220946_s_at	SETD2	-0.238095	0.666667	0	-0.238095	0.666667	0	NA	NA	NA	NA	NA	NA	-0.193212	0.183397	0.009815	NA	NA	NA	NA	NA	NA	NA	NA	NA	-0.279072	0.23065	0.048423	NA	NA	NA	NA	NA	NA	NA	NA	NA	NA	NA	NA	NA	NA	NA	NA	NA	NA
220960_x_at	RPL22	0.261905	-0.444444	-0.285714	0.261905	-0.444444	-0.285714	NA	NA	NA	NA	NA	NA	0.077374	-0.070764	-0.00661	NA	NA	NA	0.032739	-0.037703	0.004964	NA	NA	NA	NA	NA	NA	NA	NA	NA	NA	NA	NA	NA	NA	NA	NA	NA	NA	NA	NA	NA	NA	NA	NA
221703_at	BRIP1	0.0952381	0.222222	0.0714286	0.0952381	0.222222	0.0714286	NA	NA	NA	-0.013941	0.053812	-0.039871	NA	NA	NA	NA	NA	NA	NA	NA	NA	-0.00287	0.007241	-0.004371	NA	NA	NA	NA	NA	NA	NA	NA	NA	NA	NA	NA	NA	NA	NA	NA	NA	NA	NA	NA	NA
221866_at	TFEB	-0.238095	0.444444	-0.214286	-0.238095	0.444444	-0.214286	NA	NA	NA	-0.057521	0.085291	-0.02777	NA	NA	NA	NA	NA	NA	NA	NA	NA	NA	NA	NA	NA	NA	NA	NA	NA	NA	NA	NA	NA	-0.119481	0.151794	-0.032313	NA	NA	NA	NA	NA	NA	NA	NA	NA
221910_at	ETV1	0.0238095	0.222222	0.0714286	0.0238095	0.222222	0.0714286	NA	NA	NA	NA	NA	NA	-0.014017	0.020987	-0.00697	NA	NA	NA	NA	NA	NA	NA	NA	NA	NA	NA	NA	NA	NA	NA	-0.008603	0.005051	0.003553	NA	NA	NA	NA	NA	NA	NA	NA	NA	NA	NA	NA
200959_at	FUS	0.238095	0.111111	-0.428571	0.238095	0.111111	-0.428571	NA	NA	NA	NA	NA	NA	NA	NA	NA	NA	NA	NA	NA	NA	NA	NA	NA	NA	NA	NA	NA	NA	NA	NA	NA	NA	NA	NA	NA	NA	0.28795	0.065344	-0.353295	NA	NA	NA	NA	NA	NA
201983_s_at	EGFR	0.166667	0.555556	-0.857143	0.166667	0.555556	-0.857143	NA	NA	NA	NA	NA	NA	NA	NA	NA	NA	NA	NA	NA	NA	NA	NA	NA	NA	0.002026	0.007109	-0.009135	NA	NA	NA	NA	NA	NA	NA	NA	NA	NA	NA	NA	NA	NA	NA	NA	NA	NA
201995_at	EXT1	-0.238095	0.444444	0.428571	-0.238095	0.444444	0.428571	NA	NA	NA	NA	NA	NA	NA	NA	NA	NA	NA	NA	NA	NA	NA	NA	NA	NA	NA	NA	NA	NA	NA	NA	NA	NA	NA	-0.078458	0.056672	0.021786	NA	NA	NA	NA	NA	NA	NA	NA	NA
202123_s_at	ABL1	-0.119048	0.666667	-0.285714	-0.119048	0.666667	-0.285714	NA	NA	NA	NA	NA	NA	NA	NA	NA	-0.000792	0.083425	-0.082634	NA	NA	NA	NA	NA	NA	NA	NA	NA	NA	NA	NA	NA	NA	NA	NA	NA	NA	NA	NA	NA	NA	NA	NA	NA	NA	NA
202414_at	ERCC5	-0.0714286	0.777778	-0.642857	-0.0714286	0.777778	-0.642857	NA	NA	NA	NA	NA	NA	NA	NA	NA	NA	NA	NA	NA	NA	NA	NA	NA	NA	NA	NA	NA	NA	NA	NA	0.014782	0.050665	-0.065447	NA	NA	NA	NA	NA	NA	NA	NA	NA	NA	NA	NA
203131_at	PDGFRA	-0.047619	-0.444444	-0.0714286	-0.047619	-0.444444	-0.0714286	NA	NA	NA	NA	NA	NA	NA	NA	NA	NA	NA	NA	NA	NA	NA	NA	NA	NA	NA	NA	NA	0.857456	-0.455107	-0.402349	NA	NA	NA	NA	NA	NA	NA	NA	NA	NA	NA	NA	NA	NA	NA
203592_s_at	FSTL3	0.0952381	0.111111	-0.428571	0.0952381	0.111111	-0.428571	NA	NA	NA	NA	NA	NA	NA	NA	NA	NA	NA	NA	NA	NA	NA	NA	NA	NA	0.004394	0.008208	-0.012602	NA	NA	NA	NA	NA	NA	NA	NA	NA	NA	NA	NA	NA	NA	NA	NA	NA	NA
203684_s_at	BCL2	0.119048	0	0.0714286	0.119048	0	0.0714286	NA	NA	NA	NA	NA	NA	NA	NA	NA	NA	NA	NA	NA	NA	NA	NA	NA	NA	NA	NA	NA	NA	NA	NA	NA	NA	NA	NA	NA	NA	0.231187	-0.171023	-0.060165	NA	NA	NA	NA	NA	NA
203755_at	BUB1B	-0.261905	0.333333	0.0714286	-0.261905	0.333333	0.0714286	NA	NA	NA	NA	NA	NA	NA	NA	NA	NA	NA	NA	-0.592835	0.334595	0.25824	NA	NA	NA	NA	NA	NA	NA	NA	NA	NA	NA	NA	NA	NA	NA	NA	NA	NA	NA	NA	NA	NA	NA	NA
203808_at	AKT2	1	1	1	1	1	1	0	0	0	NA	NA	NA	NA	NA	NA	NA	NA	NA	NA	NA	NA	NA	NA	NA	NA	NA	NA	NA	NA	NA	NA	NA	NA	NA	NA	NA	NA	NA	NA	NA	NA	NA	NA	NA	NA
203809_s_at	AKT2	0.047619	0.111111	0.0714286	0.047619	0.111111	0.0714286	NA	NA	NA	NA	NA	NA	NA	NA	NA	NA	NA	NA	NA	NA	NA	NA	NA	NA	NA	NA	NA	NA	NA	NA	-0.068798	0.055583	0.013214	NA	NA	NA	NA	NA	NA	NA	NA	NA	NA	NA	NA
204782_at	MLF1	0	0.111111	0.0714286	0	0.111111	0.0714286	NA	NA	NA	NA	NA	NA	NA	NA	NA	NA	NA	NA	NA	NA	NA	-0.002131	0.003471	-0.00134	NA	NA	NA	NA	NA	NA	NA	NA	NA	NA	NA	NA	NA	NA	NA	NA	NA	NA	NA	NA	NA
204864_s_at	IL6ST	-0.214286	-0.222222	-0.357143	-0.214286	-0.222222	-0.357143	NA	NA	NA	NA	NA	NA	NA	NA	NA	NA	NA	NA	NA	NA	NA	NA	NA	NA	NA	NA	NA	NA	NA	NA	NA	NA	NA	0.015782	0.011284	-0.027066	NA	NA	NA	NA	NA	NA	NA	NA	NA
204907_s_at	BCL3	0	0	0.0714286	0	0	0.0714286	NA	NA	NA	NA	NA	NA	NA	NA	NA	0.00182	-0.008089	0.006269	NA	NA	NA	NA	NA	NA	NA	NA	NA	NA	NA	NA	NA	NA	NA	NA	NA	NA	NA	NA	NA	NA	NA	NA	NA	NA	NA
204918_s_at	MLLT3	-0.404762	0.666667	0.214286	-0.404762	0.666667	0.214286	NA	NA	NA	-0.263431	0.333417	-0.069985	NA	NA	NA	NA	NA	NA	NA	NA	NA	NA	NA	NA	NA	NA	NA	NA	NA	NA	NA	NA	NA	NA	NA	NA	NA	NA	NA	NA	NA	NA	NA	NA	NA
205267_at	POU2AF1	-0.452381	0	-0.285714	-0.452381	0	-0.285714	NA	NA	NA	NA	NA	NA	NA	NA	NA	NA	NA	NA	NA	NA	NA	NA	NA	NA	NA	NA	NA	NA	NA	NA	-0.162241	0.103788	0.058453	NA	NA	NA	NA	NA	NA	NA	NA	NA	NA	NA	NA
205867_at	PTPN11	0.0238095	0.111111	0.214286	0.0238095	0.111111	0.214286	NA	NA	NA	NA	NA	NA	NA	NA	NA	NA	NA	NA	-0.052734	0.010573	0.042161	NA	NA	NA	NA	NA	NA	NA	NA	NA	NA	NA	NA	NA	NA	NA	NA	NA	NA	NA	NA	NA	NA	NA	NA
205868_s_at	PTPN11	-0.119048	0.333333	0	-0.119048	0.333333	0	NA	NA	NA	NA	NA	NA	NA	NA	NA	NA	NA	NA	NA	NA	NA	NA	NA	NA	NA	NA	NA	NA	NA	NA	NA	NA	NA	-0.09261	0.115125	-0.022514	NA	NA	NA	NA	NA	NA	NA	NA	NA
205872_x_at	PDE4DIP	-0.0952381	0.333333	0.0714286	-0.0952381	0.333333	0.0714286	NA	NA	NA	-0.521576	0.271303	0.250273	NA	NA	NA	NA	NA	NA	NA	NA	NA	NA	NA	NA	NA	NA	NA	NA	NA	NA	NA	NA	NA	NA	NA	NA	NA	NA	NA	NA	NA	NA	NA	NA	NA
206501_x_at	ETV1	0.0238095	0.333333	0.142857	0.0238095	0.333333	0.142857	NA	NA	NA	NA	NA	NA	-0.047641	0.032785	0.014856	NA	NA	NA	NA	NA	NA	NA	NA	NA	NA	NA	NA	NA	NA	NA	NA	NA	NA	NA	NA	NA	NA	NA	NA	NA	NA	NA	NA	NA	NA
207046_at	HIST2H4A	0.0714286	0.222222	0.0714286	0.0714286	0.222222	0.0714286	NA	NA	NA	-0.000182	0.00093	-0.000748	NA	NA	NA	NA	NA	NA	NA	NA	NA	NA	NA	NA	NA	NA	NA	NA	NA	NA	NA	NA	NA	NA	NA	NA	NA	NA	NA	NA	NA	NA	NA	NA	NA
207163_s_at	AKT1	0.047619	0.333333	0.142857	0.047619	0.333333	0.142857	NA	NA	NA	NA	NA	NA	NA	NA	NA	NA	NA	NA	-0.286444	0.277773	0.008672	NA	NA	NA	NA	NA	NA	NA	NA	NA	NA	NA	NA	NA	NA	NA	NA	NA	NA	NA	NA	NA	NA	NA	NA
207332_s_at	TFRC	0.214286	-0.888889	0.142857	0.214286	-0.888889	0.142857	NA	NA	NA	0.412496	-0.336775	-0.075721	NA	NA	NA	NA	NA	NA	NA	NA	NA	NA	NA	NA	NA	NA	NA	NA	NA	NA	NA	NA	NA	NA	NA	NA	NA	NA	NA	NA	NA	NA	NA	NA	NA
207679_at	PAX3	0	0.222222	0	0	0.222222	0	NA	NA	NA	NA	NA	NA	NA	NA	NA	NA	NA	NA	NA	NA	NA	NA	NA	NA	0.003669	0.003967	-0.007636	NA	NA	NA	NA	NA	NA	NA	NA	NA	NA	NA	NA	NA	NA	NA	NA	NA	NA
207847_s_at	MUC1	-0.047619	-0.222222	0	-0.047619	-0.222222	0	NA	NA	NA	NA	NA	NA	NA	NA	NA	NA	NA	NA	NA	NA	NA	NA	NA	NA	NA	NA	NA	NA	NA	NA	NA	NA	NA	-0.18775	-0.440142	0.627891	NA	NA	NA	NA	NA	NA	NA	NA	NA
208691_at	TFRC	0.0952381	-0.333333	0.0714286	0.0952381	-0.333333	0.0714286	NA	NA	NA	0.377602	-0.264874	-0.112727	NA	NA	NA	NA	NA	NA	NA	NA	NA	NA	NA	NA	NA	NA	NA	NA	NA	NA	NA	NA	NA	NA	NA	NA	NA	NA	NA	NA	NA	NA	NA	NA	NA
208901_s_at	TOP1	-0.428571	0.444444	0.357143	-0.428571	0.444444	0.357143	NA	NA	NA	NA	NA	NA	NA	NA	NA	NA	NA	NA	NA	NA	NA	NA	NA	NA	-0.057526	0.037922	0.019604	NA	NA	NA	NA	NA	NA	NA	NA	NA	NA	NA	NA	NA	NA	NA	NA	NA	NA
209053_s_at	WHSC1	-0.142857	0.333333	0.142857	-0.142857	0.333333	0.142857	NA	NA	NA	NA	NA	NA	NA	NA	NA	NA	NA	NA	-0.80718	0.463968	0.343212	NA	NA	NA	NA	NA	NA	NA	NA	NA	NA	NA	NA	NA	NA	NA	NA	NA	NA	NA	NA	NA	NA	NA	NA
209152_s_at	TCF3	-0.142857	0.333333	0.142857	-0.142857	0.333333	0.142857	NA	NA	NA	NA	NA	NA	NA	NA	NA	NA	NA	NA	NA	NA	NA	NA	NA	NA	NA	NA	NA	NA	NA	NA	NA	NA	NA	NA	NA	NA	-0.174239	0.11686	0.057379	NA	NA	NA	NA	NA	NA
209214_s_at	EWSR1	0.0952381	0	-0.357143	0.0952381	0	-0.357143	NA	NA	NA	NA	NA	NA	NA	NA	NA	NA	NA	NA	NA	NA	NA	NA	NA	NA	NA	NA	NA	NA	NA	NA	NA	NA	NA	NA	NA	NA	0.136386	-0.038128	-0.098259	NA	NA	NA	NA	NA	NA
209375_at	XPC	-0.333333	0.777778	0.285714	-0.333333	0.777778	0.285714	NA	NA	NA	NA	NA	NA	NA	NA	NA	-0.019592	0.027475	-0.007883	NA	NA	NA	NA	NA	NA	NA	NA	NA	NA	NA	NA	NA	NA	NA	NA	NA	NA	NA	NA	NA	NA	NA	NA	NA	NA	NA
209619_at	CD74	0.285714	-0.333333	-0.142857	0.285714	-0.333333	-0.142857	NA	NA	NA	NA	NA	NA	NA	NA	NA	NA	NA	NA	NA	NA	NA	NA	NA	NA	0.197831	-0.275375	0.077544	NA	NA	NA	NA	NA	NA	NA	NA	NA	NA	NA	NA	NA	NA	NA	NA	NA	NA
209700_x_at	PDE4DIP	0	0.333333	0.0714286	0	0.333333	0.0714286	NA	NA	NA	-0.479823	0.275736	0.204088	NA	NA	NA	NA	NA	NA	NA	NA	NA	NA	NA	NA	NA	NA	NA	NA	NA	NA	NA	NA	NA	NA	NA	NA	NA	NA	NA	NA	NA	NA	NA	NA	NA
210046_s_at	IDH2	0.166667	-0.444444	-0.214286	0.166667	-0.444444	-0.214286	0.194798	-0.168996	-0.025802	NA	NA	NA	NA	NA	NA	NA	NA	NA	NA	NA	NA	NA	NA	NA	NA	NA	NA	NA	NA	NA	NA	NA	NA	NA	NA	NA	NA	NA	NA	NA	NA	NA	NA	NA	NA
210305_at	PDE4DIP	-0.619048	-0.555556	-0.142857	-0.619048	-0.555556	-0.142857	NA	NA	NA	-0.241347	-0.119254	0.360601	NA	NA	NA	NA	NA	NA	NA	NA	NA	NA	NA	NA	NA	NA	NA	NA	NA	NA	NA	NA	NA	NA	NA	NA	NA	NA	NA	NA	NA	NA	NA	NA	NA
210347_s_at	BCL11A	-0.0238095	0.111111	-0.0714286	-0.0238095	0.111111	-0.0714286	NA	NA	NA	NA	NA	NA	NA	NA	NA	NA	NA	NA	-0.07674	0.826535	-0.749795	NA	NA	NA	NA	NA	NA	NA	NA	NA	NA	NA	NA	NA	NA	NA	NA	NA	NA	NA	NA	NA	NA	NA	NA
210365_at	RUNX1	-0.547619	0	-0.5	-0.547619	0	-0.5	NA	NA	NA	NA	NA	NA	NA	NA	NA	NA	NA	NA	NA	NA	NA	NA	NA	NA	NA	NA	NA	NA	NA	NA	NA	NA	NA	NA	NA	NA	NA	NA	NA	NA	NA	NA	-0.041683	0.03161	0.010073
210889_s_at	FCGR2B	0.0714286	-0.333333	-0.285714	0.0714286	-0.333333	-0.285714	NA	NA	NA	NA	NA	NA	NA	NA	NA	NA	NA	NA	NA	NA	NA	NA	NA	NA	NA	NA	NA	NA	NA	NA	NA	NA	NA	0.475935	-0.350172	-0.125763	NA	NA	NA	NA	NA	NA	NA	NA	NA
210984_x_at	EGFR	-0.0952381	-0.111111	-0.857143	-0.0952381	-0.111111	-0.857143	NA	NA	NA	NA	NA	NA	NA	NA	NA	NA	NA	NA	NA	NA	NA	NA	NA	NA	NA	NA	NA	NA	NA	NA	NA	NA	NA	NA	NA	NA	0.568926	-0.095851	-0.473075	NA	NA	NA	NA	NA	NA
211017_s_at	NF2	0	0.222222	0.0714286	0	0.222222	0.0714286	NA	NA	NA	NA	NA	NA	NA	NA	NA	NA	NA	NA	-0.213917	0.172325	0.041591	NA	NA	NA	NA	NA	NA	NA	NA	NA	NA	NA	NA	NA	NA	NA	NA	NA	NA	NA	NA	NA	NA	NA	NA
211450_s_at	MSH6	0.119048	-0.888889	-0.428571	0.119048	-0.888889	-0.428571	NA	NA	NA	NA	NA	NA	NA	NA	NA	NA	NA	NA	NA	NA	NA	NA	NA	NA	NA	NA	NA	NA	NA	NA	NA	NA	NA	NA	NA	NA	0.75555	-0.668008	-0.087542	NA	NA	NA	NA	NA	NA
211533_at	PDGFRA	0.0238095	0.555556	0.0714286	0.0238095	0.555556	0.0714286	NA	NA	NA	NA	NA	NA	-0.003111	0.002435	0.000676	NA	NA	NA	NA	NA	NA	NA	NA	NA	NA	NA	NA	NA	NA	NA	NA	NA	NA	NA	NA	NA	NA	NA	NA	NA	NA	NA	NA	NA	NA
211535_s_at	FGFR1	-0.142857	0.222222	0	-0.142857	0.222222	0	NA	NA	NA	NA	NA	NA	NA	NA	NA	NA	NA	NA	NA	NA	NA	NA	NA	NA	-0.091389	0.094512	-0.003123	NA	NA	NA	NA	NA	NA	NA	NA	NA	NA	NA	NA	NA	NA	NA	NA	NA	NA
211607_x_at	EGFR	-0.0952381	-0.666667	-0.928571	-0.0952381	-0.666667	-0.928571	NA	NA	NA	NA	NA	NA	NA	NA	NA	NA	NA	NA	NA	NA	NA	NA	NA	NA	NA	NA	NA	NA	NA	NA	NA	NA	NA	NA	NA	NA	0.56076	-0.138549	-0.422212	NA	NA	NA	NA	NA	NA
211858_x_at	GNAS	-0.0714286	0.333333	0.214286	-0.0714286	0.333333	0.214286	NA	NA	NA	-0.099931	0.051861	0.04807	NA	NA	NA	NA	NA	NA	NA	NA	NA	NA	NA	NA	NA	NA	NA	NA	NA	NA	NA	NA	NA	NA	NA	NA	NA	NA	NA	NA	NA	NA	NA	NA	NA
212238_at	ASXL1	-0.0238095	0.222222	-0.0714286	-0.0238095	0.222222	-0.0714286	NA	NA	NA	0.001451	0.010984	-0.012435	NA	NA	NA	NA	NA	NA	NA	NA	NA	NA	NA	NA	NA	NA	NA	NA	NA	NA	NA	NA	NA	NA	NA	NA	NA	NA	NA	NA	NA	NA	NA	NA	NA
212345_s_at	CREB3L2	0.142857	-0.666667	0.357143	0.142857	-0.666667	0.357143	NA	NA	NA	NA	NA	NA	NA	NA	NA	NA	NA	NA	NA	NA	NA	NA	NA	NA	-0.000985	-0.256054	0.257039	NA	NA	NA	NA	NA	NA	NA	NA	NA	NA	NA	NA	NA	NA	NA	NA	NA	NA
212369_at	ZNF384	0.190476	0.555556	-0.357143	0.190476	0.555556	-0.357143	NA	NA	NA	NA	NA	NA	NA	NA	NA	NA	NA	NA	NA	NA	NA	NA	NA	NA	NA	NA	NA	NA	NA	NA	NA	NA	NA	NA	NA	NA	0.097689	0.105801	-0.20349	NA	NA	NA	NA	NA	NA
212414_s_at	2006-09-01	-0.119048	0.444444	-0.0714286	-0.119048	0.444444	-0.0714286	NA	NA	NA	NA	NA	NA	NA	NA	NA	NA	NA	NA	NA	NA	NA	NA	NA	NA	NA	NA	NA	NA	NA	NA	NA	NA	NA	NA	NA	NA	NA	NA	NA	-0.175588	0.218588	-0.043	NA	NA	NA
212888_at	DICER1	-0.0714286	0	0.142857	-0.0714286	0	0.142857	NA	NA	NA	NA	NA	NA	NA	NA	NA	NA	NA	NA	NA	NA	NA	NA	NA	NA	NA	NA	NA	NA	NA	NA	NA	NA	NA	NA	NA	NA	NA	NA	NA	-0.131187	-0.018473	0.14966	NA	NA	NA
213032_at	NFIB	0.142857	0.333333	-0.142857	0.142857	0.333333	-0.142857	NA	NA	NA	NA	NA	NA	NA	NA	NA	NA	NA	NA	NA	NA	NA	NA	NA	NA	NA	NA	NA	NA	NA	NA	NA	NA	NA	NA	NA	NA	NA	NA	NA	0.240376	0.343276	-0.583652	NA	NA	NA
213809_x_at	TCF3	0.0238095	0	0	0.0238095	0	0	NA	NA	NA	NA	NA	NA	NA	NA	NA	NA	NA	NA	NA	NA	NA	NA	NA	NA	NA	NA	NA	NA	NA	NA	NA	NA	NA	0.003877	0.002076	-0.005954	NA	NA	NA	NA	NA	NA	NA	NA	NA
214160_at	CDK6	0.0714286	0	0.0714286	0.0714286	0	0.0714286	NA	NA	NA	NA	NA	NA	NA	NA	NA	NA	NA	NA	NA	NA	NA	NA	NA	NA	NA	NA	NA	NA	NA	NA	NA	NA	NA	NA	NA	NA	NA	NA	NA	-6.7e-05	-6.7e-05	0.000134	NA	NA	NA
214831_at	ELK4	0.0238095	0.444444	0	0.0238095	0.444444	0	-0.046967	0.103372	-0.056405	NA	NA	NA	NA	NA	NA	NA	NA	NA	NA	NA	NA	NA	NA	NA	NA	NA	NA	NA	NA	NA	NA	NA	NA	NA	NA	NA	NA	NA	NA	NA	NA	NA	NA	NA	NA
214937_x_at	PCM1	0.119048	0.222222	-0.357143	0.119048	0.222222	-0.357143	NA	NA	NA	NA	NA	NA	NA	NA	NA	NA	NA	NA	NA	NA	NA	0.043498	0.072218	-0.115715	NA	NA	NA	NA	NA	NA	NA	NA	NA	NA	NA	NA	NA	NA	NA	NA	NA	NA	NA	NA	NA
215305_at	PDGFRA	0.047619	0.222222	0.214286	0.047619	0.222222	0.214286	NA	NA	NA	NA	NA	NA	-0.01866	0.034835	-0.016175	NA	NA	NA	NA	NA	NA	NA	NA	NA	NA	NA	NA	NA	NA	NA	NA	NA	NA	NA	NA	NA	NA	NA	NA	NA	NA	NA	NA	NA	NA
215990_s_at	BCL6	0.0952381	-0.666667	-0.5	0.0952381	-0.666667	-0.5	NA	NA	NA	NA	NA	NA	NA	NA	NA	NA	NA	NA	NA	NA	NA	NA	NA	NA	NA	NA	NA	0.244046	-0.354907	0.110862	NA	NA	NA	NA	NA	NA	NA	NA	NA	NA	NA	NA	NA	NA	NA
216509_x_at	MLLT10	0.0714286	0.444444	0.0714286	0.0714286	0.444444	0.0714286	NA	NA	NA	-0.000577	0.006907	-0.00633	NA	NA	NA	NA	NA	NA	NA	NA	NA	NA	NA	NA	NA	NA	NA	NA	NA	NA	NA	NA	NA	NA	NA	NA	NA	NA	NA	NA	NA	NA	NA	NA	NA
216836_s_at	ERBB2	-0.119048	0.555556	0.142857	-0.119048	0.555556	0.142857	NA	NA	NA	NA	NA	NA	NA	NA	NA	NA	NA	NA	NA	NA	NA	NA	NA	NA	-0.016523	0.010208	0.006315	NA	NA	NA	NA	NA	NA	NA	NA	NA	NA	NA	NA	NA	NA	NA	NA	NA	NA
216979_at	NR4A3	-0.404762	-0.555556	-0.714286	-0.404762	-0.555556	-0.714286	NA	NA	NA	NA	NA	NA	NA	NA	NA	NA	NA	NA	NA	NA	NA	NA	NA	NA	NA	NA	NA	NA	NA	NA	0.021522	0.004361	-0.025883	NA	NA	NA	NA	NA	NA	NA	NA	NA	NA	NA	NA
217057_s_at	GNAS	0.0238095	0.222222	0.0714286	0.0238095	0.222222	0.0714286	NA	NA	NA	NA	NA	NA	NA	NA	NA	NA	NA	NA	NA	NA	NA	NA	NA	NA	NA	NA	NA	NA	NA	NA	NA	NA	NA	NA	NA	NA	NA	NA	NA	NA	NA	NA	-0.045282	0.046461	-0.001179
217847_s_at	THRAP3	0	0.111111	0	0	0.111111	0	NA	NA	NA	-0.025995	0.057072	-0.031077	NA	NA	NA	NA	NA	NA	NA	NA	NA	NA	NA	NA	NA	NA	NA	NA	NA	NA	NA	NA	NA	NA	NA	NA	NA	NA	NA	NA	NA	NA	NA	NA	NA
218173_s_at	WHSC1L1	0.0714286	0.222222	0.0714286	0.0714286	0.222222	0.0714286	NA	NA	NA	-0.001482	0.044315	-0.042833	NA	NA	NA	NA	NA	NA	NA	NA	NA	NA	NA	NA	NA	NA	NA	NA	NA	NA	NA	NA	NA	NA	NA	NA	NA	NA	NA	NA	NA	NA	NA	NA	NA
219497_s_at	BCL11A	-0.238095	0.333333	-0.0714286	-0.238095	0.333333	-0.0714286	NA	NA	NA	NA	NA	NA	NA	NA	NA	NA	NA	NA	NA	NA	NA	NA	NA	NA	NA	NA	NA	NA	NA	NA	NA	NA	NA	NA	NA	NA	NA	NA	NA	NA	NA	NA	-0.200539	0.156137	0.044401
220255_at	FANCE	0.0714286	0.111111	-0.0714286	0.0714286	0.111111	-0.0714286	NA	NA	NA	NA	NA	NA	NA	NA	NA	NA	NA	NA	NA	NA	NA	NA	NA	NA	NA	NA	NA	NA	NA	NA	NA	NA	NA	NA	NA	NA	0.010308	0.087325	-0.097634	NA	NA	NA	NA	NA	NA
220638_s_at	CBLC	0	0.111111	0	0	0.111111	0	NA	NA	NA	-0.00021	0.000944	-0.000734	NA	NA	NA	NA	NA	NA	NA	NA	NA	NA	NA	NA	NA	NA	NA	NA	NA	NA	NA	NA	NA	NA	NA	NA	NA	NA	NA	NA	NA	NA	NA	NA	NA
221911_at	ETV1	-0.238095	-0.333333	0.357143	-0.238095	-0.333333	0.357143	NA	NA	NA	NA	NA	NA	NA	NA	NA	NA	NA	NA	0.397673	-1.08456	0.686886	NA	NA	NA	NA	NA	NA	NA	NA	NA	NA	NA	NA	NA	NA	NA	NA	NA	NA	NA	NA	NA	NA	NA	NA
221923_s_at	NPM1	0.380952	-0.666667	-0.357143	0.380952	-0.666667	-0.357143	0.16999	-0.279685	0.109695	NA	NA	NA	NA	NA	NA	NA	NA	NA	NA	NA	NA	NA	NA	NA	NA	NA	NA	NA	NA	NA	NA	NA	NA	NA	NA	NA	NA	NA	NA	NA	NA	NA	NA	NA	NA
39318_at	TCL1A	0.0238095	0.111111	0.0714286	0.0238095	0.111111	0.0714286	NA	NA	NA	NA	NA	NA	NA	NA	NA	NA	NA	NA	NA	NA	NA	NA	NA	NA	NA	NA	NA	NA	NA	NA	NA	NA	NA	NA	NA	NA	-0.038429	0.021967	0.016462	NA	NA	NA	NA	NA	NA
200951_s_at	CCND2	-0.238095	0.333333	0.285714	-0.238095	0.333333	0.285714	NA	NA	NA	NA	NA	NA	NA	NA	NA	NA	NA	NA	NA	NA	NA	NA	NA	NA	NA	NA	NA	NA	NA	NA	NA	NA	NA	NA	NA	NA	NA	NA	NA	NA	NA	NA	NA	NA	NA
202176_at	ERCC3	0.214286	0.222222	-0.642857	0.214286	0.222222	-0.642857	NA	NA	NA	NA	NA	NA	NA	NA	NA	NA	NA	NA	NA	NA	NA	NA	NA	NA	NA	NA	NA	NA	NA	NA	NA	NA	NA	NA	NA	NA	NA	NA	NA	NA	NA	NA	NA	NA	NA
202191_s_at	GAS7	-0.357143	0.666667	0.0714286	-0.357143	0.666667	0.0714286	NA	NA	NA	NA	NA	NA	NA	NA	NA	NA	NA	NA	NA	NA	NA	NA	NA	NA	NA	NA	NA	NA	NA	NA	NA	NA	NA	NA	NA	NA	NA	NA	NA	NA	NA	NA	NA	NA	NA
202192_s_at	GAS7	-0.142857	0.333333	0.0714286	-0.142857	0.333333	0.0714286	NA	NA	NA	NA	NA	NA	NA	NA	NA	NA	NA	NA	NA	NA	NA	NA	NA	NA	NA	NA	NA	NA	NA	NA	NA	NA	NA	NA	NA	NA	NA	NA	NA	NA	NA	NA	NA	NA	NA
202615_at	GNAQ	0.119048	-0.333333	0.142857	0.119048	-0.333333	0.142857	NA	NA	NA	NA	NA	NA	NA	NA	NA	NA	NA	NA	NA	NA	NA	NA	NA	NA	NA	NA	NA	NA	NA	NA	NA	NA	NA	NA	NA	NA	NA	NA	NA	NA	NA	NA	NA	NA	NA
202822_at	LPP	0.047619	-0.333333	0.142857	0.047619	-0.333333	0.142857	NA	NA	NA	NA	NA	NA	NA	NA	NA	NA	NA	NA	NA	NA	NA	NA	NA	NA	NA	NA	NA	NA	NA	NA	NA	NA	NA	NA	NA	NA	NA	NA	NA	NA	NA	NA	NA	NA	NA
202911_at	MSH6	0.309524	-0.777778	0.142857	0.309524	-0.777778	0.142857	NA	NA	NA	NA	NA	NA	NA	NA	NA	NA	NA	NA	NA	NA	NA	NA	NA	NA	NA	NA	NA	NA	NA	NA	NA	NA	NA	NA	NA	NA	NA	NA	NA	NA	NA	NA	NA	NA	NA
203564_at	FANCG	0.047619	0.222222	-0.285714	0.047619	0.222222	-0.285714	NA	NA	NA	NA	NA	NA	NA	NA	NA	NA	NA	NA	NA	NA	NA	NA	NA	NA	NA	NA	NA	NA	NA	NA	NA	NA	NA	NA	NA	NA	NA	NA	NA	NA	NA	NA	NA	NA	NA
204379_s_at	FGFR3	0.214286	0.444444	-0.214286	0.214286	0.444444	-0.214286	NA	NA	NA	NA	NA	NA	NA	NA	NA	NA	NA	NA	NA	NA	NA	NA	NA	NA	NA	NA	NA	NA	NA	NA	NA	NA	NA	NA	NA	NA	NA	NA	NA	NA	NA	NA	NA	NA	NA
204890_s_at	LCK	-0.214286	-0.777778	-0.642857	-0.214286	-0.777778	-0.642857	NA	NA	NA	NA	NA	NA	NA	NA	NA	NA	NA	NA	NA	NA	NA	NA	NA	NA	NA	NA	NA	NA	NA	NA	NA	NA	NA	NA	NA	NA	NA	NA	NA	NA	NA	NA	NA	NA	NA
205106_at	MTCP1	-0.047619	-0.666667	-0.642857	-0.047619	-0.666667	-0.642857	NA	NA	NA	NA	NA	NA	NA	NA	NA	NA	NA	NA	NA	NA	NA	NA	NA	NA	NA	NA	NA	NA	NA	NA	NA	NA	NA	NA	NA	NA	NA	NA	NA	NA	NA	NA	NA	NA	NA
205967_at	HIST1H4C	-0.0238095	0	-0.142857	-0.0238095	0	-0.142857	NA	NA	NA	NA	NA	NA	NA	NA	NA	NA	NA	NA	NA	NA	NA	NA	NA	NA	NA	NA	NA	NA	NA	NA	NA	NA	NA	NA	NA	NA	NA	NA	NA	NA	NA	NA	NA	NA	NA
206405_x_at	USP6	-0.595238	0	0.142857	-0.595238	0	0.142857	NA	NA	NA	NA	NA	NA	NA	NA	NA	NA	NA	NA	NA	NA	NA	NA	NA	NA	NA	NA	NA	NA	NA	NA	NA	NA	NA	NA	NA	NA	NA	NA	NA	NA	NA	NA	NA	NA	NA
206788_s_at	CBFB	-0.166667	0.111111	-0.0714286	-0.166667	0.111111	-0.0714286	NA	NA	NA	NA	NA	NA	NA	NA	NA	NA	NA	NA	NA	NA	NA	NA	NA	NA	NA	NA	NA	NA	NA	NA	NA	NA	NA	NA	NA	NA	NA	NA	NA	NA	NA	NA	NA	NA	NA
207179_at	TLX1	0.0714286	0	0	0.0714286	0	0	NA	NA	NA	NA	NA	NA	NA	NA	NA	NA	NA	NA	NA	NA	NA	NA	NA	NA	NA	NA	NA	NA	NA	NA	NA	NA	NA	NA	NA	NA	NA	NA	NA	NA	NA	NA	NA	NA	NA
207397_s_at	HOXD13	0.0238095	0.111111	0	0.0238095	0.111111	0	NA	NA	NA	NA	NA	NA	NA	NA	NA	NA	NA	NA	NA	NA	NA	NA	NA	NA	NA	NA	NA	NA	NA	NA	NA	NA	NA	NA	NA	NA	NA	NA	NA	NA	NA	NA	NA	NA	NA
207704_s_at	GAS7	0	0	0.142857	0	0	0.142857	NA	NA	NA	NA	NA	NA	NA	NA	NA	NA	NA	NA	NA	NA	NA	NA	NA	NA	NA	NA	NA	NA	NA	NA	NA	NA	NA	NA	NA	NA	NA	NA	NA	NA	NA	NA	NA	NA	NA
208046_at	HIST1H4A	0.0952381	0	0	0.0952381	0	0	NA	NA	NA	NA	NA	NA	NA	NA	NA	NA	NA	NA	NA	NA	NA	NA	NA	NA	NA	NA	NA	NA	NA	NA	NA	NA	NA	NA	NA	NA	NA	NA	NA	NA	NA	NA	NA	NA	NA
208234_x_at	FGFR2	0.119048	0.111111	0.0714286	0.119048	0.111111	0.0714286	NA	NA	NA	NA	NA	NA	NA	NA	NA	NA	NA	NA	NA	NA	NA	NA	NA	NA	NA	NA	NA	NA	NA	NA	NA	NA	NA	NA	NA	NA	NA	NA	NA	NA	NA	NA	NA	NA	NA
209054_s_at	WHSC1	-0.285714	0.777778	0	-0.285714	0.777778	0	NA	NA	NA	NA	NA	NA	NA	NA	NA	NA	NA	NA	NA	NA	NA	NA	NA	NA	NA	NA	NA	NA	NA	NA	NA	NA	NA	NA	NA	NA	NA	NA	NA	NA	NA	NA	NA	NA	NA
209151_x_at	TCF3	0.0238095	0.444444	0	0.0238095	0.444444	0	NA	NA	NA	NA	NA	NA	NA	NA	NA	NA	NA	NA	NA	NA	NA	NA	NA	NA	NA	NA	NA	NA	NA	NA	NA	NA	NA	NA	NA	NA	NA	NA	NA	NA	NA	NA	NA	NA	NA
209682_at	CBLB	-0.309524	0.555556	-0.142857	-0.309524	0.555556	-0.142857	NA	NA	NA	NA	NA	NA	NA	NA	NA	NA	NA	NA	NA	NA	NA	NA	NA	NA	NA	NA	NA	NA	NA	NA	NA	NA	NA	NA	NA	NA	NA	NA	NA	NA	NA	NA	NA	NA	NA
209805_at	PMS2	-0.547619	0.666667	0.428571	-0.547619	0.666667	0.428571	NA	NA	NA	NA	NA	NA	NA	NA	NA	NA	NA	NA	NA	NA	NA	NA	NA	NA	NA	NA	NA	NA	NA	NA	NA	NA	NA	NA	NA	NA	NA	NA	NA	NA	NA	NA	NA	NA	NA
209854_s_at	KLK2	0	0	0.0714286	0	0	0.0714286	NA	NA	NA	NA	NA	NA	NA	NA	NA	NA	NA	NA	NA	NA	NA	NA	NA	NA	NA	NA	NA	NA	NA	NA	NA	NA	NA	NA	NA	NA	NA	NA	NA	NA	NA	NA	NA	NA	NA
209896_s_at	PTPN11	-0.285714	0.555556	0.285714	-0.285714	0.555556	0.285714	NA	NA	NA	NA	NA	NA	NA	NA	NA	NA	NA	NA	NA	NA	NA	NA	NA	NA	NA	NA	NA	NA	NA	NA	NA	NA	NA	NA	NA	NA	NA	NA	NA	NA	NA	NA	NA	NA	NA
210011_s_at	EWSR1	-0.0238095	0.444444	-0.142857	-0.0238095	0.444444	-0.142857	NA	NA	NA	NA	NA	NA	NA	NA	NA	NA	NA	NA	NA	NA	NA	NA	NA	NA	NA	NA	NA	NA	NA	NA	NA	NA	NA	NA	NA	NA	NA	NA	NA	NA	NA	NA	NA	NA	NA
210017_at	MALT1	0.0238095	0.333333	0	0.0238095	0.333333	0	NA	NA	NA	NA	NA	NA	NA	NA	NA	NA	NA	NA	NA	NA	NA	NA	NA	NA	NA	NA	NA	NA	NA	NA	NA	NA	NA	NA	NA	NA	NA	NA	NA	NA	NA	NA	NA	NA	NA
210457_x_at	HMGA1	0.0952381	0.333333	-0.142857	0.0952381	0.333333	-0.142857	NA	NA	NA	NA	NA	NA	NA	NA	NA	NA	NA	NA	NA	NA	NA	NA	NA	NA	NA	NA	NA	NA	NA	NA	NA	NA	NA	NA	NA	NA	NA	NA	NA	NA	NA	NA	NA	NA	NA
210872_x_at	GAS7	0.047619	0.111111	0.0714286	0.047619	0.111111	0.0714286	NA	NA	NA	NA	NA	NA	NA	NA	NA	NA	NA	NA	NA	NA	NA	NA	NA	NA	NA	NA	NA	NA	NA	NA	NA	NA	NA	NA	NA	NA	NA	NA	NA	NA	NA	NA	NA	NA	NA
211067_s_at	GAS7	0.0952381	0.111111	0.214286	0.0952381	0.111111	0.214286	NA	NA	NA	NA	NA	NA	NA	NA	NA	NA	NA	NA	NA	NA	NA	NA	NA	NA	NA	NA	NA	NA	NA	NA	NA	NA	NA	NA	NA	NA	NA	NA	NA	NA	NA	NA	NA	NA	NA
211695_x_at	MUC1	-0.380952	-0.444444	0	-0.380952	-0.444444	0	NA	NA	NA	NA	NA	NA	NA	NA	NA	NA	NA	NA	NA	NA	NA	NA	NA	NA	NA	NA	NA	NA	NA	NA	NA	NA	NA	NA	NA	NA	NA	NA	NA	NA	NA	NA	NA	NA	NA
211903_s_at	MPL	0	0	0.142857	0	0	0.142857	NA	NA	NA	NA	NA	NA	NA	NA	NA	NA	NA	NA	NA	NA	NA	NA	NA	NA	NA	NA	NA	NA	NA	NA	NA	NA	NA	NA	NA	NA	NA	NA	NA	NA	NA	NA	NA	NA	NA
212237_at	ASXL1	-0.047619	0.555556	-0.285714	-0.047619	0.555556	-0.285714	NA	NA	NA	NA	NA	NA	NA	NA	NA	NA	NA	NA	NA	NA	NA	NA	NA	NA	NA	NA	NA	NA	NA	NA	NA	NA	NA	NA	NA	NA	NA	NA	NA	NA	NA	NA	NA	NA	NA
212239_at	PIK3R1	-0.0714286	0.555556	0.285714	-0.0714286	0.555556	0.285714	NA	NA	NA	NA	NA	NA	NA	NA	NA	NA	NA	NA	NA	NA	NA	NA	NA	NA	NA	NA	NA	NA	NA	NA	NA	NA	NA	NA	NA	NA	NA	NA	NA	NA	NA	NA	NA	NA	NA
212240_s_at	PIK3R1	-0.119048	0.555556	0.0714286	-0.119048	0.555556	0.0714286	NA	NA	NA	NA	NA	NA	NA	NA	NA	NA	NA	NA	NA	NA	NA	NA	NA	NA	NA	NA	NA	NA	NA	NA	NA	NA	NA	NA	NA	NA	NA	NA	NA	NA	NA	NA	NA	NA	NA
212249_at	PIK3R1	-0.357143	0.666667	0.214286	-0.357143	0.666667	0.214286	NA	NA	NA	NA	NA	NA	NA	NA	NA	NA	NA	NA	NA	NA	NA	NA	NA	NA	NA	NA	NA	NA	NA	NA	NA	NA	NA	NA	NA	NA	NA	NA	NA	NA	NA	NA	NA	NA	NA
212390_at	PDE4DIP	-0.238095	0.222222	0.0714286	-0.238095	0.222222	0.0714286	NA	NA	NA	NA	NA	NA	NA	NA	NA	NA	NA	NA	NA	NA	NA	NA	NA	NA	NA	NA	NA	NA	NA	NA	NA	NA	NA	NA	NA	NA	NA	NA	NA	NA	NA	NA	NA	NA	NA
212983_at	HRAS	-0.0238095	0.555556	-0.428571	-0.0238095	0.555556	-0.428571	NA	NA	NA	NA	NA	NA	NA	NA	NA	NA	NA	NA	NA	NA	NA	NA	NA	NA	NA	NA	NA	NA	NA	NA	NA	NA	NA	NA	NA	NA	NA	NA	NA	NA	NA	NA	NA	NA	NA
213140_s_at	SS18L1	-0.119048	0.666667	0.214286	-0.119048	0.666667	0.214286	NA	NA	NA	NA	NA	NA	NA	NA	NA	NA	NA	NA	NA	NA	NA	NA	NA	NA	NA	NA	NA	NA	NA	NA	NA	NA	NA	NA	NA	NA	NA	NA	NA	NA	NA	NA	NA	NA	NA
213468_at	ERCC2	-0.380952	-0.555556	-0.428571	-0.380952	-0.555556	-0.428571	NA	NA	NA	NA	NA	NA	NA	NA	NA	NA	NA	NA	NA	NA	NA	NA	NA	NA	NA	NA	NA	NA	NA	NA	NA	NA	NA	NA	NA	NA	NA	NA	NA	NA	NA	NA	NA	NA	NA
213677_s_at	PMS1	0.0238095	0.555556	-0.142857	0.0238095	0.555556	-0.142857	NA	NA	NA	NA	NA	NA	NA	NA	NA	NA	NA	NA	NA	NA	NA	NA	NA	NA	NA	NA	NA	NA	NA	NA	NA	NA	NA	NA	NA	NA	NA	NA	NA	NA	NA	NA	NA	NA	NA
214251_s_at	NUMA1	0.0714286	-0.111111	-0.214286	0.0714286	-0.111111	-0.214286	NA	NA	NA	NA	NA	NA	NA	NA	NA	NA	NA	NA	NA	NA	NA	NA	NA	NA	NA	NA	NA	NA	NA	NA	NA	NA	NA	NA	NA	NA	NA	NA	NA	NA	NA	NA	NA	NA	NA
215152_at	MYB	0.0238095	0	0	0.0238095	0	0	NA	NA	NA	NA	NA	NA	NA	NA	NA	NA	NA	NA	NA	NA	NA	NA	NA	NA	NA	NA	NA	NA	NA	NA	NA	NA	NA	NA	NA	NA	NA	NA	NA	NA	NA	NA	NA	NA	NA
215220_s_at	TPR	-0.214286	0.555556	-0.142857	-0.214286	0.555556	-0.142857	NA	NA	NA	NA	NA	NA	NA	NA	NA	NA	NA	NA	NA	NA	NA	NA	NA	NA	NA	NA	NA	NA	NA	NA	NA	NA	NA	NA	NA	NA	NA	NA	NA	NA	NA	NA	NA	NA	NA
215780_s_at	SET	-0.452381	0.888889	0.214286	-0.452381	0.888889	0.214286	NA	NA	NA	NA	NA	NA	NA	NA	NA	NA	NA	NA	NA	NA	NA	NA	NA	NA	NA	NA	NA	NA	NA	NA	NA	NA	NA	NA	NA	NA	NA	NA	NA	NA	NA	NA	NA	NA	NA
219286_s_at	RBM15	-0.190476	0.777778	-0.357143	-0.190476	0.777778	-0.357143	NA	NA	NA	NA	NA	NA	NA	NA	NA	NA	NA	NA	NA	NA	NA	NA	NA	NA	NA	NA	NA	NA	NA	NA	NA	NA	NA	NA	NA	NA	NA	NA	NA	NA	NA	NA	NA	NA	NA
221007_s_at	FIP1L1	-0.309524	1	-0.214286	-0.309524	1	-0.214286	NA	NA	NA	NA	NA	NA	NA	NA	NA	NA	NA	NA	NA	NA	NA	NA	NA	NA	NA	NA	NA	NA	NA	NA	NA	NA	NA	NA	NA	NA	NA	NA	NA	NA	NA	NA	NA	NA	NA
31845_at	ELF4	-0.0714286	0.444444	-0.142857	-0.0714286	0.444444	-0.142857	NA	NA	NA	NA	NA	NA	NA	NA	NA	NA	NA	NA	NA	NA	NA	NA	NA	NA	NA	NA	NA	NA	NA	NA	NA	NA	NA	NA	NA	NA	NA	NA	NA	NA	NA	NA	NA	NA	NA
